# Supplementary material for: The “Wanderlust” of Me3Si groups in rare-earth triple-decker complexes: a combined experimental and computational study
Source: Royal Society of Chemistry journal article supplement (doi:10.1039/c8cc05317k), 2018-01-01
Supplement: c8cc05317k1.pdf [file c8cc05317k1.pdf]

# The "Wanderlust" of Me<sub>3</sub>Si groups in rare-earth triple-decker complexes: A combined experimental and computational study

Volker Lorenz,<sup>a</sup> Phil Liebing,<sup>b</sup> Adrien Bathelier,<sup>c</sup> Felix Engelhardt,<sup>a</sup> Laurent Maron,<sup>\*c</sup>  
Liane Hilfert,<sup>a</sup> Sabine Busse<sup>a</sup> and Frank T. Edelmann<sup>\*a</sup>

## Supplementary Information

- 
- a. Chemisches Institut der Otto-von-Guericke-Universität, 39106 Magdeburg, Germany.*
- b. ETH Zürich, Laboratorium für Anorganische Chemie, Vladimir-Prelog-Weg 2, 8093 Zürich, Switzerland.*
- c. Université de Toulouse, INSA, UPS, CNRS-UMR5215, LPCNO Avenue de Rangueil 135, 31077 Toulouse, France*

## Table of Contents

|                                                                                                      | Page |
|------------------------------------------------------------------------------------------------------|------|
| 1. Preparation and full characterization for all new compounds                                       | 3    |
| 2. $^{13}\text{C}$ NMR spectra of <b>4Y</b> , <b>4La</b> and <b>4Lu</b>                              | 7    |
| 3. Supporting NMR experiments                                                                        | 11   |
| 4. X-Ray crystallographic data for <b>4Y</b> , <b>4La</b> , <b>4Tb</b> , <b>4Tm</b> , and <b>4Lu</b> | 13   |
| 5. Details on the Analysis of Close Interactions in <b>4Y-1,5</b> and <b>4Y-1,4</b>                  | 27   |
| 6. Computational details                                                                             | 30   |
| 7. References                                                                                        | 111  |

## 1. Preparation and full characterization for all new compounds

**General procedures:** All operations were performed with rigorous exclusion of air and moisture under an inert atmosphere of dry argon, employing standard Schlenk and glovebox techniques (MBraun MBLab; <1 ppm O<sub>2</sub>, <1 ppm H<sub>2</sub>O). THF, DME, TMEDA, and toluene were dried over sodium/benzophenone and freshly distilled under nitrogen atmosphere prior to use. All glassware was oven-dried at 120 °C for at least 24 h, assembled while hot and cooled under high vacuum prior to use. The starting materials, anhydrous [Li(THF)<sub>4</sub>][Ln{C<sub>8</sub>H<sub>6</sub>(SiMe<sub>3</sub>)<sub>2</sub>}<sub>2</sub>] (Ln = Y, La, Tb, Tm, Lu),<sup>[S1]</sup> 1,4-C<sub>8</sub>H<sub>6</sub>(SiMe<sub>3</sub>)<sub>2</sub><sup>[S2]</sup> and anhydrous CoCl<sub>2</sub><sup>[S3]</sup> were prepared according to published procedures. 1.6 M *n*-Butyllithium solution in hexanes was obtained from commercial sources and used as received. The NMR spectra were recorded in *d*<sub>8</sub>-THF solutions on a Bruker DPX 600 (<sup>1</sup>H: 600.1 MHz; <sup>13</sup>C: 150.9 MHz) or a Bruker-AVANCE-DMX400 (<sup>1</sup>H: 400.1 MHz; <sup>13</sup>C: 100.6 MHz). <sup>1</sup>H and <sup>13</sup>C shifts are referenced to internal solvent resonances and reported in parts per million (ppm) relative to TMS. IR spectra were measured using an ATR IR spectrometer Bruker Vertex V70. Mass spectra (EI, 70 eV) were recorded on a MAT 95 apparatus. Microanalyses of the compounds were performed using a Leco CHNS 932 apparatus.

### **Synthesis of Y<sub>2</sub>{μ-η<sup>8</sup>:η<sup>8</sup>-C<sub>8</sub>H<sub>6</sub>-1,4-(SiMe<sub>3</sub>)<sub>2</sub>}<sub>2</sub>{η<sup>8</sup>-C<sub>8</sub>H<sub>6</sub>-1,4-(SiMe<sub>3</sub>)<sub>2</sub>}<sub>2</sub> (4Y-1,4) and Y<sub>2</sub>{μ-η<sup>8</sup>:η<sup>8</sup>-C<sub>8</sub>H<sub>6</sub>-1,5-(SiMe<sub>3</sub>)<sub>2</sub>}<sub>2</sub>{η<sup>8</sup>-C<sub>8</sub>H<sub>6</sub>-1,4-(SiMe<sub>3</sub>)<sub>2</sub>}<sub>2</sub> (4Y-1,5)**

0.28 g (2.2 mmol) of anhydrous CoCl<sub>2</sub> were added to a stirred solution of 3.8 g (4.33 mmol) [Li(THF)<sub>4</sub>][Y{C<sub>8</sub>H<sub>6</sub>(SiMe<sub>3</sub>)<sub>2</sub>}<sub>2</sub>] in toluene (100 mL) at r.t. The reaction mixture was stirred for 24 h and refluxed for an additional 0.5 h. After filtration, the solvent was evaporated *in vacuo*. The solid residue was extracted with 150 mL of *n*-pentane. Upon removal of 100 mL of the *n*-pentane, Y<sub>2</sub>(COT'')<sub>3</sub> precipitated at r.t. as yellow crystals (1.2 g, 60%). The first fraction of crystals was identified as Y<sub>2</sub>{μ-η<sup>8</sup>:η<sup>8</sup>-C<sub>8</sub>H<sub>6</sub>-1,5-(SiMe<sub>3</sub>)<sub>2</sub>}<sub>2</sub>{η<sup>8</sup>-C<sub>8</sub>H<sub>6</sub>-1,4-(SiMe<sub>3</sub>)<sub>2</sub>}<sub>2</sub> (4Y-1,5) by single-crystal X-ray crystallography. The more soluble main fraction contains Y<sub>2</sub>{μ-η<sup>8</sup>:η<sup>8</sup>-C<sub>8</sub>H<sub>6</sub>-1,4-(SiMe<sub>3</sub>)<sub>2</sub>}<sub>2</sub>{η<sup>8</sup>-C<sub>8</sub>H<sub>6</sub>-1,4-(SiMe<sub>3</sub>)<sub>2</sub>}<sub>2</sub> (4Y-1,4). The X-ray analysis of crystals obtained from the main fraction revealed 1,4-substitution of the central COT'' ring but also a high degree of disorder in the several times recrystallized compound. The <sup>1</sup>H and <sup>13</sup>C NMR spectra clearly

showed the 1,4-substitution of the main fraction. Elemental analysis calcd. for  $C_{42}H_{72}Y_2Si_6$  ( $M_r = 923.4 \text{ g}\cdot\text{mol}^{-1}$ ): C 54.63 %, H 7.86 %; Found: C 54.49 %, H 7.61 %. Mass spectrum (EI):  $m/z$  921 (100 %) [M+], 907 (5 %) [ $Y_2COT''_3 - CH_3$ ], 849 (11 %) [ $Y_2COT''_3 - SiMe_3$ ], 824 (10 %), 673 (3 %) [ $Y_2COT''_2$ ], 601 (25 %) [ $Y_2COT''_2 - SiMe_3$ ], 585 (5 %) [ $YCOT''_2$ ], 501 (20 %), 479 (2 %), 337 (80 %) [ $YCOT''$ ].

#### 4Y-1,4:

Mp.: 234 °C. IR (ATR):  $\nu = 3038w, 2994w, 295 m, 2895w, 1777w, 1666w, 1535w, 1487w, 1444w, 1402m, 1320w, 1243s, 1213m, 1124w, 1047m, 1039m$  (sh), 981m, 937m, 910m, 824vs, 786s (sh), 731vs, 685s, 634s, 549m, 513w, 491m, 434w, 392w, 338s, 309s, 254s, 166m, 118w, 81w  $\text{cm}^{-1}$ .  $^1\text{H}$  NMR (400.1 MHz,  $d_8$ -toluene, 296 K):  $\delta = 6.25$  (s, 4H,  $H^a$ -COT), 6.18 – 6.15 (m, 4H,  $H^c$ -COT), 6.14 (s, 2H,  $H^a$ - $\mu$ -COT), 6.09 - 6.05 (m, 2H,  $H^c$ - $\mu$ -COT), 6.01 – 5.96 (m, 6H,  $H^d$ -COT +  $H^d$ - $\mu$ -COT), 0.65 (s, 18H,  $SiMe_3$ ), 0.46 (s, 36H,  $SiMe_3$ ) ppm.  $^{13}\text{C}$  NMR (100.2 MHz,  $d_8$ -toluene, 296 K):  $\delta = 103.8$  ( $C^b$ -COT), 102.3 ( $C^a$ -COT), 101.5 ( $C^c$ -COT), 99.9 ( $C^d$ -COT), 95.2 ( $C^b$ - $\mu$ -COT), 94.2 ( $C^c$ - $\mu$ -COT), 93.7 ( $C^a$ - $\mu$ -COT), 92.8 ( $C^d$ - $\mu$ -COT), 0.9 ( $SiMe_3$ ), 0.7 ( $SiMe_3$ ) ppm.  $^{29}\text{Si}$  NMR (79.5 MHz,  $d_8$ -toluene, 295 K):  $\delta = 6.17, 4.11$  (1:2) ppm.

#### 4Y-1,5:

Mp.: 305 °C.  $^1\text{H}$  NMR (400.1 MHz,  $d_8$ -THF, 296 K):  $\delta = 6.68$  (s br, 2H,  $H^a$ - $\mu$ -COT), 6.55 (s br, 2H,  $H^a$ - $\mu$ -COT), 6.12 – 6.01 (m, 4H,  $H^c$ -COT), 5.98 (s, 4H,  $H^a$ -COT), 5.90 – 5.87 (m, 4H,  $H^d$ -COT), 5.49 (s br, 2H,  $H^c$ -COT), 0.46 (s, 18H,  $SiMe_3$ ), 0.44 – 0.33 (2 s, 36H,  $SiMe_3$ ) ppm.  $^{13}\text{C}$  NMR (100.2 MHz,  $d_8$ -THF, 296 K):  $\delta = 102.4$  ( $C^b$ - $\mu$ -COT), 101.8 and 101.3 ( $C^a$ - $\mu$ -COT), 99.3 ( $C^c$ -COT), 98.0 ( $C^b$ -COT), 97.5 ( $C^c$ - $\mu$ -COT), 97.2 ( $C^d$ -COT), 97.1 ( $C^a$ -COT), 1.4 ( $SiMe_3$ ), 0.8 – 1.0 ( $SiMe_3$ ) ppm.  $^{29}\text{Si}$  NMR (79.5 MHz,  $d_8$ -THF, 295 K):  $\delta = 4.77, 1.10$  (1:2) ppm.

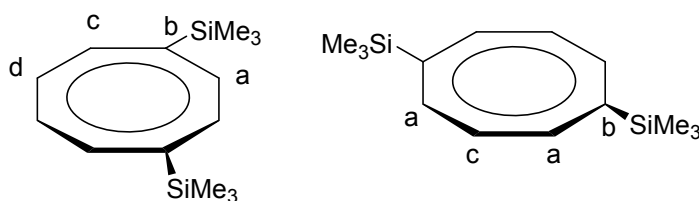

**Scheme S1.** Numbering Scheme of the COT'' rings in the title compounds.

**Synthesis of  $\text{La}_2\{\mu\text{-}\eta^8\text{-C}_8\text{H}_6\text{-1,4-(SiMe}_3)_2\}\{\eta^8\text{-C}_8\text{H}_6\text{-1,4-(SiMe}_3)_2\}_2$  (**4La**)**

From 0.25 g (1.9 mmol) anhydrous  $\text{CoCl}_2$  and 3.5 g (3.78 mmol)  $[\text{Li}(\text{THF})_4][\text{La}\{\text{C}_8\text{H}_6(\text{SiMe}_3)_2\}_2]$  as described for **4Y**. Compound **4La** precipitated at r.t. as pale yellow plates (1.0 g, 52%), which were suitable for X-ray crystallography after recrystallization from toluene. Elemental analysis calcd. for  $\text{C}_{42}\text{H}_{72}\text{La}_2\text{Si}_6$  ( $M_r = 1023.4 \text{ g}\cdot\text{mol}^{-1}$ ): C 49.29 %, H 7.09 %; Found: C 48.97 %, H 7.01 %. Mp.: 172–180 °C dec. IR (ATR):  $\nu = 3030\text{w}, 2994\text{w}, 2951\text{m}, 2892\text{w}, 1528\text{w}, 1488\text{w}, 1445\text{w}, 1403\text{m}, 1309\text{w}, 1243\text{s}, 1211\text{s}, 1152\text{m}, 1046\text{s}, 1036\text{m}, 979\text{m}, 934\text{m}, 908\text{w}, 827\text{vs}, 779\text{m}, 747\text{s}, 731\text{vs}, 684\text{m}, 635\text{s}, 548\text{m}, 513\text{m}, 501\text{m}, 465\text{w}, 446\text{w}, 394\text{w}, 344\text{m}, 300\text{m}, 309\text{s}, 248\text{s}, 229\text{s}, 165\text{m}, 118\text{w}, 84\text{w} \text{ cm}^{-1}$ . Mass spectrum (EI):  $m/z$  1021 (100 %)  $[\text{La}_2\text{COT}^{\text{r}_3} - \text{H}]$ , 1006 (5 %)  $[\text{La}_2\text{COT}^{\text{r}_3} - \text{CH}_3]$ , 949 (3 %)  $[\text{La}_2\text{COT}^{\text{r}_3} - \text{SiMe}_3]$ , 774 (6 %)  $[\text{La}_2\text{COT}^{\text{r}_2}]$ , 759 (1%)  $[\text{La}_2\text{COT}^{\text{r}_2} - \text{CH}_3]$ , 701 (15 %)  $[\text{La}_2\text{COT}^{\text{r}_2} - \text{SiMe}_3]$ , 387 (61 %)  $[\text{La}_2\text{COT}^{\text{r}}]$ .  $^1\text{H}$  NMR (400.1 MHz,  $d_8$ -toluene, 296 K):  $\delta = 6.36$  (s, 4H,  $\text{H}^{\text{a-COT}}$ ), 6.34 – 6.28 (m, 6H,  $\text{H}^{\text{c-COT}} + \text{H}^{\text{a-}\mu\text{-COT}}$ ), 6.27 - 6.55 (m, 2H,  $\text{H}^{\text{c-}\mu\text{-COT}}$ ), 6.22 – 6.16 (m, 6H,  $\text{H}^{\text{d-COT}} + \text{H}^{\text{d-}\mu\text{-COT}}$ ), 0.52 (s, 18H,  $\text{SiMe}_3$ ), 0.39 (s, 36H,  $\text{SiMe}_3$ ) ppm.  $^{13}\text{C}$  NMR (100.2 MHz,  $d_8$ -toluene, 296 K):  $\delta = 108.2$  ( $\text{C}^{\text{b-COT}}$ ), 106.9 ( $\text{C}^{\text{a-COT}}$ ), 106.1 ( $\text{C}^{\text{b-}\mu\text{-COT}}$ ), 105.6 ( $\text{C}^{\text{c-COT}}$ ), 103.8 ( $\text{C}^{\text{d-COT}}$ ), 102.8 ( $\text{C}^{\text{a-}\mu\text{-COT}}$ ), 102.4 ( $\text{C}^{\text{c-}\mu\text{-COT}}$ ), 101.0 ( $\text{C}^{\text{d-}\mu\text{-COT}}$ ), 1.1 ( $\text{SiMe}_3$ ), 0.6 ( $\text{SiMe}_3$ ) ppm.  $^{29}\text{Si}$  NMR (79.5 MHz,  $d_8$ -toluene, 295 K):  $\delta = 5.93, 3.09$  (1:2) ppm.

**Synthesis of  $\text{Tb}_2\{\mu\text{-}\eta^8\text{-C}_8\text{H}_6\text{-1,5-(SiMe}_3)_2\}\{\eta^8\text{-C}_8\text{H}_6\text{-1,4-(SiMe}_3)_2\}_2$  (**4Tb**)**

From 0.21 g (1.60 mmol) anhydrous  $\text{CoCl}_2$  and 3.1 g (3.27 mmol)  $[\text{Li}(\text{THF})_4][\text{Tb}\{\text{C}_8\text{H}_6(\text{SiMe}_3)_2\}_2]$  as described for **4Y**. Compound **4Tb** precipitated at room temperature as yellow crystals (1.2 g, 69%), which were suitable for X-ray crystallography. Elemental analysis calcd. for  $\text{C}_{42}\text{H}_{72}\text{Tb}_2\text{Si}_6$  ( $M_r = 1063.4 \text{ g}\cdot\text{mol}^{-1}$ ): C 47.44 %, H 6.82 %; Found: C 47.19 %, H 6.53 %. Mp.: 187 °C. IR (ATR):  $\nu = 3037\text{w}, 2950\text{m}, 2894\text{w}, 1535\text{vw}, 1488\text{vw}, 1444\text{w}, 1402\text{w}, 1365\text{vw}, 1319\text{vw}, 1243\text{s}, 1215\text{m}, 1047\text{m}, 980\text{m}, 937\text{m}, 910\text{m}, 825\text{vs}, 805\text{s}$  (sh), 782m, 748s (sh), 733vs, 685m, 634m, 549m, 523m, 514m, 497w, 466w, 392m, 378m, 356w, 333m, 326m, 308m, 284w, 242m, 224s, 155m, 126w, 73w  $\text{ cm}^{-1}$ . Mass spectrum (EI,  $m < 1025$ ):  $m/z$  988 (12 %)  $[\text{Tb}_2\text{COT}^{\text{r}_3} - \text{SiMe}_3]$ , 963 (5 %), 862 (15 %), 814 (6 %)  $[\text{Tb}_2\text{COT}^{\text{r}_2}]$ , 799 (3%)  $[\text{Tb}_2\text{COT}^{\text{r}_2} - \text{CH}_3]$ , 741 (40 %)  $[\text{Tb}_2\text{COT}^{\text{r}_2} - \text{SiMe}_3]$ , 668 (3 %)  $[\text{Tb}_2\text{COT}^{\text{r}_2} - \text{SiMe}_3]$ , 655 (7 %)  $[\text{TbCOT}^{\text{r}_2}]$ , 614 (10 %), 555 (8 %), 456 (8 %), 407 (100 %)  $[\text{TbCOT}^{\text{r}}]$ , 391

(10 %) [TbCOT<sup>''</sup> – CH<sub>3</sub>], 333 (25 %) [TbCOT<sup>''</sup> – SiMe<sub>3</sub>]. Meaningful NMR data could not be obtained for **4Tb** due to the strong paramagnetism of the Tb<sup>3+</sup> ion.

**Synthesis of Tm<sub>2</sub>{μ-η<sup>8</sup>:η<sup>8</sup>-C<sub>8</sub>H<sub>6</sub>-1,5-(SiMe<sub>3</sub>)<sub>2</sub>}{η<sup>8</sup>-C<sub>8</sub>H<sub>6</sub>-1,4-(SiMe<sub>3</sub>)<sub>2</sub>}<sub>2</sub> (4Tm)**

From 0.17 g (1.31 mmol) anhydrous CoCl<sub>2</sub> and 2.5 g (2.61 mmol) [Li(THF)<sub>4</sub>][Tm{C<sub>8</sub>H<sub>6</sub>(SiMe<sub>3</sub>)<sub>2</sub>]<sub>2</sub>] as described for **4Y**. Compound **4Tm** precipitated at r.t. as deep red crystals (1.41 g, 67%). Elemental analysis calcd. for C<sub>42</sub>H<sub>72</sub>Si<sub>6</sub>Tm<sub>2</sub> (*M<sub>r</sub>* = 1083.4 g·mol<sup>-1</sup>): C 46.56 %, H 6.70 %; Found: C 46.37%, H 6.42 %. Mp.: 198 °C. IR (ATR):  $\nu$  = 3039w, 2949m, 2894w, 1676vw, 1612vw, 1564vw, 1538vw, 1488vw, 1445w, 1403w, 1366vw, 1342vw, 1318vw, 1242s, 1217m, 1049m, 983s, 938m, 911m, 826vs, 805s (sh), 783m, 760m (sh), 735vs, 685s, 630s, 549m, 522m, 513m, 465w, 391m, 371m, 356w, 325m, 309m, 285w, 241m, 223s, 155m, 102vw, 93vw, 79vw cm<sup>-1</sup>. Mass spectrum (EI, *m* < 1025): *m/z* 1008 (3 %) [Tm<sub>2</sub>COT<sup>''</sup><sub>3</sub> – SiMe<sub>3</sub>], 833 (100 %) [Tm<sub>2</sub>COT<sup>''</sup><sub>2</sub>], 665 (15 %) [TmCOT<sup>''</sup><sub>2</sub>], 592 (3 %) [TmCOT<sup>''</sup><sub>2</sub> – SiMe<sub>3</sub>], 417 (66 %) [TmCOT<sup>''</sup>]. Meaningful NMR data could not be obtained for **4Tm** due to the strong paramagnetism of the Tm<sup>3+</sup> ion.

**Synthesis of Lu<sub>2</sub>{μ-η<sup>4</sup>:η<sup>4</sup>-C<sub>8</sub>H<sub>6</sub>-1,4-(SiMe<sub>3</sub>)<sub>2</sub>}{η<sup>8</sup>-C<sub>8</sub>H<sub>6</sub>-1,4-(SiMe<sub>3</sub>)<sub>2</sub>}<sub>2</sub> (4Lu)**

From 0.47 g (3.6 mmol) CoCl<sub>2</sub> and 7.0 g (7.27 mmol) [Li(THF)<sub>4</sub>][Lu{C<sub>8</sub>H<sub>6</sub>(SiMe<sub>3</sub>)<sub>2</sub>]<sub>2</sub>] as described for **4Y**. Compound **4Lu** precipitated at r.t. as colorless crystals (2.9 g, 72%) which were suitable for X-ray crystallography. Elemental analysis calcd. for C<sub>42</sub>H<sub>72</sub>Lu<sub>2</sub>Si<sub>6</sub> (*M<sub>r</sub>* = 1095.48 g·mol<sup>-1</sup>): C 54.86%, H 7.95%; Found: C 54.59%, H 7.67%. Mp.: 237 °C. IR (KBr disc):  $\nu$  = 3044w, 2953m, 2897w, 1443w, 1403m, 1246vs, 1214m, 1198w, 1049s, 1039s, 983m, 938s, 910m, 825vs, 786s, 733vs, 686s, 635s, 552m, 516w, 491m cm<sup>-1</sup>. Mass spectrum (EI): *m/z* 1020 (20 %) [Lu<sub>2</sub>COT<sup>''</sup><sub>3</sub> – SiMe<sub>3</sub>], 845 (10 %) [Lu<sub>2</sub>COT<sup>''</sup><sub>2</sub>], 773 (25 %) [Lu<sub>2</sub>COT<sup>''</sup><sub>2</sub> – SiMe<sub>3</sub>], 672 (45 %) [LuCOT<sup>''</sup><sub>2</sub>], 599 (10 %), 573 (12 %), 423 (95 %) [LuCOT<sup>''</sup>], 250 (70 %) [COT<sup>''</sup>], 207 (85 %), 176 (95 %) [COT<sup>''</sup> – SiMe<sub>3</sub>], 162 (100 %). <sup>1</sup>H NMR (400.1 MHz, C<sub>6</sub>D<sub>6</sub>, 296 K):  $\delta$  = 6.32 (s, 4H, H<sup>a</sup>-COT), 6.28 (m, 4H, H<sup>c</sup>-COT), 6.10 (m, 2H, H<sup>c</sup>-μ-COT), 5.97 (s, 2H, H<sup>a</sup>-μ-COT), 5.91 (m, 4H, H<sup>d</sup>-COT), 5.71 (m, 2H, H<sup>d</sup>-μ-COT); 0.53 (s, 18H, SiMe<sub>3</sub>), 0.46 (s, 36H, SiMe<sub>3</sub>) ppm. <sup>13</sup>C NMR (100.2 MHz, C<sub>6</sub>D<sub>6</sub>, 296 K):  $\delta$  = 100.7 (C<sup>b</sup>-COT), 100.1 (C<sup>a</sup>-COT), 98.6 (C<sup>c</sup>-COT), 98.2 (C<sup>b</sup>-μ-COT), 97.2 (C<sup>d</sup>-COT + C<sup>c</sup>-μ-COT), 94.9 (C<sup>d</sup>-μ-COT), 94.7 (C<sup>a</sup>-μ-COT), 0.9 (SiMe<sub>3</sub>) ppm. <sup>29</sup>Si NMR (79.5 MHz, C<sub>6</sub>D<sub>6</sub>, 295 K):  $\delta$  = 4.98, 2.42 (2:1) ppm.

2.  $^{13}\text{C}$  NMR spectra for **4Y**, **4La** and **4Lu**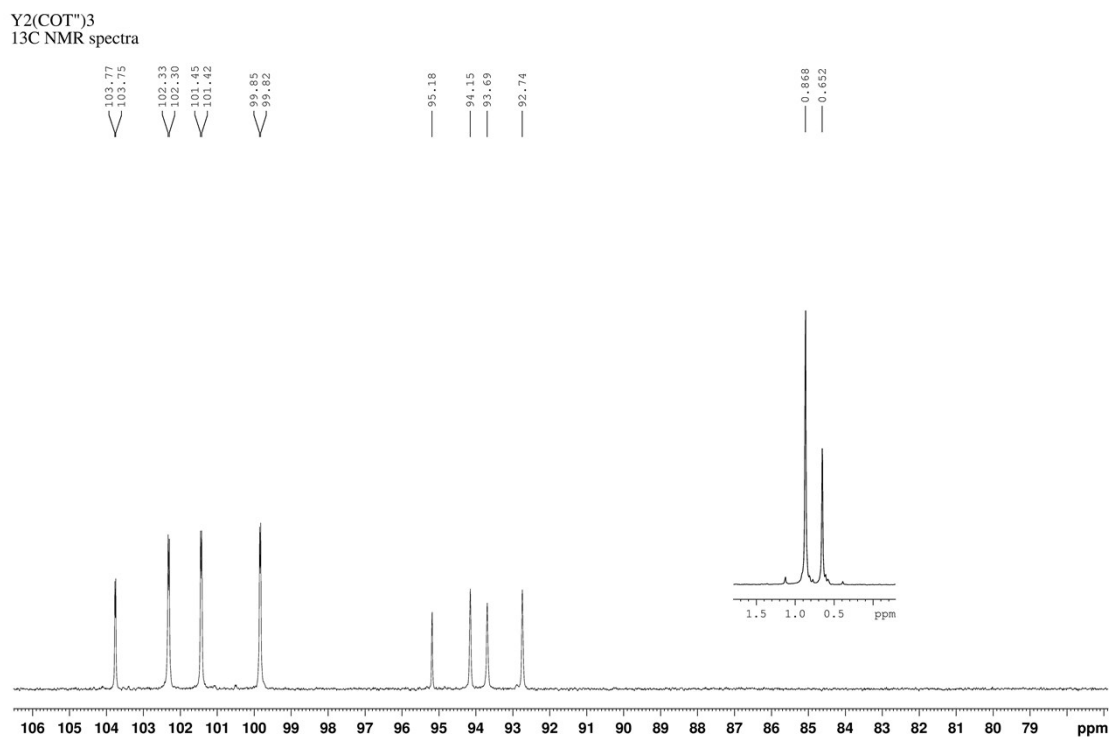

**Figure S1.**  $^{13}\text{C}$  NMR spectrum of  $\text{Y}_2\{\mu\text{-}\eta^8\text{:}\eta^8\text{-C}_8\text{H}_6\text{-1,4-(SiMe}_3)_2\}\{\eta^8\text{-C}_8\text{H}_6\text{-1,4-(SiMe}_3)_2\}_2$  (**4Y-1,4**) in  $d_8$ -toluene.

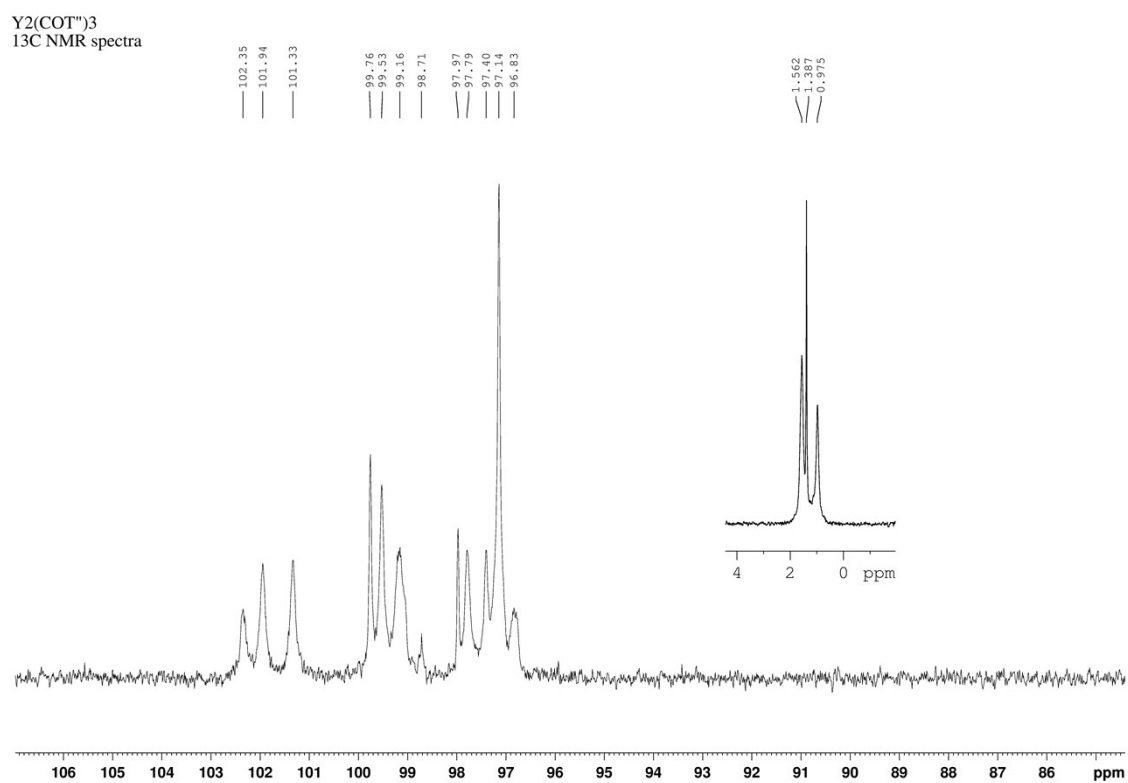

**Figure S2.** <sup>13</sup>C NMR spectrum of Y<sub>2</sub>{μ-η<sup>8</sup>:η<sup>8</sup>-C<sub>8</sub>H<sub>6</sub>-1,5-(SiMe<sub>3</sub>)<sub>2</sub>}{η<sup>8</sup>-C<sub>8</sub>H<sub>6</sub>-1,4-(SiMe<sub>3</sub>)<sub>2</sub>}<sub>2</sub> (**4Y-1,5**) in d<sub>8</sub>-THF.



La<sub>2</sub>(COT<sup>'''</sup>)<sub>3</sub>  
13C NMR spectra

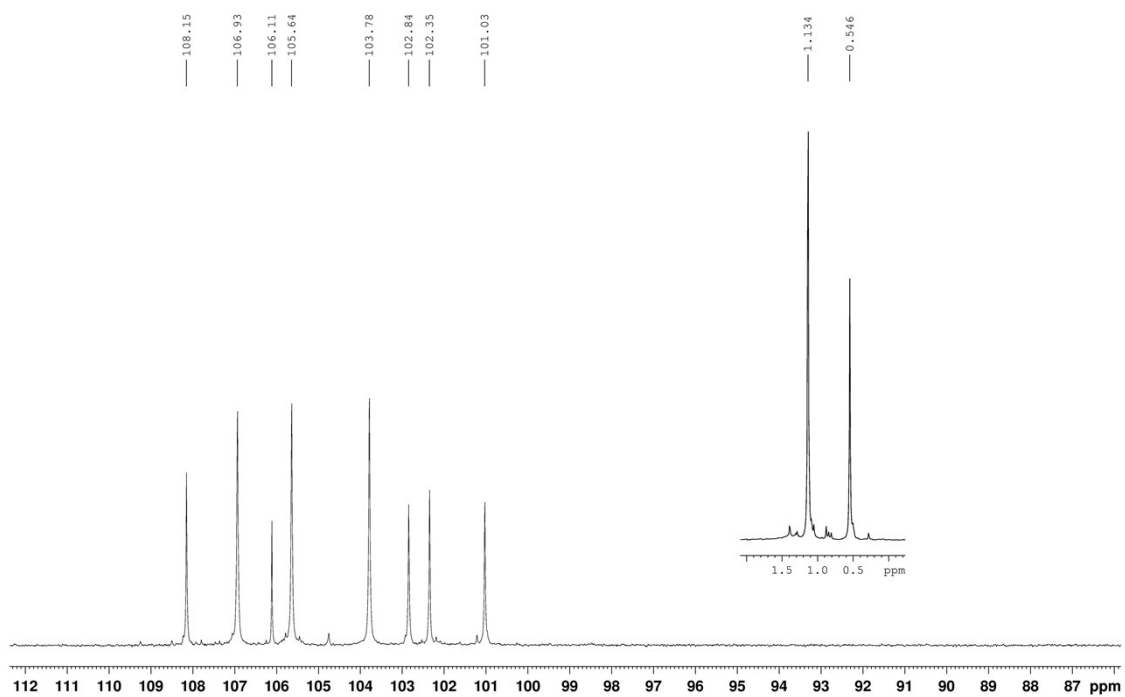

**Figure S3.** <sup>13</sup>C NMR spectrum of La<sub>2</sub>{μ-η<sup>8</sup>:η<sup>8</sup>-C<sub>8</sub>H<sub>6</sub>-1,4-(SiMe<sub>3</sub>)<sub>2</sub>}{η<sup>8</sup>-C<sub>8</sub>H<sub>6</sub>-1,4-(SiMe<sub>3</sub>)<sub>2</sub>}<sub>2</sub> (**4La**) in d<sub>8</sub>-toluene.

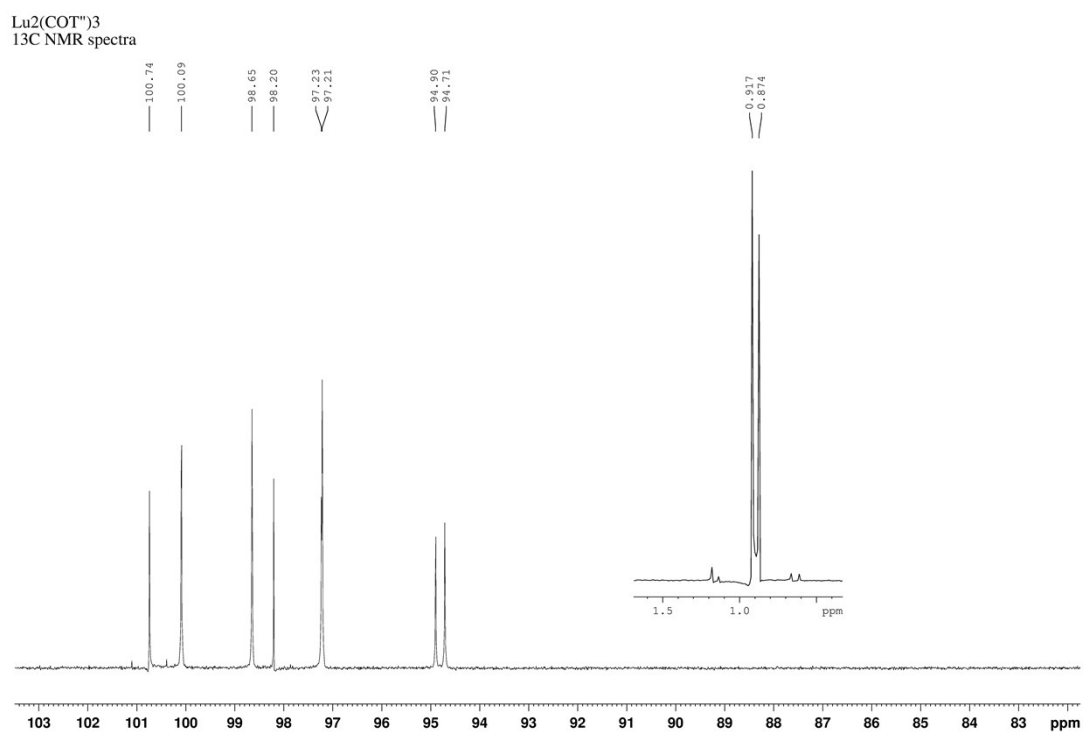

**Figure S4.** <sup>13</sup>C NMR spectrum of Lu<sub>2</sub>{ $\mu$ - $\eta^4$ : $\eta^4$ -C<sub>8</sub>H<sub>6</sub>-1,4-(SiMe<sub>3</sub>)<sub>2</sub>}{ $\eta^8$ -C<sub>8</sub>H<sub>6</sub>-1,4-(SiMe<sub>3</sub>)<sub>2</sub>}<sub>2</sub> (**4Lu**) in C<sub>6</sub>D<sub>6</sub>.

### 3. Supporting NMR experiments

Additional NMR experiments have been carried out in order to either establish or rule out an interconversion of isolated triple-decker complexes in solution.

a) In the case of  $\text{La}_2\{\mu\text{-}\eta^8\text{:}\eta^8\text{-C}_8\text{H}_6\text{-1,4-(SiMe}_3)_2\}\{\eta^8\text{-C}_8\text{H}_6\text{-1,4-(SiMe}_3)_2\}_2$  (**4La**), the crude reaction mixture has been checked by  $^{13}\text{C}$  NMR before and after recrystallization. After the reaction, the by-products LiCl and metallic Co were removed by filtration and the filtrate was evaporated to dryness. At this stage the  $^{13}\text{C}$  NMR spectrum of the remaining solid was not interpretable due to the presence of Co-containing paramagnetic contaminations. Washing with *n*-pentane and crystallization from toluene gave a high yield of **4La**. The  $^{13}\text{C}$  NMR spectrum (Figure S5) at this stage showed the exclusive formation of the 1,4-isomer (**4La-1,4**) and no indication of the presence of a putative 1,5-isomer.

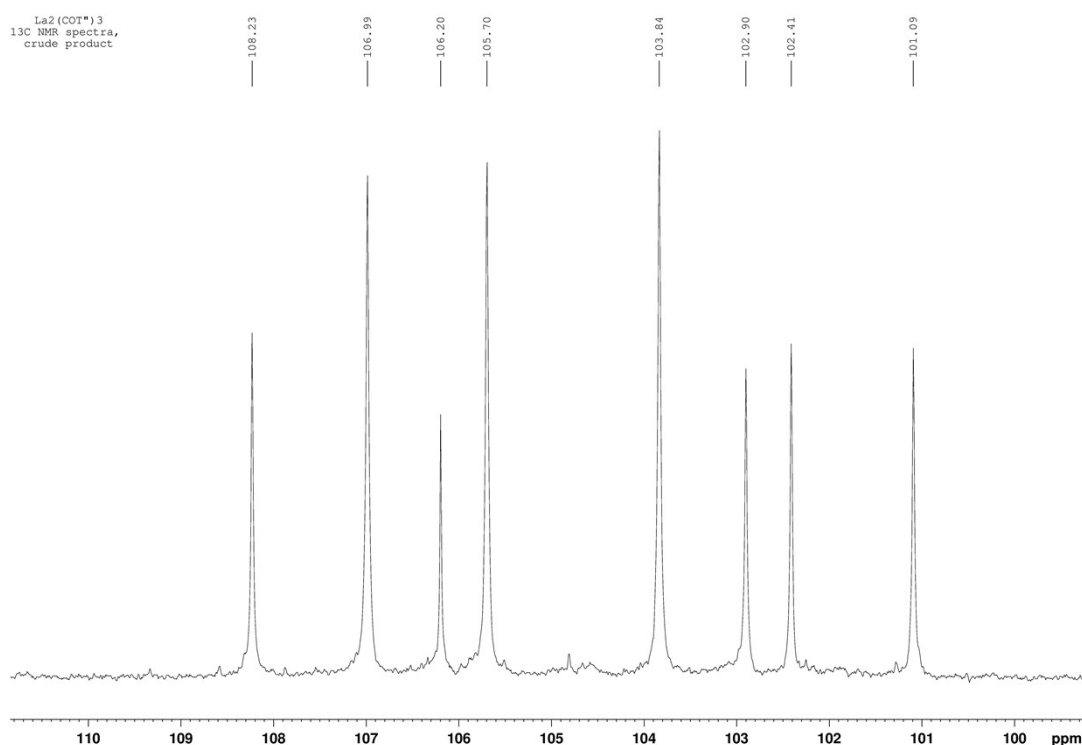

**Figure S5.**  $^{13}\text{C}$  NMR spectrum of "crude"  $\text{La}_2\{\mu\text{-}\eta^8\text{:}\eta^8\text{-C}_8\text{H}_6\text{-1,4-(SiMe}_3)_2\}\{\eta^8\text{-C}_8\text{H}_6\text{-1,4-(SiMe}_3)_2\}_2$  (**4La-1,4**) (COT" ring region).

b) A high-temperature  $^{13}\text{C}$  NMR study of pure  $\text{Y}_2\{\mu\text{-}\eta^8\text{:}\eta^8\text{-C}_8\text{H}_6\text{-1,4-(SiMe}_3)_2\}\{\eta^8\text{-C}_8\text{H}_6\text{-1,4-(SiMe}_3)_2\}_2$  (**4Y-1,4**) in  $d_8$ -toluene up to 343 K revealed no sign of conversion to **4Y-1,5** in solution (only some line broadening, *cf.* Figure S6). In a second experiment, a sample of pure  $\text{Y}_2\{\mu\text{-}\eta^8\text{:}\eta^8\text{-C}_8\text{H}_6\text{-1,4-(SiMe}_3)_2\}\{\eta^8\text{-C}_8\text{H}_6\text{-1,4-(SiMe}_3)_2\}_2$  (**4Y-1,4**) was refluxed in toluene solution for several hours. Once again, the  $^{13}\text{C}$  NMR spectrum measured after evaporation of the solvent showed only unchanged **4Y-1,4**. After all, the additional NMR experiments clearly indicated that the different isomers of the triple-deckers **4Ln** are formed during the redox reaction of the anionic sandwich complexes with  $\text{CoCl}_2$  and not within the isolated triple-decker complexes.

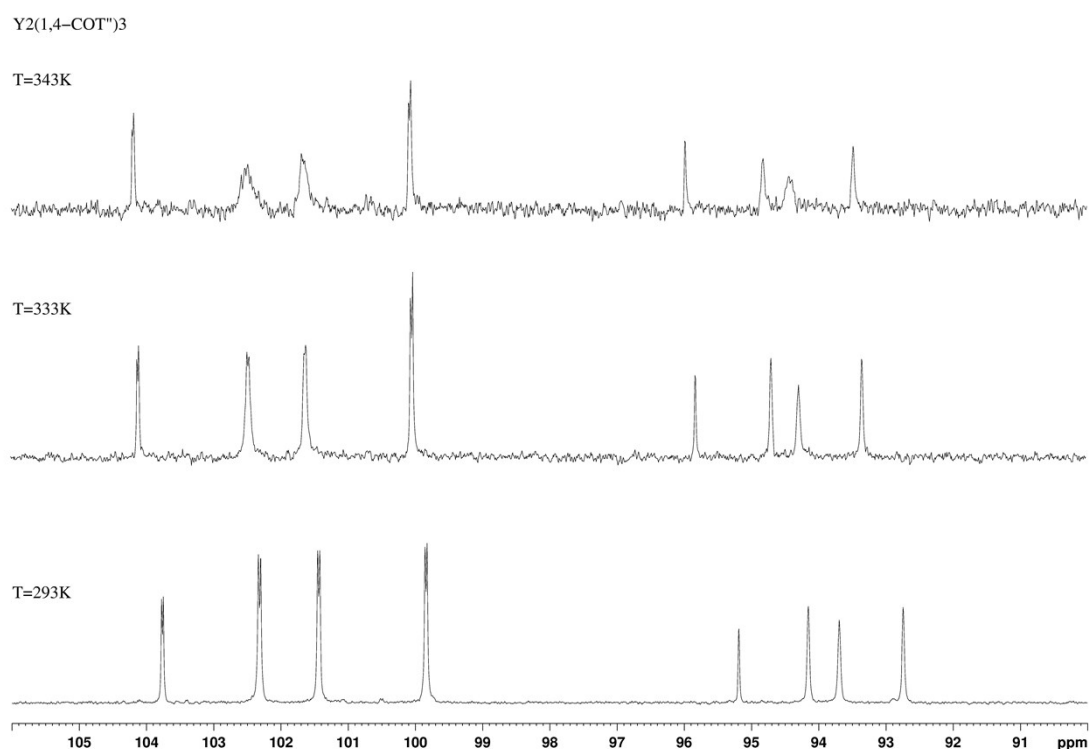

**Figure S6.** High-temperature  $^{13}\text{C}$  NMR spectra of  $\text{Y}_2\{\mu\text{-}\eta^8\text{:}\eta^8\text{-C}_8\text{H}_6\text{-1,4-(SiMe}_3)_2\}\{\eta^8\text{-C}_8\text{H}_6\text{-1,4-(SiMe}_3)_2\}_2$  (**4Y-1,4**) in  $d_8$ -toluene (COT'' ring region).

#### 4. X-Ray crystallographic data for **4Y**, **4La**, **4Tb**, **4Tm**, and **4Lu**

**X-ray crystallographic studies:** Single crystal X-ray intensity data of **4Y**, **4La**, **4Tb**, **4Tm**, and **4Lu** were collected on a STOE IPDS 2T diffractometer equipped with a 34 cm image plate detector at  $T = 153(2)$  K, using graphite-monochromated Mo- $K_{\alpha}$  radiation. Crystallographic data for the structure reported in this paper have been deposited at the CCDC, 12 Union Road, Cambridge CB21EZ, UK. Copies of the data can be obtained free of charge on quoting the depository numbers 1839498–1839503 (*cf.* Table S1) (Fax: +44-1223-336-033; E-Mail: [deposit@ccdc.cam.ac.uk](mailto:deposit@ccdc.cam.ac.uk), <http://www.ccdc.cam.ac.uk>).

**Table S1.** Crystallographic data for all known tripledecker complexes Ln<sub>2</sub>(COT<sup>III</sup>)<sub>3</sub>

| Compound                                              | Sc <sub>2</sub> (COT <sup>III</sup> ) <sub>3</sub><br>(4Sc)     | Y <sub>2</sub> (COT <sup>III</sup> ) <sub>3</sub><br>(4Y)                    | La <sub>2</sub> (COT <sup>III</sup> ) <sub>3</sub><br>(4La)                                  | Nd <sub>2</sub> (COT <sup>III</sup> ) <sub>3</sub><br>(4Nd)     | Gd <sub>2</sub> (COT <sup>III</sup> ) <sub>3</sub><br>(4Gd)     | Tb <sub>2</sub> (COT <sup>III</sup> ) <sub>3</sub><br>(4Tb)     | Dy <sub>2</sub> (COT <sup>III</sup> ) <sub>3</sub><br>(4Dy)     | Ho <sub>2</sub> (COT <sup>III</sup> ) <sub>3</sub><br>(4Ho)     | Er <sub>2</sub> (COT <sup>III</sup> ) <sub>3</sub><br>(4Er)     | Tm <sub>2</sub> (COT <sup>III</sup> ) <sub>3</sub><br>(4Tm)     | Lu <sub>2</sub> (COT <sup>III</sup> ) <sub>3</sub><br>(4Lu)     |
|-------------------------------------------------------|-----------------------------------------------------------------|------------------------------------------------------------------------------|----------------------------------------------------------------------------------------------|-----------------------------------------------------------------|-----------------------------------------------------------------|-----------------------------------------------------------------|-----------------------------------------------------------------|-----------------------------------------------------------------|-----------------------------------------------------------------|-----------------------------------------------------------------|-----------------------------------------------------------------|
| Central COT <sup>III</sup> ring                       | 1,4<br>non-planar                                               | 1,5<br>planar                                                                | 1,4<br>planar                                                                                | 1,4<br>planar                                                   | 1,4<br>planar                                                   | 1,5<br>planar                                                   | 1,4<br>planar                                                   | 1,5<br>planar                                                   | 1,4<br>planar                                                   | 1,5<br>planar                                                   | 1,4<br>non-planar                                               |
| Solvent used for crystallization                      | Toluene/ <i>n</i> -pentane                                      | Toluene/ <i>n</i> -pentane                                                   | Toluene/ <i>n</i> -pentane                                                                   | Cyclopentane                                                    | Cyclopentane                                                    | Toluene/ <i>n</i> -pentane                                      | Cyclopentane                                                    | Cyclopentane                                                    | Cyclopentane                                                    | Toluene/ <i>n</i> -pentane                                      | Toluene/ <i>n</i> -pentane                                      |
| Publication                                           | Angew. Chem. Int. Ed. 2017, 56, 7238–7241                       | <b>this work</b>                                                             | <b>this work</b>                                                                             | OM 2010, 29, 4787 -                                             | JACS 2013, 135, 3502 - 3510                                     | <b>this work</b>                                                | JACS 2013, 135, 3502 - 3510                                     | OM 2013, 32, 1435 – 1444                                        | JACS 2014, 136, 8003-8010                                       | <b>this work</b>                                                | <b>this work</b>                                                |
| Subst. identifier / CCDC                              | li0180 / 1537968                                                | fe109 / 1839500                                                              | fe0160 / 1839501                                                                             | ip33 / 740282                                                   | 863405                                                          | fe0044 / 1839502                                                | 938031                                                          | ip169 / 1839499                                                 | 974992                                                          | fe0094 / 1839503                                                | li0238 / 1839498                                                |
| M-M intramol. dist. (Å)                               | 4.60, η <sup>4</sup> /η <sup>8</sup><br>non-linear              | 4.14, η <sup>8</sup> /η <sup>8</sup><br>4.12, η <sup>8</sup> /η <sup>8</sup> | 4.4746(17)<br>η <sup>8</sup> /η <sup>8</sup><br>4.4631(17)<br>η <sup>8</sup> /η <sup>8</sup> | 4.32, η <sup>8</sup> /η <sup>8</sup>                            | 4.21, η <sup>8</sup> /η <sup>8</sup>                            | 4.2012(8)<br>4.1417(8)                                          | 4.14 η <sup>8</sup> /η <sup>8</sup>                             | 4.127(1)<br>4.095(1)                                            | 4.11 η <sup>8</sup> /η <sup>8</sup>                             | 4.044(1)<br>4.036(1)<br>4.087(1)<br>4.065(1)                    | 4.58, η <sup>4</sup> /η <sup>8</sup><br>non-linear              |
| Average C <sub>cot<sup>III</sup>(cent.)</sub> – M (Å) | 1.52 outer                                                      | 1.751 outer<br>2.067 inner                                                   | 1.955 outer<br>2.239 inner                                                                   | 1.894 outer<br>2.164 inner                                      | 1.81                                                            | 1.784, 1.798<br>outer<br>2.101, 2.071<br>inner                  | 1.79 outer<br>2.07 inner                                        | 1.751 outer<br>2.048 inner                                      | 1.76 outer<br>2.06 inner                                        | 1.717 outer<br>2.029 inner                                      | 1.65 outer                                                      |
| M <sub>r</sub> (g/mol)                                | 835.45                                                          | 923.35                                                                       | 1016.29                                                                                      | 1034.02                                                         | 1060.04                                                         | 1063.37                                                         | 1070.54                                                         | 1075.40                                                         | 1080.06                                                         | 1083.39                                                         | 1095.47                                                         |
| Formula                                               | C <sub>42</sub> H <sub>72</sub> Sc <sub>2</sub> Si <sub>6</sub> | C <sub>42</sub> H <sub>72</sub> Si <sub>6</sub> Y <sub>2</sub>               | C <sub>42</sub> H <sub>72</sub> La <sub>2</sub> Si <sub>6</sub>                              | C <sub>42</sub> H <sub>72</sub> Nd <sub>2</sub> Si <sub>6</sub> | C <sub>42</sub> H <sub>72</sub> Gd <sub>2</sub> Si <sub>6</sub> | C <sub>42</sub> H <sub>72</sub> Si <sub>6</sub> Tb <sub>2</sub> | C <sub>42</sub> H <sub>72</sub> Dy <sub>2</sub> Si <sub>6</sub> | C <sub>42</sub> H <sub>72</sub> Ho <sub>2</sub> Si <sub>6</sub> | C <sub>42</sub> H <sub>72</sub> Er <sub>2</sub> Si <sub>6</sub> | C <sub>42</sub> H <sub>72</sub> Si <sub>6</sub> Tm <sub>2</sub> | C <sub>42</sub> H <sub>72</sub> Lu <sub>2</sub> Si <sub>6</sub> |
| Crystal system                                        | orthorhombic                                                    | triclinic                                                                    | monoclinic                                                                                   | monoclinic                                                      | tetragonal                                                      | monoclinic                                                      | tetragonal                                                      | triclinic                                                       | tetragonal                                                      | triclinic                                                       | monoclinic                                                      |
| Space group                                           | <i>Pna</i> 2 <sub>1</sub>                                       | <i>P</i> 1̄                                                                  | <i>P</i> 2 <sub>1</sub>                                                                      | <i>P</i> 2 <sub>1</sub> / <i>n</i>                              | <i>I</i> 4̄                                                     | <i>P</i> 2 <sub>1</sub> / <i>n</i>                              | <i>I</i> 4̄                                                     | <i>P</i> 1̄                                                     | <i>I</i> 4̄                                                     | <i>P</i> 1̄                                                     | <i>P</i> 2 <sub>1</sub> / <i>c</i>                              |
| a (Å)                                                 | 18.699(1)                                                       | 11.761(8)                                                                    | 11.700(10)                                                                                   | 13.2914(3)                                                      | 16.9774(4)                                                      | 20.141(4)                                                       | 16.8867(5)                                                      | 11.800(2)                                                       | 16.8620(4)                                                      | 13.092(3)                                                       | 9.8651(3)                                                       |
| b (Å)                                                 | 9.9964(4)                                                       | 13.119(6)                                                                    | 20.285(6)                                                                                    | 17.2442(3)                                                      | 16.9774(4)                                                      | 12.664(3)                                                       | 16.8867(5)                                                      | 13.130(3)                                                       | 16.8620(4)                                                      | 18.108(6)                                                       | 39.2173(9)                                                      |
| c (Å)                                                 | 50.518(2)                                                       | 15.744(8)                                                                    | 20.741(15)                                                                                   | 17.2442(3)                                                      | 20.0097(6)                                                      | 20.822(4)                                                       | 20.1512(6)                                                      | 15.747(3)                                                       | 20.2149(5)                                                      | 20.921(5)                                                       | 12.3474(4)                                                      |
| α (°)                                                 | 90                                                              | 87.01(4)                                                                     | 90.00                                                                                        | 90.00                                                           | 90.00                                                           | 90.00                                                           | 90.00                                                           | 87.29(3)                                                        | 90.00                                                           | 73.62(2)                                                        | 90.00                                                           |
| β (°)                                                 | 90                                                              | 81.33(5)                                                                     | 94.16(7)                                                                                     | 102.6801(15)                                                    | 90.00                                                           | 116.070(13)                                                     | 90.00                                                           | 81.26(3)                                                        | 90.00                                                           | 86.14(2)                                                        | 92.598(3)                                                       |
| γ (°)                                                 | 90                                                              | 86.58(5)                                                                     | 90.00                                                                                        | 90.00                                                           | 90.00                                                           | 90.00                                                           | 90.00                                                           | 86.64(3)                                                        | 90.00                                                           | 89.80(2)                                                        | 90.00                                                           |
| V (Å <sup>3</sup> )                                   | 9442.9(8)                                                       | 2395(2)                                                                      | 4910(6)                                                                                      | 5445.65(18)                                                     | 5767.44(26)                                                     | 4770.6(17)                                                      | 5746.3(3)                                                       | 2405.4(8)                                                       | 5747.6(3)                                                       | 4747(2)                                                         | 4772.1(2)                                                       |
| Density ρ <sub>calcd</sub> (g cm <sup>-3</sup> )      | 1.175                                                           | 1.280                                                                        | 1.375                                                                                        | 1.261                                                           | 1.221                                                           | 1.481                                                           | 1.237                                                           | 1.485                                                           | 1.248                                                           | 1.516                                                           | 1.525                                                           |
| Z                                                     | 8                                                               | 2                                                                            | 4                                                                                            | 4                                                               | 4                                                               | 4                                                               | 4                                                               | 2                                                               | 8                                                               | 4                                                               | 4                                                               |
| Reflec. collected                                     | 35180                                                           | 19151                                                                        | 49861                                                                                        | 45485                                                           | 42421                                                           | 48052                                                           | 42231                                                           | 20858                                                           | 28967                                                           | 39793                                                           | 24021                                                           |
| R(int)                                                | 15853, 0.0871                                                   | 8737, 0.0917                                                                 | 33493                                                                                        | 11009, 0.0819                                                   | 7120, 0.0170                                                    | 12657,                                                          | 7115, 0.0396                                                    | 9741, 0.0763                                                    |                                                                 | 15761                                                           | 8445, 0.0423                                                    |
| Final R<br>[>2σ(I)] R <sub>1</sub>                    | 0.1048                                                          | 0.0669                                                                       | 0.0381                                                                                       | 0.0394                                                          | 0.0256                                                          | 0.0286                                                          | 0.0324                                                          | 0.0583                                                          | 0.0277                                                          | 0.0572                                                          | 0.0397                                                          |
| wR <sub>2</sub>                                       | 0.1776                                                          | 0.1544,<br>0.1432                                                            | 0.1331                                                                                       | 0.0949                                                          | 0.0755                                                          | 0.0609                                                          | 0.0827                                                          | 0.0906                                                          | 0.0630                                                          | 0.1514,<br>0.1429                                               | 0.0661                                                          |
| Crystal color /shape/size                             | Light yellow plates / 0.30 x 0.20 x 0.02                        | Yellow plates / 0.20 x 0.15 x 0.08                                           | Colorless plates                                                                             | Green prisms/ 0.30 x 0.20 x 0.10                                | Orange blocks / 0.16 x 0.16 x 0.18                              | Orange blocks / 0.20 x 0.20 x 0.20                              | Orange blocks / 0.11 x 0.13 x 0.15                              | Orange prisms / 0.14 x 0.10 x 0.08                              | Orange blocks                                                   | Red prisms 0.16 x 0.10 x 0.07                                   | Colorless prisms / 0.41 x 0.25 x 0.16                           |

## STRUCTURE REPORT for 4Y-1,5

Crystallographer: F. Engelhardt

ID code: fe0109

Date: 1.11.2017

Sample by: Volker Lorenz/Janek Rausch

Compound:  $Y_2(COT'')_3$  (**4Y-1,5**)

$Y_2\{\mu-\eta^8:\eta^8-C_8H_6-1,5-(SiMe_3)_2\}\{\eta^8-C_8H_6-1,4-(SiMe_3)_2\}_2$

Formula sum:  $C_{42}H_{72}Si_6Y_2$

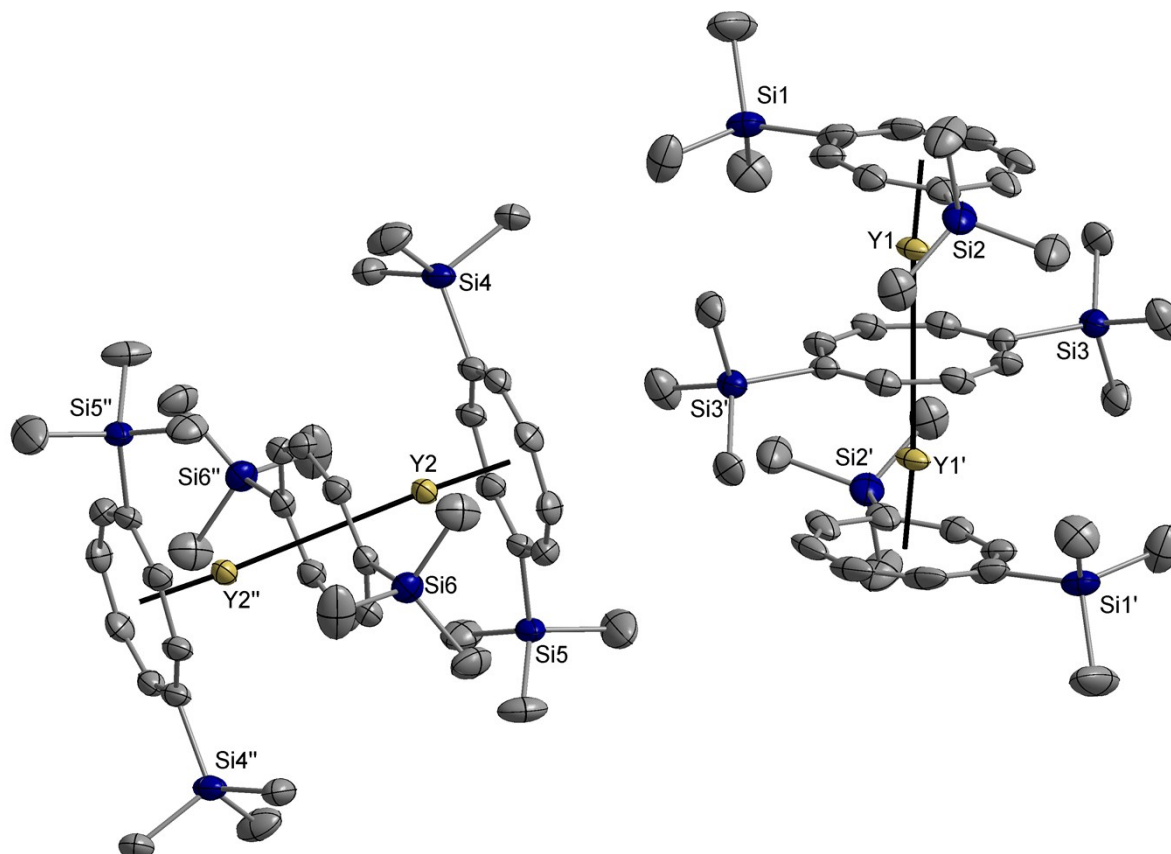

**Figure S7.** Molecular structure of **4Y-1,5** in the crystalline state. Displacement ellipsoids of the heavier atoms with 40% probability, H atoms and disorder of the  $SiMe_3$  moieties omitted for clarity.

**Table S2.** Crystallographic Data and Details on Structure Refinement of **4Y-1,5**

|                                                                      |                                                    |
|----------------------------------------------------------------------|----------------------------------------------------|
| formula sum                                                          | $C_{42}H_{72}Si_6Y_2$                              |
| formula weight                                                       | 1846.70                                            |
| crystal size (mm)                                                    | 0.20 x 0.15 x 0.08 mm                              |
| crystal system                                                       | Triclinic                                          |
| space group                                                          | $P\bar{1}$                                         |
| unit cell parameters                                                 |                                                    |
| <i>a</i> (Å)                                                         | 11.761(8)                                          |
| <i>b</i> (Å)                                                         | 13.119(6)                                          |
| <i>c</i> (Å)                                                         | 15.744(8)                                          |
| $\alpha$ (deg)                                                       | 87.01(4)                                           |
| $\beta$ (deg)                                                        | 81.33(5)                                           |
| $\gamma$ (deg)                                                       | 86.58(5)                                           |
| unit cell volume <i>V</i> (Å <sup>3</sup> )                          | 2395(2)                                            |
| molecules per cell <i>z</i>                                          | 1                                                  |
| crystallographic density $\rho_{\text{calcd}}$ (g cm <sup>-3</sup> ) | 1.280                                              |
| absorption coefficient $\mu$ (mm <sup>-1</sup> )                     | 2.588                                              |
| diffractometer                                                       | STOE IPDS 2T                                       |
| radiation ( $\lambda$ [Å])                                           | graphite-monochromated Mo-K $\alpha$ (0.71073)     |
| temperature (°C)                                                     | -173.15                                            |
| scan type                                                            | $\omega$ scan (increment 1.5°, exposure 1 min)     |
| completeness of dataset                                              | 99.5%                                              |
| $\theta$ range of data collection (deg)                              | 1.754 to 25.446                                    |
| reflections collected                                                | 19151                                              |
| independent reflections                                              | 8737                                               |
| independent reflections with $I > 2\sigma(I)$                        | 6643                                               |
| structure solution method                                            | dual-space structure solution (SHELXT)             |
| refinement method                                                    | full-matrix least-squares on $F^2$ (SHELXL 2016/4) |
| absorption correction method                                         | Numerical                                          |
| range of transmission factors                                        | 0.8293 and 0.6043                                  |
| data / parameters / restraints                                       | 8737 / 596 / 1698                                  |
| goodness of fit (GooF) [all data]                                    | 1.099                                              |
| final <i>R</i> values                                                |                                                    |
| $R_1$ [all data, $I \geq 2\sigma(I)$ ]                               | 0.0917, 0.0669                                     |
| $wR_2$ [all data, $I \geq 2\sigma(I)$ ]                              | 0.1544, 0.1432                                     |
| largest difference peak and hole                                     | 1.587 and -0.830 eÅ <sup>-3</sup>                  |

Refinement special details:

Large residual density peaks due to inefficient absorption correction.



**STRUCTURE REPORT for 4Y-1,4**

**Crystallographer:** F. Engelhardt  
**ID code:** fe0240  
**Date:** 01.11.2017  
**Sample by:** Volker Lorenz/Janek Rausch  
**Compound:**  $Y_2(COT'')_3$  (**4Y-1,4**)  
 $Y_2\{\eta^8-C_8H_6-1,4-(SiMe_3)_2\}_3$   
**Formula sum:**  $C_{126}H_{215}Si_{18}Y_6$

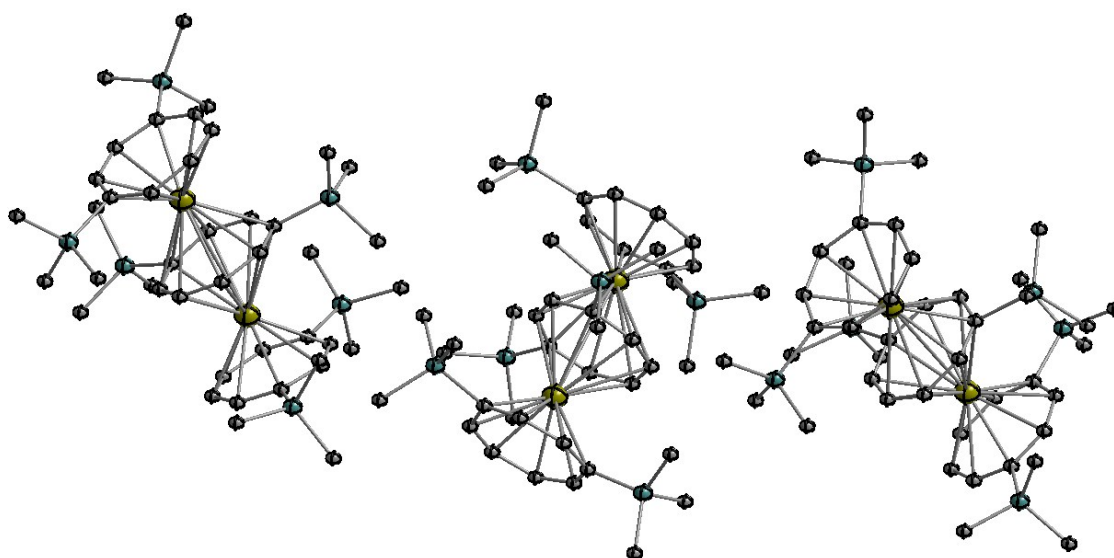

**Figure S8.** Molecular structure of the title compound in the crystalline state. Atoms drawn at arbitrary size, H atoms omitted for clarity.

**Table S3. Crystallographic Data and Details on Structure Refinement of 4Y-1,4**

|                                                            |                                                             |
|------------------------------------------------------------|-------------------------------------------------------------|
| formula sum                                                | $C_{126} H_{215} Si_{18} Y_6$                               |
| formula weight                                             | 2769.05                                                     |
| crystal size (mm)                                          | 0.03 x 0.04 x 0.05 mm                                       |
| crystal system                                             | orthorhombic                                                |
| space group                                                | $Pca2_1$                                                    |
| unit cell parameters                                       |                                                             |
| a (Å)                                                      | 22.405(13)                                                  |
| b (Å)                                                      | 19.758(11)                                                  |
| c (Å)                                                      | 32.899(16)                                                  |
| $\alpha$ (deg)                                             | 90                                                          |
| $\beta$ (deg)                                              | 90                                                          |
| $\gamma$ (deg)                                             | 90                                                          |
| unit cell volume V (Å <sup>3</sup> )                       | 14564(14)                                                   |
| molecules per cell z                                       | 4                                                           |
| crystallographic density $\mu$ calcd (g cm <sup>-3</sup> ) | 1.263                                                       |
| absorption coefficient $\mu$ (mm <sup>-1</sup> )           | 2.553                                                       |
| diffractometer                                             | STOE IPDS 2T                                                |
| radiation ( $\lambda$ [Å])                                 | graphite-monochromated Mo-K $\alpha$ (0.71073)              |
| temperature (°C)                                           | -173.15                                                     |
| scan type                                                  | $\omega$ scan (increment 1.5°, exposure 1 min)              |
| completeness of dataset                                    | 0.725%                                                      |
| $\theta$ range of data collection (deg)                    | 2.090 to 25.349                                             |
| reflections collected                                      | 15610                                                       |
| independent reflections                                    | 12540                                                       |
| independent reflections with $I > 2\sigma(I)$              | 6490                                                        |
| structure solution method                                  | dual-space structure solution (SHELXT)                      |
| refinement method                                          | full-matrix least-squares on F <sup>2</sup> (SHELXL 2016/4) |
| absorption correction method                               | none                                                        |
| data / parameters / restraints                             | 12540 / 602 / 3776                                          |
| goodness of fit (GooF) [all data]                          | 1.261                                                       |
| final R values                                             |                                                             |
| R1 [all data, $I \geq 2\sigma(I)$ ]                        | 0.2611, 0.1872                                              |
| wR2 [all data, $I \geq 2\sigma(I)$ ]                       | 0.4750, 0.4306                                              |
| largest difference peak and hole                           | 6.582 and -1.848 eÅ <sup>-3</sup>                           |

Refinement special details:  
poor data quality

**STRUCTURE REPORT for 4La**

**Crystallographer:** F. Engelhardt  
**ID code:** fe0160  
**Date:** 25.04.2018  
**Sample by:** Volker Lorenz  
**Compound:**  $\text{La}_2(\text{COT}^{\text{''}})_3$  (**4La**)  
 $\text{La}_2\{\mu\text{-}\eta^8\text{:}\eta^8\text{-C}_8\text{H}_6\text{-1,4-(SiMe}_3)_2\}\{\eta^8\text{-C}_8\text{H}_6\text{-1,4-(SiMe}_3)_2\}_2$   
**Formula sum:**  $\text{C}_{42}\text{H}_{72}\text{La}_2\text{Si}_6$

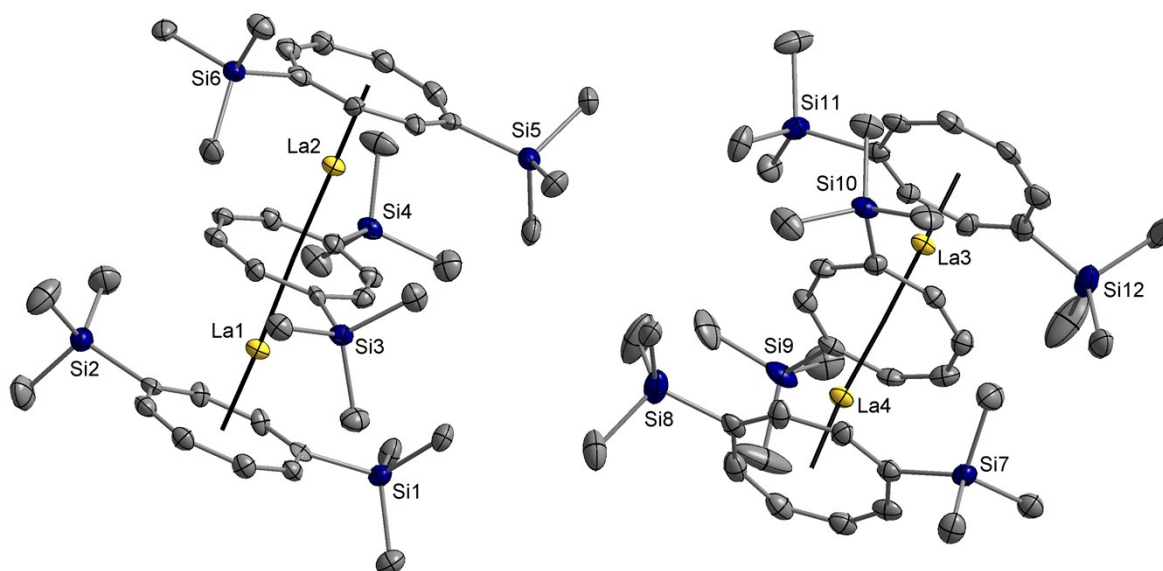

**Figure S9.** Molecular structure of **4La** in the crystalline state. Displacement ellipsoids of the heavier atoms with 50% probability, H atoms omitted for clarity.

**Table S4.** Crystallographic Data and Details on Structure Refinement of **4La**

|                                                        |                                                                 |
|--------------------------------------------------------|-----------------------------------------------------------------|
| formula sum                                            | C <sub>42</sub> H <sub>72</sub> La <sub>2</sub> Si <sub>6</sub> |
| formula weight                                         | 1023.35                                                         |
| crystal size (mm)                                      | 0.09 x 0.15 x 0.21 mm                                           |
| crystal system                                         | monoclinic                                                      |
| space group                                            | <i>P</i> 2 <sub>1</sub>                                         |
| unit cell parameters                                   |                                                                 |
| a (Å)                                                  | 11.747(5)                                                       |
| b (Å)                                                  | 20.280(4)                                                       |
| c (Å)                                                  | 20.734(8)                                                       |
| α (deg)                                                | 90                                                              |
| β (deg)                                                | 94.11(3)                                                        |
| γ (deg)                                                | 90                                                              |
| unit cell volume <i>V</i> (Å <sup>3</sup> )            | 4927(3)                                                         |
| molecules per cell <i>z</i>                            | 4                                                               |
| crystallographic density ρ calcd (g cm <sup>-3</sup> ) | 1.384                                                           |
| absorption coefficient μ (mm <sup>-1</sup> )           | 1.889                                                           |
| diffractometer                                         | STOE IPDS 2T                                                    |
| radiation (λ [Å])                                      | graphite-monochromated Mo-K <sub>α</sub> (0.71073)              |
| temperature (°C)                                       | -173.15                                                         |
| scan type                                              | ω scan (increment 1.5°, exposure 1 min)                         |
| completeness of dataset                                | 0.995%                                                          |
| θ range of data collection (deg)                       | 1.935 to 25.203                                                 |
| reflections collected                                  | 33493                                                           |
| independent reflections                                | 33493                                                           |
| independent reflections with <i>I</i> > 2σ( <i>I</i> ) | 32468                                                           |
| structure solution method                              | dual-space structure solution (SHELXT)                          |
| refinement method                                      | full-matrix least-squares on F <sup>2</sup> (SHELXL 2016/4)     |
| absorption correction method                           | numerical                                                       |
| range of transmission factors                          | 0.7567 and 0.6186                                               |
| data / parameters / restraints                         | 33493 / 963 / 2284                                              |
| goodness of fit (GooF) [all data]                      | 0.849                                                           |
| final R values                                         |                                                                 |
| R1 [all data, <i>I</i> ≥ 2σ ( <i>I</i> )]              | 0.0496, 0.0476                                                  |
| wR2 [all data, <i>I</i> ≥ 2σ ( <i>I</i> )]             | 0.1331, 0.1299                                                  |
| largest difference peak and hole                       | 2.672 and -1.141 eÅ <sup>-3</sup>                               |

## Refinement special details:

Data showed signs of non-merohedral twinning and have been treated accordingly. Additionally, the data are of relatively low quality. Hence, the C-C distance standard uncertainty is relatively high.

## STRUCTURE REPORT for 4Tb

**Crystallographer:** F. Engelhardt

**ID code:** fe0044

**Date:** 21.8.2018

**Sample by:** Volker Lorenz

**Compound:** Tb<sub>2</sub>(COT'')<sub>3</sub> (**4Tb**)

Tb<sub>2</sub>{μ-η<sup>8</sup>:η<sup>8</sup>-C<sub>8</sub>H<sub>6</sub>-1,5-(SiMe<sub>3</sub>)<sub>2</sub>}{η<sup>8</sup>-C<sub>8</sub>H<sub>6</sub>-1,4-(SiMe<sub>3</sub>)<sub>2</sub>}}<sub>2</sub>

**Formula sum:** C<sub>42</sub>H<sub>72</sub>Si<sub>6</sub>Tb<sub>2</sub>

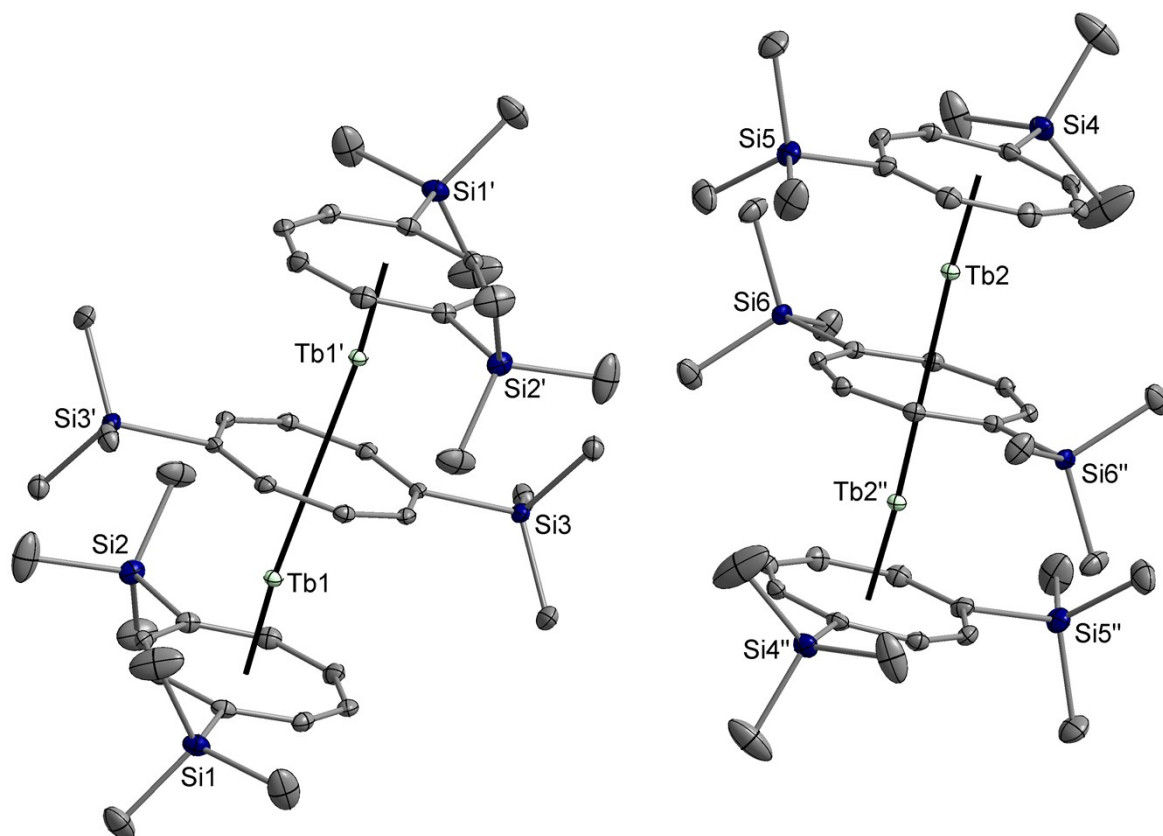

**Figure S10.** Molecular structure of **4Tb** in the crystalline state. Displacement ellipsoids of the heavier atoms with 50% probability, H atoms omitted for clarity.

**Table S5.** Crystallographic Data and Details on Structure Refinement of **4Tb**

|                                                                   |                                                                    |
|-------------------------------------------------------------------|--------------------------------------------------------------------|
| formula sum                                                       | C <sub>42</sub> H <sub>72</sub> Si <sub>6</sub> Tb <sub>2</sub>    |
| formula weight                                                    | 1063.37                                                            |
| crystal size (mm)                                                 | 0.2 x 0.2 x 0.2 mm                                                 |
| crystal system                                                    | Monoclinic                                                         |
| space group                                                       | P2 <sub>1</sub> /n                                                 |
| unit cell parameters                                              |                                                                    |
| <i>a</i> (Å)                                                      | 20.141(4)                                                          |
| <i>b</i> (Å)                                                      | 12.664(3)                                                          |
| <i>c</i> (Å)                                                      | 20.822(4)                                                          |
| α (deg)                                                           | 90                                                                 |
| β (deg)                                                           | 116.070(13)                                                        |
| γ (deg)                                                           | 90                                                                 |
| unit cell volume <i>V</i> (Å <sup>3</sup> )                       | 4770.6(17)                                                         |
| molecules per cell <i>z</i>                                       | 4                                                                  |
| crystallographic density ρ <sub>calcd</sub> (g cm <sup>-3</sup> ) | 1.481                                                              |
| absorption coefficient μ (mm <sup>-1</sup> )                      | 3.118                                                              |
| diffractometer                                                    | STOE IPDS 2T                                                       |
| radiation (λ[Å])                                                  | graphite-monochromated Mo-K <sub>α</sub> (0.71073)                 |
| temperature (°C)                                                  | -173.15                                                            |
| scan type                                                         | ω scan (increment 1.5°, exposure 15 min)                           |
| completeness of dataset                                           | 99.7 %                                                             |
| θ range of data collection (deg)                                  | 1.942 to 29.279                                                    |
| reflections collected                                             | 48052                                                              |
| independent reflections                                           | 12657                                                              |
| structure solution method                                         | dual-space structure solution (SHELXT)                             |
| refinement method                                                 | full-matrix least-squares on <i>F</i> <sup>2</sup> (SHELXL 2016/4) |
| absorption correction method                                      | empirical                                                          |
| range of transmission factors                                     | 1.407 and 0.766                                                    |
| data / parameters / restraints                                    | 12657 / 876 / 470                                                  |
| goodness of fit (GooF) [all data]                                 | 1.037                                                              |
| final <i>R</i> values                                             |                                                                    |
| <i>R</i> <sub>1</sub> [all data, <i>I</i> ≥ 2σ ( <i>I</i> )]      | 0.0388, 0.0286                                                     |
| <i>wR</i> <sub>2</sub> [all data, <i>I</i> ≥ 2σ ( <i>I</i> )]     | 0.0633, 0.0609                                                     |
| largest difference peak and hole                                  | 1.096 and -1.238 eÅ <sup>-3</sup>                                  |

Refinement special details: Large positive and negative residual density peaks due to inefficient absorption correction

## STRUCTURE REPORT

**Crystallographer:** F. Engelhardt

**ID code:** fe0074

**Date:** 21.8.2018

**Sample by:** Volker Lorenz

**Compound:**  $\text{Tm}_2(\text{COT}''')_3$  (**4Tm**)

$\text{Tm}_2\{\mu\text{-}\eta^8\text{:}\eta^8\text{-C}_8\text{H}_6\text{-1,5-(SiMe}_3)_2\}\{\eta^8\text{-C}_8\text{H}_6\text{-1,4-(SiMe}_3)_2\}_2$

**Formula sum:**  $\text{C}_{42}\text{H}_{72}\text{Si}_6\text{Tm}_2$

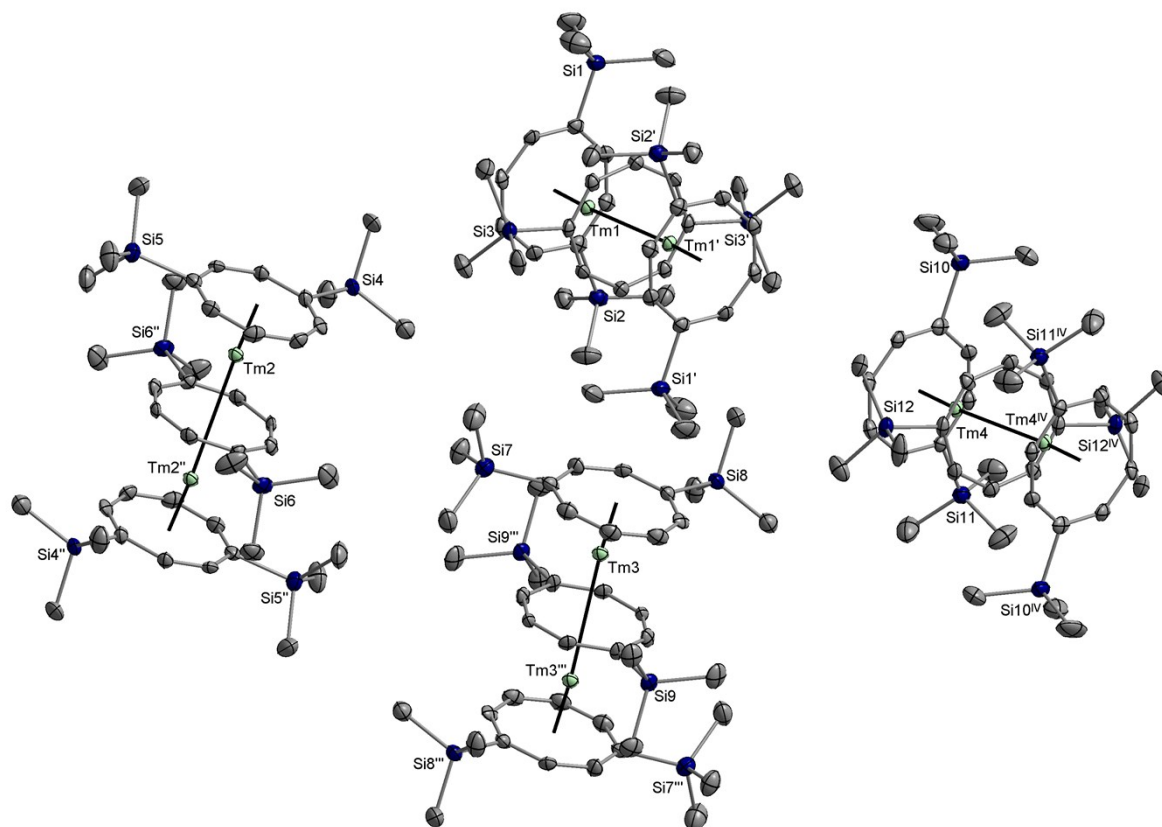

**Figure S11.** Molecular structure of **4Tm** in the crystalline state. Displacement ellipsoids of the heavier atoms with 50% probability, H atoms and disorder of  $\text{SiMe}_3$  moieties omitted for clarity.

**Table S6.** Crystallographic Data and Details on Structure Refinement of **4Tm**

|                                                                   |                                                                    |
|-------------------------------------------------------------------|--------------------------------------------------------------------|
| formula sum                                                       | C <sub>42</sub> H <sub>72</sub> Si <sub>6</sub> Tm <sub>2</sub>    |
| formula weight                                                    | 1083.39                                                            |
| crystal size (mm)                                                 | 0.16 x 0.10 x 0.07 mm                                              |
| crystal system                                                    | Triclinic                                                          |
| space group                                                       | <i>P</i> 1                                                         |
| unit cell parameters                                              |                                                                    |
| <i>a</i> (Å)                                                      | 13.092(3)                                                          |
| <i>b</i> (Å)                                                      | 18.108(6)                                                          |
| <i>c</i> (Å)                                                      | 20.921(5)                                                          |
| α (deg)                                                           | 73.62(2)                                                           |
| β (deg)                                                           | 86.14(2)                                                           |
| γ (deg)                                                           | 89.80(2)                                                           |
| unit cell volume <i>V</i> (Å <sup>3</sup> )                       | 4747(2)                                                            |
| molecules per cell <i>z</i>                                       | 4                                                                  |
| crystallographic density ρ <sub>calcd</sub> (g cm <sup>-3</sup> ) | 1.516                                                              |
| absorption coefficient μ (mm <sup>-1</sup> )                      | 3.892                                                              |
| diffractometer                                                    | STOE IPDS 2T                                                       |
| radiation (λ[Å])                                                  | graphite-monochromated Mo-K <sub>α</sub> (0.71073)                 |
| temperature (°C)                                                  | -173.15                                                            |
| scan type                                                         | ω scan (increment 1.5°, exposure 1 min)                            |
| completeness of dataset                                           | 99.5%                                                              |
| θ range of data collection (deg)                                  | 1.920 to 26.371                                                    |
| reflections collected                                             | 39793                                                              |
| independent reflections                                           | 19326                                                              |
| independent reflections with <i>I</i> > 2σ( <i>I</i> )            | 15761                                                              |
| structure solution method                                         | dual-space structure solution (SHELXT)                             |
| refinement method                                                 | full-matrix least-squares on <i>F</i> <sup>2</sup> (SHELXL 2016/4) |
| absorption correction method                                      | Numerical                                                          |
| range of transmission factors                                     | 0.5492 and 0.4573                                                  |
| data / parameters / restraints                                    | 19326 / 937 / 0                                                    |
| goodness of fit (GooF) [all data]                                 | 1.158                                                              |
| final <i>R</i> values                                             |                                                                    |
| <i>R</i> <sub>1</sub> [all data, <i>I</i> ≥ 2σ ( <i>I</i> )]      | 0.0725, 0.0572                                                     |
| <i>wR</i> <sub>2</sub> [all data, <i>I</i> ≥ 2σ ( <i>I</i> )]     | 0.1514, 0.1429                                                     |
| largest difference peak and hole                                  | 5.079 and -2.082 eÅ <sup>-3</sup>                                  |

## Refinement special details:

The large residual density peaks are related to a very low-occupied disorder (~2.3 %). Due to the large number of electrons in thulium, the disorder is not resolvable for the organic components.



## STRUCTURE REPORT

**Crystallographer:** P. Liebing  
**ID code:** li0238  
**Date:** 10.02.16  
**Sample by:** Volker Lorenz  
**Compound:**  $\text{Lu}_2(\text{COT}^{\text{II}})_3$  (**4Lu**)  
 $\text{Lu}_2\{\mu\text{-}\eta^4\text{:}\eta^4\text{-C}_8\text{H}_6\text{-1,4-(SiMe}_3)_2\}\{\eta^8\text{-C}_8\text{H}_6\text{-1,4-(SiMe}_3)_2\}_2$   
**Formula sum:**  $\text{C}_{42}\text{H}_{72}\text{Lu}_2\text{Si}_6$

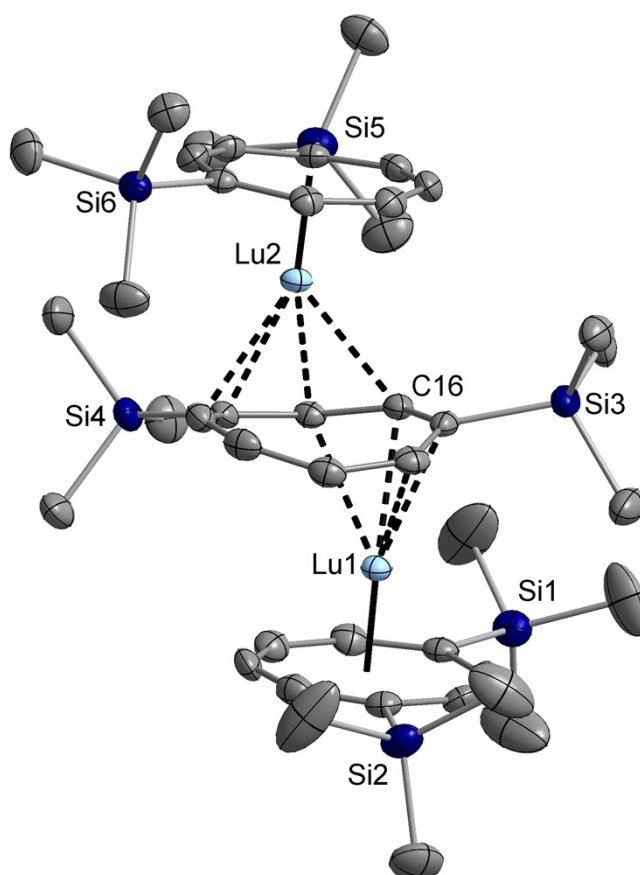

**Figure S12.** Molecular structure of **4Lu** in the crystalline state. Displacement ellipsoids drawn at the 50% probability level, H atoms omitted for clarity.

**Table S7. Crystallographic Data and Details on Structure Refinement**

|                                                                   |                                                                   |
|-------------------------------------------------------------------|-------------------------------------------------------------------|
| formula sum                                                       | C <sub>42</sub> H <sub>72</sub> Lu <sub>2</sub> Si <sub>6</sub>   |
| formula weight                                                    | 1095.47                                                           |
| crystal color / shape / size (mm)                                 | colorless prisms / 0.41 × 0.25 × 0.16                             |
| crystal system                                                    | monoclinic                                                        |
| space group                                                       | <i>P</i> 2 <sub>1</sub> / <i>c</i>                                |
| unit cell parameters                                              |                                                                   |
| <i>a</i> (Å)                                                      | 9.8651(3)                                                         |
| <i>b</i> (Å)                                                      | 39.2173(9)                                                        |
| <i>c</i> (Å)                                                      | 12.3474(4)                                                        |
| α (deg)                                                           | 90                                                                |
| β (deg)                                                           | 92.598(3)                                                         |
| γ (deg)                                                           | 90                                                                |
| unit cell volume <i>V</i> (Å <sup>3</sup> )                       | 4772.1(2)                                                         |
| molecules per cell <i>z</i>                                       | 4                                                                 |
| crystallographic density ρ <sub>calcd</sub> (g cm <sup>-3</sup> ) | 1.525                                                             |
| absorption coefficient μ (mm <sup>-1</sup> )                      | 4.291                                                             |
| diffractometer                                                    | STOE IPDS 2T                                                      |
| radiation (λ[Å])                                                  | graphite-monochromated Mo-K <sub>α</sub> (0.71073)                |
| temperature (°C)                                                  | -120                                                              |
| scan type                                                         | ω scan (increment 1.5°, exposure 1 min)                           |
| completeness of dataset                                           | 99.4%                                                             |
| θ range of data collection (deg)                                  | 2.067 ... 25.084                                                  |
| reflections collected                                             | 24021 (-11 ≤ <i>h</i> ≤ 11, -46 ≤ <i>k</i> ≤ 41, -14 ≤ <i>l</i> ≤ |
| 14)                                                               |                                                                   |
| independent reflections                                           | 8445 ( <i>R</i> <sub>int</sub> = 0.0423)                          |
| independent reflections with <i>I</i> > 2σ( <i>I</i> )            | 7340                                                              |
| structure solution method                                         | heavy atom methods (SIR-97)                                       |
| refinement method                                                 | full-matrix least-squares on <i>F</i> <sup>2</sup> (SHELXL        |
| 2016/4)                                                           |                                                                   |
| absorption correction method                                      | numerical                                                         |
| range of transmission factors                                     | 0.2449 – 0.5579                                                   |
| data / parameters / restraints                                    | 8445 / 470 / 0                                                    |
| goodness of fit (GooF) [all data]                                 | 1.080                                                             |
| final <i>R</i> values <sup>a</sup>                                |                                                                   |
| <i>R</i> <sub>1</sub> [all data, <i>I</i> ≥ 2σ ( <i>I</i> )]      | 0.0397, 0.0322                                                    |
| <i>wR</i> <sub>2</sub> [all data, <i>I</i> ≥ 2σ ( <i>I</i> )]     | 0.0661, 0.0643                                                    |
| largest difference peak and hole                                  | 0.913 and -1.059 e Å <sup>-3</sup>                                |
| Extinction coefficient                                            | 0.00082(5)                                                        |
| Flack parameter                                                   | –                                                                 |

Refinement special details: Six reflections are strongly disagreeing with the structural model and were therefore omitted for refinement.

## 5. Details on the Analysis of Close Interactions in **4Y-1,5** and **4Y-1,4**

The Hirshfeld surfaces and condensed 2-dimensional fingerprint plots have been calculated with Crystal Explorer by Spackman et al.<sup>[S4]</sup> The crystallographic information files (CIFs) used as input have been modified to only contain the major part if disorder was present.

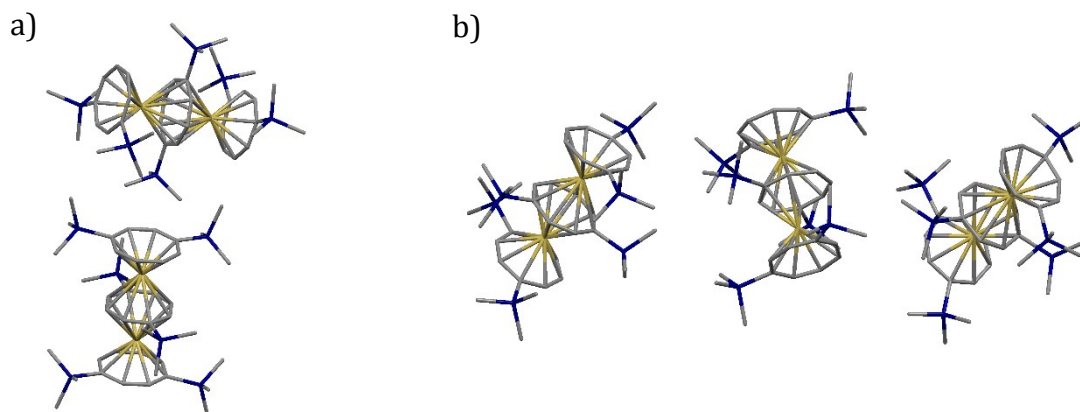

**Figure S13.** Asymmetric units of **4Y-1,5** (a) and **4Y-1,4** (b). Disorder of the methyl groups and hydrogen atoms have been omitted for clarity.

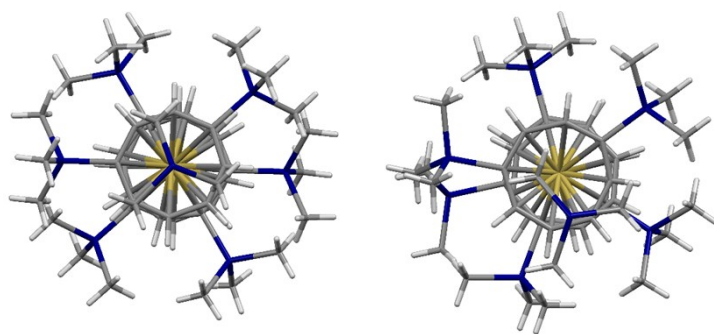

**Figure S14.** View along the Y-Y axis of the structures **4Y-1,5** (left) and **4Y-1,4** (right). Also shown is the SiMe<sub>3</sub> group facing the top-deck COT<sup>''</sup> ring.

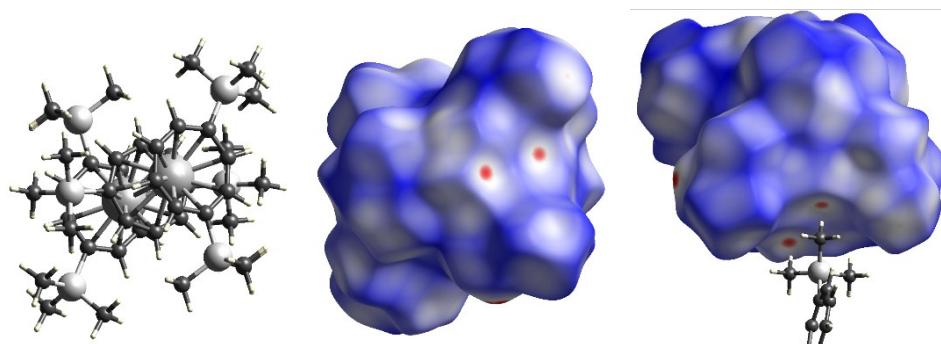

**Figure S15.** Orientation of a triple decker of **4Y-1,5** (left), corresponding Hirshfeld surface with  $d_{\text{norm}}$  mapped on it (middle) and neighboring  $\text{SiMe}_3$  group matching the C-H regions of high hydrogen interactions donor and acceptor capability marked in red (right)

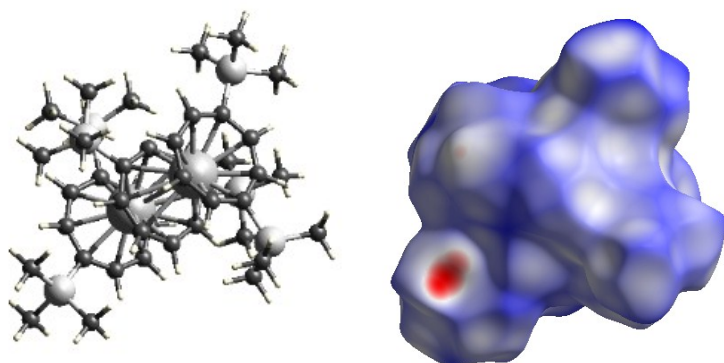

**Figure S16.** Orientation of a triple decker of **4Y-1,4**(left) and corresponding Hirshfeld surface with  $d_{\text{norm}}$  mapped on it. Red regions indicate hydrogen interactions donor and acceptor capability

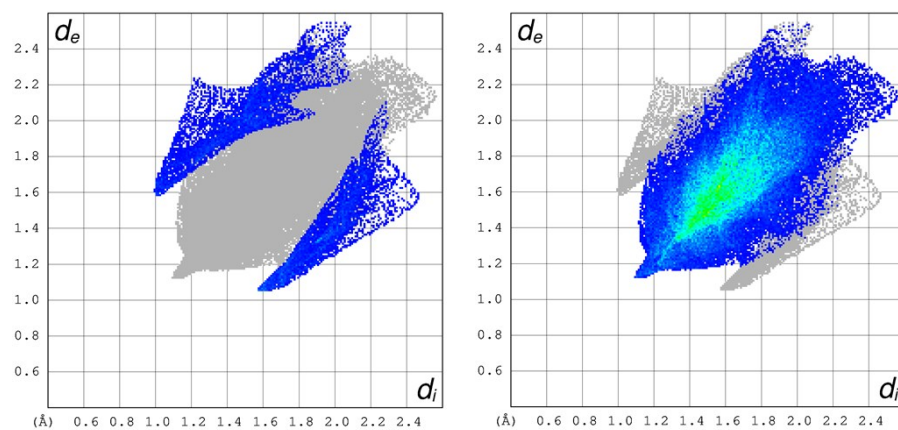

**Figure S17.** Fingerprint plots for **4Y-1,5**. Left: Interactions from C to H or Vice versa are highlighted; right: Interactions from H to H are highlighted.

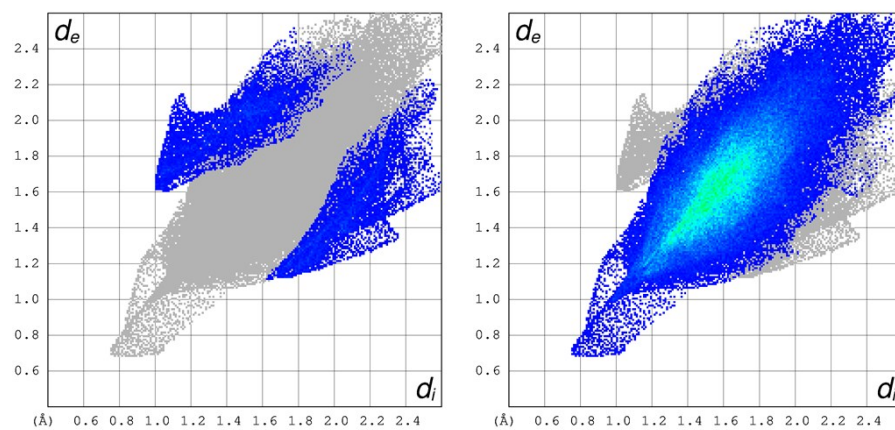

**Figure S18.** Fingerprint plots for **4Y-1,4**. Left: Interactions from C to H or *vice versa* are highlighted; right: Interactions from H to H are highlighted.

## 6. Computational details

### Computational details

Calculations were carried out at the DFT level using the hybrid functional B3PW91<sup>[S5]</sup> with the Gaussian 09<sup>[S6]</sup> suite of programs. The rare earth center was treated with a small-core relativistic pseudopotential (RECP) ([Ar] + 3d)<sup>[S7]</sup> in combination with its adapted basis set (segmented basis set that includes up to g functions). Silicon atoms have been treated with the small core Stuttgart-Dresden effective core potential associated with its adapted basis set and additional *d* polarization functions.<sup>[S8]</sup> Polarized all-electron triple- $\zeta$  6-311G(d,p)<sup>[S9]</sup> basis sets were used for C, H. Geometry optimization was carried out without any symmetry restriction. The nature of the extrema (minimum) was verified with analytical frequency calculations. The NBO analysis<sup>[S10]</sup> was finally carried out on the optimized geometry.

**Sc<sub>2</sub>(1,4-COT)3:**

|    |           |           |           |
|----|-----------|-----------|-----------|
| Si | 5.929265  | 7.312739  | 25.091833 |
| C  | 7.294516  | 6.298804  | 25.930301 |
| C  | 6.713881  | 8.891867  | 24.385651 |
| C  | 5.205617  | 6.309337  | 23.652634 |
| C  | 4.494204  | 7.685035  | 26.296534 |
| C  | 4.554527  | 7.002997  | 27.536921 |
| C  | 3.728044  | 6.901586  | 28.677077 |
| C  | 2.482855  | 7.437615  | 29.066289 |
| C  | 1.559578  | 8.346411  | 28.509470 |
| C  | 1.466201  | 9.100498  | 27.310638 |
| Si | -0.138779 | 10.130265 | 27.215391 |
| C  | -0.116296 | 11.325124 | 25.742572 |
| Sc | 3.760795  | 9.197060  | 28.058444 |
| C  | 4.790241  | 11.301076 | 28.399851 |
| C  | 5.897485  | 10.489587 | 28.031786 |
| C  | 6.756341  | 9.643389  | 28.752394 |
| C  | 6.902961  | 9.268592  | 30.097326 |
| C  | 6.055888  | 9.157493  | 31.212330 |
| C  | 4.664859  | 9.381998  | 31.409272 |
| Si | 3.899090  | 8.326707  | 32.808680 |
| C  | 4.788537  | 8.584349  | 34.465504 |
| C  | 3.540510  | 8.589618  | 25.761248 |
| C  | 2.317482  | 9.172471  | 26.175357 |
| C  | 3.943326  | 11.156145 | 29.546422 |
| C  | 3.800256  | 10.223371 | 30.634721 |
| Sc | 5.510911  | 11.547667 | 31.803227 |
| C  | 7.716714  | 12.476432 | 31.836871 |
| C  | 6.929097  | 13.267809 | 30.973510 |
| C  | 5.627697  | 13.810092 | 31.024907 |
| C  | 4.541778  | 13.745515 | 31.922977 |
| C  | 4.279834  | 13.116839 | 33.167108 |

|    |           |           |           |
|----|-----------|-----------|-----------|
| C  | 5.100838  | 12.317559 | 34.006437 |
| C  | 6.433481  | 11.835503 | 33.992881 |
| C  | 7.546728  | 11.886793 | 33.116128 |
| Si | 9.140728  | 11.037924 | 33.745341 |
| C  | 10.456200 | 12.391134 | 33.940390 |
| Si | 2.530576  | 13.502314 | 33.828560 |
| C  | 2.119829  | 12.480186 | 35.372218 |
| C  | 1.205575  | 13.176240 | 32.508103 |
| C  | 2.486328  | 15.341321 | 34.292949 |
| C  | -1.584883 | 8.922319  | 26.997277 |
| C  | -0.419431 | 11.130198 | 28.805238 |
| Si | 4.534679  | 12.797519 | 27.233119 |
| C  | 6.096846  | 13.880073 | 27.224911 |
| C  | 4.283717  | 12.265330 | 25.429497 |
| C  | 3.049841  | 13.844282 | 27.776574 |
| C  | 4.077514  | 6.474812  | 32.419806 |
| C  | 2.061672  | 8.735566  | 33.041505 |
| C  | 9.787512  | 9.731034  | 32.531375 |
| C  | 8.868610  | 10.208116 | 35.428654 |
| H  | 2.000111  | 9.930637  | 25.465281 |
| H  | 3.872440  | 9.043539  | 24.828922 |
| H  | 5.504217  | 6.504375  | 27.704669 |
| H  | 4.212979  | 6.361418  | 29.484587 |
| H  | 2.239505  | 7.194129  | 30.096166 |
| H  | 0.783724  | 8.596157  | 29.231019 |
| H  | -1.358644 | 11.690163 | 28.734749 |
| H  | 0.387898  | 11.849470 | 28.973646 |
| H  | -0.488233 | 10.489691 | 29.689993 |
| H  | -1.044077 | 11.908014 | 25.740923 |
| H  | -0.063303 | 10.795694 | 24.785877 |
| H  | 0.717149  | 12.033147 | 25.788741 |
| H  | -2.541672 | 9.453716  | 26.950503 |



|   |           |           |           |
|---|-----------|-----------|-----------|
| H | -1.632891 | 8.212061  | 27.828969 |
| H | -1.470766 | 8.344481  | 26.074521 |
| H | 7.221771  | 9.468809  | 25.165064 |
| H | 5.978622  | 9.543362  | 23.903182 |
| H | 7.460384  | 8.626484  | 23.628469 |
| H | 7.715778  | 6.818536  | 26.796800 |
| H | 8.107577  | 6.130688  | 25.215444 |
| H | 6.938442  | 5.317260  | 26.258420 |
| H | 5.975688  | 6.056527  | 22.915612 |
| H | 4.418628  | 6.871610  | 23.139588 |
| H | 4.762827  | 5.376619  | 24.016532 |
| H | 3.093304  | 11.835715 | 29.524620 |
| H | 2.801784  | 10.301352 | 31.060414 |
| H | 6.545494  | 8.669025  | 32.055437 |
| H | 7.893951  | 8.865430  | 30.299353 |
| H | 7.577738  | 9.279073  | 28.135909 |
| H | 6.227548  | 10.639898 | 27.004069 |
| H | 3.172527  | 14.232344 | 28.792764 |
| H | 2.112701  | 13.280021 | 27.739802 |
| H | 2.943184  | 14.703624 | 27.105556 |
| H | 6.272352  | 14.382680 | 28.179522 |
| H | 6.011067  | 14.653615 | 26.453401 |
| H | 6.981789  | 13.277622 | 26.995852 |
| H | 4.261512  | 13.153586 | 24.787951 |
| H | 3.346365  | 11.721440 | 25.292349 |
| H | 5.101037  | 11.626645 | 25.081070 |
| H | 1.650091  | 8.116708  | 33.846306 |
| H | 1.475862  | 8.534295  | 32.138943 |
| H | 1.908586  | 9.782920  | 33.319785 |
| H | 4.396147  | 7.874853  | 35.202894 |
| H | 4.636691  | 9.595543  | 34.849865 |
| H | 5.865707  | 8.410599  | 34.382059 |

|   |           |           |           |
|---|-----------|-----------|-----------|
| H | 3.803495  | 5.884463  | 33.301406 |
| H | 5.111749  | 6.226377  | 32.160657 |
| H | 3.436070  | 6.153167  | 31.595231 |
| H | 4.554936  | 11.902300 | 34.849328 |
| H | 6.598110  | 11.167910 | 34.833885 |
| H | 8.649613  | 12.191833 | 31.353491 |
| H | 7.399659  | 13.415234 | 30.005493 |
| H | 5.349802  | 14.287992 | 30.090844 |
| H | 3.658192  | 14.210319 | 31.488544 |
| H | 1.499576  | 15.631084 | 34.670442 |
| H | 2.715471  | 15.972065 | 33.428093 |
| H | 3.226012  | 15.562073 | 35.069241 |
| H | 1.105877  | 12.729175 | 35.704428 |
| H | 2.798673  | 12.702365 | 36.201775 |
| H | 2.148945  | 11.402243 | 35.184954 |
| H | 0.214484  | 13.439262 | 32.894093 |
| H | 1.183837  | 12.121238 | 32.218249 |
| H | 1.371674  | 13.770057 | 31.603866 |
| H | 8.556187  | 10.925798 | 36.193826 |
| H | 9.811428  | 9.760675  | 35.762464 |
| H | 8.123188  | 9.407507  | 35.385237 |
| H | 10.124272 | 13.154467 | 34.651396 |
| H | 10.654436 | 12.890472 | 32.986737 |
| H | 11.401045 | 11.973470 | 34.304875 |
| H | 10.771381 | 9.372428  | 32.853930 |
| H | 9.893480  | 10.127017 | 31.516906 |
| H | 9.113215  | 8.870136  | 32.489158 |

**Sc<sub>2</sub>(1,5-COT)(1,4-COT)<sub>2</sub>:**

|    |          |          |           |
|----|----------|----------|-----------|
| C  | 7.073005 | 6.332443 | 26.905068 |
| Si | 5.724030 | 6.934224 | 25.715202 |
| C  | 4.211043 | 7.615787 | 26.662179 |

|    |           |           |           |
|----|-----------|-----------|-----------|
| C  | 3.423148  | 8.536961  | 25.924590 |
| C  | 2.239679  | 9.286482  | 26.137264 |
| Sc | 3.485505  | 9.371984  | 28.156672 |
| C  | 5.955897  | 10.517537 | 28.020126 |
| C  | 6.816577  | 9.897146  | 28.941604 |
| C  | 6.779769  | 9.476355  | 30.283410 |
| C  | 5.729180  | 9.148742  | 31.188715 |
| Sc | 5.724954  | 11.467118 | 31.767441 |
| C  | 6.872902  | 11.751746 | 33.849487 |
| C  | 7.839159  | 12.089803 | 32.866873 |
| Si | 9.657040  | 11.665536 | 33.279640 |
| C  | 9.804913  | 10.725298 | 34.921394 |
| C  | 6.487646  | 8.225576  | 24.551881 |
| C  | 5.121002  | 5.469119  | 24.669240 |
| C  | 4.047720  | 7.067249  | 27.961439 |
| C  | 3.089097  | 7.165220  | 28.993579 |
| C  | 1.897613  | 7.889214  | 29.197694 |
| C  | 1.168236  | 8.841918  | 28.457759 |
| C  | 1.285605  | 9.447713  | 27.178117 |
| Si | -0.179356 | 10.613738 | 26.800485 |
| C  | -0.442201 | 11.873803 | 28.197033 |
| C  | 0.064372  | 11.532055 | 25.158936 |
| C  | -1.737530 | 9.540070  | 26.658653 |
| C  | 4.813253  | 11.361290 | 28.143915 |
| Si | 4.714686  | 12.728440 | 26.816158 |
| C  | 3.137461  | 13.763386 | 27.008410 |
| C  | 3.938914  | 11.447479 | 29.255102 |
| C  | 3.704069  | 10.617960 | 30.398036 |
| C  | 4.381677  | 9.582238  | 31.118054 |
| C  | 7.732320  | 12.770862 | 31.626203 |
| C  | 6.717613  | 13.459507 | 30.929386 |
| C  | 5.367236  | 13.767571 | 31.189873 |

|    |           |           |           |
|----|-----------|-----------|-----------|
| C  | 4.439628  | 13.458777 | 32.208712 |
| C  | 4.446937  | 12.690596 | 33.399673 |
| Si | 2.782697  | 12.581192 | 34.332061 |
| C  | 3.013911  | 13.389075 | 36.032877 |
| C  | 5.486868  | 11.971775 | 34.052247 |
| C  | 10.566018 | 13.319927 | 33.477248 |
| C  | 10.504750 | 10.680489 | 31.895893 |
| C  | 2.237903  | 10.778952 | 34.571864 |
| C  | 1.407908  | 13.500512 | 33.403871 |
| C  | 6.204313  | 13.889748 | 27.020749 |
| C  | 4.785302  | 12.024027 | 25.057136 |
| H  | 2.083892  | 9.986967  | 25.321103 |
| H  | 3.900067  | 8.845085  | 24.997431 |
| H  | 4.906258  | 6.489505  | 28.291769 |
| H  | 3.411595  | 6.651495  | 29.893072 |
| H  | 1.527906  | 7.789208  | 30.215270 |
| H  | 0.368165  | 9.268636  | 29.060486 |
| H  | -1.304540 | 12.511440 | 27.972403 |
| H  | 0.430392  | 12.521608 | 28.323171 |
| H  | -0.639839 | 11.384264 | 29.155978 |
| H  | -0.790293 | 12.196460 | 24.990074 |
| H  | 0.110068  | 10.837506 | 24.313832 |
| H  | 0.968504  | 12.147871 | 25.143609 |
| H  | -2.622156 | 10.152389 | 26.452107 |
| H  | -1.920498 | 8.983835  | 27.583611 |
| H  | -1.631768 | 8.811114  | 25.848847 |
| H  | 6.885435  | 9.081287  | 25.105741 |
| H  | 5.776277  | 8.599206  | 23.809098 |
| H  | 7.318160  | 7.767705  | 24.002705 |
| H  | 7.347459  | 7.111544  | 27.623100 |
| H  | 7.968453  | 6.066837  | 26.332303 |
| H  | 6.768807  | 5.440785  | 27.462154 |

|   |          |           |           |
|---|----------|-----------|-----------|
| H | 5.942657 | 5.020653  | 24.099975 |
| H | 4.351065 | 5.788150  | 23.959167 |
| H | 4.684478 | 4.692163  | 25.305178 |
| H | 3.182042 | 12.224564 | 29.176809 |
| H | 2.742443 | 10.845899 | 30.854004 |
| H | 7.756999 | 9.138953  | 30.622570 |
| H | 7.786345 | 9.682146  | 28.489965 |
| H | 6.389303 | 10.535514 | 27.020398 |
| H | 3.104491 | 14.288898 | 27.968599 |
| H | 2.233569 | 13.154371 | 26.921623 |
| H | 3.103015 | 14.523723 | 26.220407 |
| H | 6.132319 | 14.468411 | 27.947000 |
| H | 6.256422 | 14.600339 | 26.188362 |
| H | 7.142978 | 13.327405 | 27.044303 |
| H | 4.831703 | 12.844958 | 24.332779 |
| H | 3.900752 | 11.421729 | 24.834466 |
| H | 5.667880 | 11.396613 | 24.901367 |
| H | 5.129326 | 11.385281 | 34.897678 |
| H | 7.266231 | 11.073672 | 34.603134 |
| H | 8.634127 | 12.698480 | 31.021168 |
| H | 7.023914 | 13.743464 | 29.927250 |
| H | 4.889672 | 14.247226 | 30.339809 |
| H | 3.444851 | 13.796266 | 31.932128 |
| H | 2.089800 | 13.346421 | 36.619582 |
| H | 3.299703 | 14.440224 | 35.924043 |
| H | 3.800264 | 12.889863 | 36.607859 |
| H | 1.308869 | 10.736261 | 35.151190 |
| H | 2.988656 | 10.188465 | 35.105146 |
| H | 2.054555 | 10.297242 | 33.605739 |
| H | 0.481072 | 13.436953 | 33.984711 |
| H | 1.207340 | 13.067915 | 32.418225 |
| H | 1.640567 | 14.561916 | 33.272191 |

|    |           |           |           |
|----|-----------|-----------|-----------|
| H  | 9.403914  | 11.314272 | 35.752635 |
| H  | 10.864935 | 10.542566 | 35.130352 |
| H  | 9.301609  | 9.754068  | 34.916302 |
| H  | 10.118740 | 13.912471 | 34.281777 |
| H  | 10.512712 | 13.913496 | 32.559168 |
| H  | 11.623140 | 13.161982 | 33.717639 |
| H  | 11.577072 | 10.593163 | 32.103762 |
| H  | 10.396799 | 11.170472 | 30.923118 |
| H  | 10.094468 | 9.670467  | 31.811481 |
| H  | 3.727884  | 9.144193  | 31.870096 |
| Si | 6.115844  | 7.763994  | 32.445520 |
| C  | 5.146187  | 7.984281  | 34.060837 |
| C  | 5.649444  | 6.074668  | 31.710134 |
| C  | 7.965427  | 7.710068  | 32.846971 |
| H  | 5.359384  | 7.148267  | 34.736188 |
| H  | 5.430815  | 8.911491  | 34.566985 |
| H  | 4.064372  | 8.004598  | 33.896909 |
| H  | 8.143730  | 6.978528  | 33.642833 |
| H  | 8.565822  | 7.407105  | 31.983635 |
| H  | 8.325566  | 8.681596  | 33.193939 |
| H  | 6.016752  | 5.267811  | 32.354403 |
| H  | 4.565276  | 5.956091  | 31.620905 |
| H  | 6.092501  | 5.941589  | 30.718307 |

**Y<sub>2</sub>(1,4-COT)<sub>3</sub>:**

|    |          |           |           |
|----|----------|-----------|-----------|
| C  | 8.797991 | 12.516967 | 12.526997 |
| Si | 7.333471 | 13.415286 | 11.722640 |
| C  | 7.560157 | 13.357512 | 9.839188  |
| C  | 5.672561 | 12.577186 | 12.139654 |
| C  | 5.755144 | 11.349033 | 12.852144 |
| C  | 4.850893 | 10.366756 | 13.330543 |
| C  | 3.445460 | 10.143644 | 13.294211 |

|    |           |           |           |
|----|-----------|-----------|-----------|
| Si | 2.915363  | 8.503858  | 14.110920 |
| C  | 3.252102  | 7.095663  | 12.884097 |
| Y  | 3.819329  | 12.583587 | 13.952996 |
| C  | 2.272905  | 12.082439 | 11.958611 |
| C  | 3.170268  | 13.072128 | 11.499223 |
| C  | 4.564518  | 13.280974 | 11.589033 |
| C  | 4.060732  | 12.262772 | 16.580438 |
| C  | 2.668714  | 12.195460 | 16.381969 |
| C  | 1.685085  | 12.982913 | 15.725567 |
| C  | 1.655399  | 14.178977 | 14.955070 |
| C  | 2.591398  | 15.222405 | 14.693939 |
| C  | 3.938954  | 15.360414 | 15.159227 |
| Y  | 2.164688  | 15.278893 | 17.256516 |
| C  | 0.579414  | 17.016008 | 18.119976 |
| C  | 1.881125  | 17.547652 | 18.321020 |
| C  | 3.133943  | 17.082530 | 18.814224 |
| C  | 3.536102  | 15.819748 | 19.326932 |
| C  | 2.906483  | 14.576104 | 19.575924 |
| C  | 1.600875  | 14.057397 | 19.416010 |
| C  | 0.378362  | 14.548220 | 18.903544 |
| C  | -0.080089 | 15.772745 | 18.340633 |
| Si | -1.925655 | 15.704342 | 17.855421 |
| C  | -2.944845 | 15.517582 | 19.444241 |
| C  | 5.048410  | 13.251196 | 16.343413 |
| C  | 4.923470  | 14.556482 | 15.802847 |
| C  | 7.347881  | 15.231938 | 12.279142 |
| C  | -2.469484 | 17.283027 | 16.954954 |
| C  | -2.279785 | 14.219339 | 16.723540 |
| Si | 1.987450  | 16.632271 | 13.541032 |
| C  | 1.597244  | 18.214042 | 14.515109 |
| C  | 3.335114  | 17.058586 | 12.278803 |
| C  | 0.420371  | 16.096212 | 12.618554 |

|    |           |           |           |
|----|-----------|-----------|-----------|
| Si | 4.476992  | 18.439825 | 18.832039 |
| C  | 4.042428  | 19.676667 | 20.203586 |
| C  | 4.560107  | 19.373789 | 17.179637 |
| C  | 6.194324  | 17.712165 | 19.176379 |
| C  | 2.385942  | 10.886284 | 12.704275 |
| C  | 3.889808  | 8.157019  | 15.704907 |
| C  | 1.065807  | 8.511326  | 14.543962 |
| H  | 6.762126  | 11.138986 | 13.202978 |
| H  | 5.375581  | 9.643574  | 13.951351 |
| H  | 1.403655  | 10.485554 | 12.940156 |
| H  | 4.841657  | 14.244735 | 11.164341 |
| H  | 1.235254  | 12.354626 | 11.779149 |
| H  | 2.654248  | 13.914626 | 11.044422 |
| H  | 4.313939  | 7.058076  | 12.619639 |
| H  | 2.685271  | 7.246160  | 11.959593 |
| H  | 2.970926  | 6.123171  | 13.302831 |
| H  | 3.730432  | 8.944394  | 16.448183 |
| H  | 4.966065  | 8.071532  | 15.525932 |
| H  | 3.556394  | 7.209065  | 16.141870 |
| H  | 0.432092  | 8.531551  | 13.651673 |
| H  | 0.800650  | 9.368926  | 15.171032 |
| H  | 0.818010  | 7.600062  | 15.099340 |
| H  | 6.746082  | 13.878801 | 9.325281  |
| H  | 7.564749  | 12.321179 | 9.486147  |
| H  | 8.504021  | 13.825380 | 9.538459  |
| H  | 8.885254  | 11.485124 | 12.171276 |
| H  | 8.730470  | 12.497869 | 13.619181 |
| H  | 9.726149  | 13.035686 | 12.262366 |
| H  | 7.220343  | 15.309488 | 13.363438 |
| H  | 6.544204  | 15.805340 | 11.806551 |
| H  | 8.297118  | 15.709279 | 12.011664 |
| H  | -0.048136 | 17.736414 | 17.602067 |



|   |           |           |           |
|---|-----------|-----------|-----------|
| H | 1.940981  | 18.552653 | 17.906637 |
| H | 4.603071  | 15.758616 | 19.521128 |
| H | -0.364467 | 13.753422 | 18.856177 |
| H | 3.614212  | 13.814373 | 19.891747 |
| H | 1.553906  | 12.995205 | 19.642793 |
| H | 0.770730  | 18.067227 | 15.217138 |
| H | 1.312514  | 19.014255 | 13.822118 |
| H | 2.466659  | 18.557996 | 15.083170 |
| H | 2.976575  | 17.841276 | 11.601304 |
| H | 3.602180  | 16.183321 | 11.680595 |
| H | 4.245844  | 17.428559 | 12.759815 |
| H | 4.022634  | 19.179096 | 21.178574 |
| H | 3.054139  | 20.116820 | 20.035369 |
| H | 4.773343  | 20.491252 | 20.250174 |
| H | 3.611005  | 19.855269 | 16.924167 |
| H | 4.834327  | 18.701274 | 16.360061 |
| H | 5.320030  | 20.161405 | 17.235590 |
| H | 6.464939  | 16.950941 | 18.437584 |
| H | 6.264417  | 17.265432 | 20.173142 |
| H | 6.942527  | 18.510514 | 19.121347 |
| H | 0.574407  | 15.163897 | 12.066314 |
| H | 0.145480  | 16.872775 | 11.896285 |
| H | -0.434233 | 15.960068 | 13.289451 |
| H | -2.788482 | 16.377527 | 20.103548 |
| H | -2.651246 | 14.619006 | 19.996349 |
| H | -4.015480 | 15.444901 | 19.224356 |
| H | -1.905388 | 17.448870 | 16.031192 |
| H | -2.365419 | 18.172048 | 17.585238 |
| H | -3.527339 | 17.195335 | 16.683855 |
| H | -1.980533 | 13.272968 | 17.185290 |
| H | -1.744783 | 14.314607 | 15.772785 |
| H | -3.350927 | 14.154767 | 16.502137 |

|    |          |           |           |
|----|----------|-----------|-----------|
| H  | 0.689975 | 14.321844 | 14.478814 |
| H  | 0.713557 | 12.496354 | 15.733973 |
| H  | 2.237087 | 11.277699 | 16.772947 |
| H  | 5.860644 | 15.106428 | 15.840008 |
| H  | 4.379979 | 16.307323 | 14.853310 |
| H  | 4.439397 | 11.356050 | 17.047572 |
| Si | 6.745933 | 12.798537 | 17.095685 |
| C  | 8.090229 | 14.034290 | 16.585101 |
| C  | 6.601305 | 12.819188 | 18.989696 |
| C  | 7.278360 | 11.056835 | 16.565569 |
| H  | 8.231158 | 10.794786 | 17.039178 |
| H  | 6.544965 | 10.298330 | 16.856621 |
| H  | 7.409219 | 10.998145 | 15.481162 |
| H  | 7.551735 | 12.542715 | 19.459409 |
| H  | 6.325777 | 13.816683 | 19.346303 |
| H  | 5.838409 | 12.114197 | 19.335933 |
| H  | 9.054924 | 13.700456 | 16.983079 |
| H  | 8.188609 | 14.111755 | 15.498183 |
| H  | 7.905235 | 15.037154 | 16.983540 |

**Y<sub>2</sub>(1,5-COT)(1,4-COT)<sub>2</sub>:**

|    |          |           |           |
|----|----------|-----------|-----------|
| C  | 5.326367 | 9.339080  | 16.653977 |
| Si | 5.173882 | 11.028311 | 17.503968 |
| C  | 4.334105 | 10.758353 | 19.184894 |
| C  | 6.914624 | 11.719589 | 17.803136 |
| C  | 4.128409 | 12.236278 | 16.456299 |
| C  | 4.637254 | 13.548458 | 16.260930 |
| C  | 4.224029 | 14.683977 | 15.489717 |
| Y  | 4.415468 | 12.509980 | 13.900062 |
| C  | 6.695292 | 12.133137 | 12.840630 |
| Si | 8.545056 | 12.252723 | 13.298491 |
| C  | 9.151466 | 10.682651 | 14.174090 |

|    |           |           |           |
|----|-----------|-----------|-----------|
| Y  | 2.313082  | 15.261038 | 17.312671 |
| C  | 0.272254  | 15.684783 | 18.837565 |
| Si | -1.626033 | 15.503228 | 18.936449 |
| C  | -2.514111 | 16.948343 | 18.084394 |
| C  | 2.840508  | 11.734906 | 16.108548 |
| C  | 1.589823  | 12.320870 | 15.825838 |
| C  | 1.088741  | 13.579804 | 15.436801 |
| C  | 1.661430  | 14.750660 | 14.864385 |
| Si | 0.487347  | 15.895735 | 13.882166 |
| C  | 0.796931  | 15.692382 | 12.020317 |
| C  | 3.033573  | 15.122520 | 14.821988 |
| C  | 0.751533  | 16.943086 | 18.377853 |
| C  | 2.013203  | 17.575410 | 18.213620 |
| C  | 3.377852  | 17.260518 | 18.483211 |
| Si | 4.564385  | 18.685131 | 18.028859 |
| C  | 4.304715  | 19.244773 | 16.231748 |
| C  | 3.694016  | 13.214681 | 11.556117 |
| C  | 3.106080  | 11.949962 | 11.800121 |
| C  | 3.546068  | 10.696883 | 12.311328 |
| Si | 2.219689  | 9.323699  | 12.268233 |
| C  | 2.395861  | 8.131532  | 13.735399 |
| C  | 4.967106  | 13.793583 | 11.757938 |
| C  | 6.195037  | 13.352993 | 12.301300 |
| C  | 6.090135  | 10.854203 | 13.014632 |
| C  | 4.814666  | 10.270407 | 12.795861 |
| C  | 0.470569  | 10.059509 | 12.317263 |
| C  | 2.436436  | 8.342076  | 10.658220 |
| C  | 8.880115  | 13.750480 | 14.419908 |
| C  | 9.529310  | 12.471705 | 11.691673 |
| C  | 0.949501  | 14.532834 | 19.327976 |
| C  | 2.291109  | 14.185493 | 19.610286 |
| C  | 3.538296  | 14.844101 | 19.509045 |

|   |           |           |           |
|---|-----------|-----------|-----------|
| C | 3.983359  | 16.105770 | 19.048147 |
| C | -1.326386 | 15.470427 | 14.223878 |
| C | 0.789118  | 17.719153 | 14.318220 |
| C | 6.379023  | 18.169881 | 18.231664 |
| C | 4.206263  | 20.147048 | 19.183321 |
| C | -2.219631 | 13.870897 | 18.167858 |
| C | -2.101161 | 15.514110 | 20.773497 |
| H | 6.747151  | 10.149961 | 13.518292 |
| H | 4.792939  | 9.258687  | 13.194987 |
| H | 2.040406  | 11.973600 | 11.588043 |
| H | 6.903820  | 14.176544 | 12.375410 |
| H | 2.965147  | 13.942133 | 11.212310 |
| H | 4.974371  | 14.857779 | 11.533126 |
| H | 5.870856  | 8.645501  | 17.304622 |
| H | 5.871395  | 9.418870  | 15.708940 |
| H | 4.349148  | 8.894963  | 16.442204 |
| H | 4.334740  | 11.678501 | 19.777119 |
| H | 4.858656  | 9.987657  | 19.760346 |
| H | 3.295220  | 10.437702 | 19.058743 |
| H | 3.431197  | 7.886847  | 10.611828 |
| H | 2.330412  | 8.997827  | 9.787889  |
| H | 1.692174  | 7.542488  | 10.575121 |
| H | 2.293789  | 8.661538  | 14.687488 |
| H | 3.355250  | 7.604963  | 13.738900 |
| H | 1.607988  | 7.371544  | 13.686439 |
| H | 0.223915  | 10.613601 | 11.405949 |
| H | 0.348816  | 10.731755 | 13.172680 |
| H | -0.262014 | 9.250550  | 12.413907 |
| H | 7.496264  | 10.997112 | 18.386244 |
| H | 6.895836  | 12.656137 | 18.370096 |
| H | 7.450154  | 11.895930 | 16.865271 |
| H | 9.208488  | 13.369530 | 11.153705 |

|   |           |           |           |
|---|-----------|-----------|-----------|
| H | 9.376285  | 11.614580 | 11.027999 |
| H | 10.602417 | 12.562047 | 11.892309 |
| H | 9.079059  | 9.803742  | 13.525201 |
| H | 8.597150  | 10.474513 | 15.094539 |
| H | 10.206295 | 10.805013 | 14.443660 |
| H | 8.355541  | 13.657733 | 15.376222 |
| H | 8.564254  | 14.688792 | 13.952579 |
| H | 9.952091  | 13.833295 | 14.631146 |
| H | -0.039904 | 17.566850 | 17.969577 |
| H | 1.893375  | 18.528177 | 17.698844 |
| H | 5.068788  | 16.154250 | 19.049692 |
| H | 0.290163  | 13.680116 | 19.478779 |
| H | 4.368288  | 14.186338 | 19.754529 |
| H | 2.395286  | 13.145198 | 19.906499 |
| H | 0.585338  | 17.917248 | 15.375520 |
| H | 0.131375  | 18.360064 | 13.720294 |
| H | 1.820362  | 18.022193 | 14.111316 |
| H | 0.118759  | 16.334272 | 11.446955 |
| H | 0.628532  | 14.657205 | 11.707490 |
| H | 1.822231  | 15.968324 | 11.754571 |
| H | 4.384025  | 19.866064 | 20.226427 |
| H | 3.162378  | 20.466165 | 19.099487 |
| H | 4.842840  | 21.006744 | 18.947562 |
| H | 3.272969  | 19.556756 | 16.042402 |
| H | 4.546184  | 18.436048 | 15.533655 |
| H | 4.955629  | 20.095167 | 15.999890 |
| H | 6.638232  | 17.313667 | 17.599999 |
| H | 6.621674  | 17.917325 | 19.268817 |
| H | 7.024839  | 19.004625 | 17.937664 |
| H | -1.583123 | 14.463919 | 13.878729 |
| H | -1.967154 | 16.176426 | 13.684163 |
| H | -1.574508 | 15.542310 | 15.286484 |

|   |           |           |           |
|---|-----------|-----------|-----------|
| H | -1.786294 | 16.451019 | 21.244529 |
| H | -1.614143 | 14.693568 | 21.310073 |
| H | -3.183645 | 15.411574 | 20.907276 |
| H | -2.244995 | 17.048513 | 17.028329 |
| H | -2.303681 | 17.900441 | 18.582486 |
| H | -3.596229 | 16.784812 | 18.135261 |
| H | -1.750317 | 13.001605 | 18.639225 |
| H | -2.000887 | 13.830222 | 17.096624 |
| H | -3.303084 | 13.769144 | 18.295833 |
| H | 0.001611  | 13.585916 | 15.424544 |
| H | 0.782965  | 11.596479 | 15.938227 |
| H | 2.741780  | 10.663111 | 16.278983 |
| H | 5.627186  | 13.710002 | 16.681085 |
| H | 5.029519  | 15.409069 | 15.385912 |
| H | 3.230615  | 16.032404 | 14.256065 |

**La<sub>2</sub>(1,4-COT)<sub>3</sub>:**

|    |           |           |           |
|----|-----------|-----------|-----------|
| La | 10.091115 | 20.492679 | -1.281210 |
| C  | 11.587972 | 19.295291 | 0.983869  |
| C  | 10.292559 | 19.541925 | 1.523418  |
| La | 10.362656 | 16.586917 | 1.271583  |
| C  | 9.790914  | 15.478931 | 3.706383  |
| C  | 11.208413 | 15.604059 | 3.718736  |
| Si | 11.973591 | 16.373231 | 5.287835  |
| C  | 12.962825 | 17.941501 | 4.861906  |
| C  | 12.142887 | 18.619820 | -0.143401 |
| C  | 11.517792 | 17.877192 | -1.188980 |
| H  | 12.224590 | 17.463303 | -1.905854 |
| C  | 8.935632  | 19.235250 | 1.194858  |
| C  | 8.382362  | 18.491650 | 0.113589  |
| C  | 8.898011  | 17.791300 | -1.008571 |
| C  | 10.187794 | 17.533212 | -1.540499 |

|    |           |           |           |
|----|-----------|-----------|-----------|
| C  | 11.536250 | 22.490875 | -2.467954 |
| C  | 11.139117 | 21.633144 | -3.526959 |
| C  | 9.934073  | 21.024758 | -3.984335 |
| Si | 10.177011 | 20.023891 | -5.588697 |
| C  | 8.652693  | 18.967529 | -5.997987 |
| C  | 10.910678 | 23.133058 | -1.361966 |
| Si | 12.034197 | 24.225814 | -0.276326 |
| C  | 11.428899 | 26.021045 | -0.388292 |
| Si | 7.680643  | 19.951846 | 2.456040  |
| C  | 7.991595  | 21.805659 | 2.704426  |
| C  | 7.903869  | 19.080806 | 4.125117  |
| C  | 5.900348  | 19.705705 | 1.856812  |
| C  | 8.767536  | 14.358324 | 1.534072  |
| Si | 7.012007  | 13.835334 | 1.006900  |
| C  | 6.920965  | 13.441307 | -0.848496 |
| C  | 8.803599  | 14.979843 | 2.817147  |
| C  | 9.807234  | 13.982776 | 0.638054  |
| C  | 11.220738 | 14.061439 | 0.633458  |
| C  | 12.205995 | 14.564429 | 1.515128  |
| C  | 12.198431 | 15.212800 | 2.772299  |
| C  | 9.553923  | 23.156066 | -0.927466 |
| C  | 8.330988  | 22.603283 | -1.375398 |
| C  | 7.938206  | 21.747847 | -2.431727 |
| C  | 8.598536  | 21.092469 | -3.499160 |
| C  | 10.474497 | 21.235194 | -7.018884 |
| C  | 11.674248 | 18.859107 | -5.457312 |
| C  | 6.529084  | 12.285439 | 1.989915  |
| C  | 5.737938  | 15.200908 | 1.366500  |
| C  | 13.152130 | 15.110005 | 6.073426  |
| C  | 10.647371 | 16.832276 | 6.564115  |
| C  | 13.843619 | 24.163577 | -0.845972 |
| C  | 11.963533 | 23.676285 | 1.543184  |

|    |           |           |           |
|----|-----------|-----------|-----------|
| H  | 10.378664 | 20.140056 | 2.429027  |
| H  | 12.347390 | 19.756234 | 1.609024  |
| Si | 14.051077 | 18.702094 | -0.326835 |
| H  | 7.762824  | 17.999645 | 4.026533  |
| H  | 8.907150  | 19.255833 | 4.527020  |
| H  | 7.181375  | 19.453240 | 4.859350  |
| H  | 5.628242  | 18.648972 | 1.774238  |
| H  | 5.216494  | 20.162471 | 2.581244  |
| H  | 5.722500  | 20.185965 | 0.889196  |
| H  | 7.857951  | 22.356330 | 1.768788  |
| H  | 7.287218  | 22.209882 | 3.439991  |
| H  | 9.002748  | 22.006171 | 3.072606  |
| H  | 7.808129  | 15.177746 | 3.213114  |
| H  | 9.322310  | 15.935429 | 4.575219  |
| H  | 13.208517 | 15.504194 | 3.062152  |
| H  | 13.205070 | 14.498381 | 1.090927  |
| H  | 11.649331 | 13.706273 | -0.301634 |
| H  | 9.438194  | 13.576259 | -0.300205 |
| H  | 7.537474  | 12.579682 | -1.123286 |
| H  | 5.886223  | 13.199064 | -1.116179 |
| H  | 7.231463  | 14.293096 | -1.462534 |
| H  | 6.578219  | 12.478040 | 3.066564  |
| H  | 5.511845  | 11.958216 | 1.749151  |
| H  | 7.214046  | 11.460138 | 1.770815  |
| H  | 5.704921  | 15.478451 | 2.424537  |
| H  | 5.958247  | 16.102346 | 0.785449  |
| H  | 4.735028  | 14.858735 | 1.087727  |
| H  | 12.303692 | 18.717628 | 4.458444  |
| H  | 13.456200 | 18.347252 | 5.751989  |
| H  | 13.738365 | 17.737344 | 4.116677  |
| H  | 13.619619 | 15.518222 | 6.976277  |
| H  | 12.609837 | 14.200802 | 6.351749  |



|   |           |           |           |
|---|-----------|-----------|-----------|
| H | 13.950817 | 14.820639 | 5.383387  |
| H | 9.947963  | 17.585328 | 6.187899  |
| H | 10.069087 | 15.958190 | 6.880359  |
| H | 11.131661 | 17.247221 | 7.454981  |
| H | 10.142948 | 16.930075 | -2.443289 |
| H | 8.111487  | 17.344973 | -1.610454 |
| H | 7.297773  | 18.444587 | 0.134957  |
| H | 12.612998 | 22.644439 | -2.487613 |
| H | 12.009835 | 21.321438 | -4.103047 |
| H | 7.911265  | 20.451304 | -4.046122 |
| H | 6.885567  | 21.478670 | -2.373064 |
| H | 7.503216  | 22.836625 | -0.709299 |
| H | 9.410559  | 23.708561 | 0.000565  |
| H | 11.485295 | 26.382685 | -1.419796 |
| H | 12.035504 | 26.682899 | 0.239428  |
| H | 10.387526 | 26.109659 | -0.063079 |
| H | 14.267247 | 23.155895 | -0.786515 |
| H | 14.446125 | 24.812044 | -0.200346 |
| H | 13.960097 | 24.523088 | -1.873280 |
| H | 12.344875 | 22.655682 | 1.656198  |
| H | 10.941261 | 23.698397 | 1.933386  |
| H | 12.572538 | 24.334727 | 2.172464  |
| H | 8.409601  | 18.262338 | -5.196406 |
| H | 8.852989  | 18.383588 | -6.903207 |
| H | 7.766788  | 19.579360 | -6.194640 |
| H | 10.634282 | 20.705262 | -7.964104 |
| H | 11.352404 | 21.860723 | -6.828509 |
| H | 9.614862  | 21.901894 | -7.142761 |
| H | 11.535381 | 18.137423 | -4.645727 |
| H | 12.607122 | 19.400473 | -5.271823 |
| H | 11.801163 | 18.297879 | -6.389751 |
| C | 14.489808 | 19.426100 | -2.024288 |

|   |           |           |           |
|---|-----------|-----------|-----------|
| C | 14.816846 | 19.792483 | 1.020061  |
| C | 14.795235 | 16.963193 | -0.201743 |
| H | 15.875664 | 16.995916 | -0.379882 |
| H | 14.627997 | 16.539024 | 0.793038  |
| H | 14.355837 | 16.281663 | -0.936720 |
| H | 15.901626 | 19.830251 | 0.871723  |
| H | 14.444950 | 20.821323 | 0.980564  |
| H | 14.638279 | 19.401011 | 2.026505  |
| H | 15.577300 | 19.475767 | -2.147696 |
| H | 14.091393 | 18.817495 | -2.842180 |
| H | 14.091080 | 20.439422 | -2.136234 |

**La<sub>2</sub>(1,5-COT)(1,4-COT)<sub>2</sub>:**

|    |           |           |           |
|----|-----------|-----------|-----------|
| C  | 6.755368  | 18.363389 | 3.238386  |
| Si | 7.255763  | 19.710512 | 2.001112  |
| C  | 7.624894  | 21.308415 | 2.953101  |
| C  | 8.799996  | 19.164131 | 1.000800  |
| La | 10.173470 | 20.532277 | -1.292018 |
| C  | 11.721721 | 22.245697 | -2.736869 |
| C  | 10.941627 | 21.560270 | -3.704617 |
| C  | 9.566731  | 21.241362 | -3.893370 |
| Si | 9.128933  | 20.306685 | -5.496350 |
| C  | 10.676219 | 19.693315 | -6.408784 |
| C  | 10.049927 | 19.610206 | 1.521912  |
| La | 10.502121 | 16.661119 | 1.292008  |
| C  | 12.531595 | 14.919497 | 1.933533  |
| C  | 11.751854 | 14.236771 | 0.970582  |
| C  | 10.372912 | 13.972655 | 0.790829  |
| C  | 9.178621  | 14.254142 | 1.510911  |
| Si | 7.595440  | 13.474476 | 0.789550  |
| C  | 6.133018  | 14.688999 | 0.838161  |
| C  | 8.508729  | 18.361545 | -0.141027 |

|    |           |           |           |
|----|-----------|-----------|-----------|
| C  | 9.255550  | 17.720159 | -1.166876 |
| C  | 10.625668 | 17.583191 | -1.521923 |
| C  | 11.875599 | 18.029265 | -1.000811 |
| Si | 13.419829 | 17.482880 | -2.001124 |
| C  | 13.050709 | 15.884949 | -2.953069 |
| C  | 11.420045 | 19.473237 | 1.166864  |
| C  | 12.166866 | 18.831852 | 0.141015  |
| C  | 8.953885  | 14.947695 | 2.736870  |
| C  | 9.733962  | 15.633146 | 3.704615  |
| C  | 11.108853 | 15.952078 | 3.893372  |
| Si | 11.546625 | 16.886776 | 5.496347  |
| C  | 9.999325  | 17.500144 | 6.408759  |
| C  | 12.264976 | 15.637108 | 3.122683  |
| C  | 5.795442  | 20.018391 | 0.830779  |
| C  | 7.834259  | 12.934886 | -1.015445 |
| C  | 7.150602  | 11.950258 | 1.828528  |
| C  | 12.645219 | 18.395451 | 5.131392  |
| C  | 12.495934 | 15.706551 | 6.640084  |
| C  | 11.497005 | 22.939237 | -1.510899 |
| Si | 13.080201 | 23.718874 | -0.789540 |
| C  | 14.542621 | 22.504354 | -0.838234 |
| C  | 10.302724 | 23.220732 | -0.790804 |
| C  | 8.923776  | 22.956640 | -0.970551 |
| C  | 8.144018  | 22.273938 | -1.933506 |
| C  | 8.410618  | 21.556339 | -3.122668 |
| C  | 13.920193 | 18.829976 | -3.238439 |
| C  | 14.880165 | 17.175051 | -0.830796 |
| C  | 12.841419 | 24.258393 | 1.015482  |
| C  | 13.525015 | 25.243137 | -1.828464 |
| C  | 8.030331  | 18.798014 | -5.131401 |
| C  | 8.179621  | 21.486930 | -6.640063 |
| H  | 9.947504  | 20.222540 | 2.413678  |

|   |           |           |           |
|---|-----------|-----------|-----------|
| H | 12.068454 | 19.997243 | 1.864309  |
| H | 13.231087 | 18.998635 | 0.284765  |
| H | 6.519169  | 17.425971 | 2.725276  |
| H | 7.558146  | 18.160976 | 3.954040  |
| H | 5.868678  | 18.670555 | 3.803937  |
| H | 5.458712  | 19.105026 | 0.330624  |
| H | 4.945164  | 20.404212 | 1.403893  |
| H | 6.046141  | 20.755516 | 0.062100  |
| H | 7.989365  | 22.098068 | 2.288914  |
| H | 6.704708  | 21.666818 | 3.427400  |
| H | 8.362150  | 21.163895 | 3.749113  |
| H | 7.895630  | 15.031513 | 2.981811  |
| H | 9.092644  | 16.078219 | 4.461984  |
| H | 13.178161 | 16.082260 | 3.516649  |
| H | 13.583581 | 14.957575 | 1.657812  |
| H | 12.351693 | 13.879467 | 0.135900  |
| H | 10.194214 | 13.464175 | -0.153465 |
| H | 8.582514  | 12.142839 | -1.118783 |
| H | 6.887479  | 12.539643 | -1.400042 |
| H | 8.130295  | 13.770120 | -1.658700 |
| H | 7.000422  | 12.224312 | 2.877653  |
| H | 6.233738  | 11.471267 | 1.467707  |
| H | 7.957831  | 11.211608 | 1.793124  |
| H | 5.876842  | 14.993217 | 1.857757  |
| H | 6.350966  | 15.592229 | 0.258670  |
| H | 5.242269  | 14.219802 | 0.405819  |
| H | 12.110759 | 19.123500 | 4.512025  |
| H | 12.931787 | 18.893600 | 6.064276  |
| H | 13.566922 | 18.121275 | 4.608569  |
| H | 12.801874 | 16.207792 | 7.564939  |
| H | 11.873683 | 14.846598 | 6.907662  |
| H | 13.395918 | 15.322771 | 6.149285  |

|   |           |           |           |
|---|-----------|-----------|-----------|
| H | 9.413216  | 18.200723 | 5.805170  |
| H | 9.343593  | 16.677767 | 6.711417  |
| H | 10.305392 | 18.026734 | 7.319556  |
| H | 10.728091 | 16.970856 | -2.413688 |
| H | 8.607140  | 17.196153 | -1.864320 |
| H | 7.444507  | 18.194762 | -0.284776 |
| H | 14.156376 | 19.767414 | -2.725360 |
| H | 13.117409 | 19.032351 | -3.954096 |
| H | 14.806887 | 18.522810 | -3.803985 |
| H | 15.216898 | 18.088438 | -0.330683 |
| H | 15.730437 | 16.789210 | -1.403906 |
| H | 14.629479 | 16.437957 | -0.062085 |
| H | 12.686250 | 15.095309 | -2.288861 |
| H | 13.970895 | 15.526543 | -3.427366 |
| H | 12.313447 | 16.029442 | -3.749080 |
| H | 12.779972 | 22.161866 | -2.981818 |
| H | 11.582933 | 21.115198 | -4.461996 |
| H | 7.497423  | 21.111207 | -3.516633 |
| H | 7.092033  | 22.235873 | -1.657778 |
| H | 8.323948  | 23.313941 | -0.135860 |
| H | 10.481436 | 23.729196 | 0.153496  |
| H | 12.093174 | 25.050444 | 1.118864  |
| H | 13.788209 | 24.653609 | 1.400080  |
| H | 12.545383 | 23.423135 | 1.658707  |
| H | 13.675168 | 24.969128 | -2.877604 |
| H | 14.441888 | 25.722112 | -1.467645 |
| H | 12.717787 | 25.981786 | -1.793008 |
| H | 14.798770 | 22.200172 | -1.857847 |
| H | 14.324690 | 21.601103 | -0.258768 |
| H | 15.433382 | 22.973536 | -0.405900 |
| H | 8.564796  | 18.069947 | -4.512060 |
| H | 7.743738  | 18.299887 | -6.064288 |

|   |           |           |           |
|---|-----------|-----------|-----------|
| H | 7.108643  | 19.072190 | -4.608553 |
| H | 7.873667  | 20.985701 | -7.564921 |
| H | 8.801876  | 22.346881 | -6.907639 |
| H | 7.279645  | 21.870712 | -6.149250 |
| H | 11.262327 | 18.992724 | -5.805209 |
| H | 11.331955 | 20.515690 | -6.711438 |
| H | 10.370139 | 19.166738 | -7.319584 |

**Nd<sub>2</sub>(1,4-COT)<sub>3</sub>:**

|    |           |           |           |
|----|-----------|-----------|-----------|
| C  | 4.703790  | 12.925637 | 6.155256  |
| Si | 6.059288  | 14.253956 | 6.044744  |
| C  | 5.642138  | 15.424199 | 4.610952  |
| C  | 7.779192  | 13.458707 | 5.829589  |
| C  | 8.109481  | 12.579756 | 6.901212  |
| C  | 9.233040  | 11.808115 | 7.278629  |
| C  | 10.510859 | 11.550837 | 6.729807  |
| C  | 11.214840 | 11.967880 | 5.574821  |
| C  | 10.950123 | 12.832707 | 4.477758  |
| Si | 12.400315 | 13.091448 | 3.267077  |
| C  | 11.836811 | 12.928469 | 1.458690  |
| C  | 6.054738  | 15.258699 | 7.654809  |
| Nd | 8.791386  | 11.199822 | 4.684445  |
| C  | 6.621166  | 10.148568 | 3.048294  |
| C  | 7.674050  | 10.317272 | 2.096654  |
| Si | 7.148020  | 11.348670 | 0.566247  |
| C  | 8.471178  | 11.265810 | -0.786973 |
| C  | 8.523213  | 13.876617 | 4.690661  |
| C  | 9.806693  | 13.617110 | 4.143304  |
| C  | 6.424901  | 9.491550  | 4.297813  |
| C  | 7.191678  | 8.689196  | 5.193499  |
| C  | 8.552765  | 8.267628  | 5.134590  |
| C  | 9.634107  | 8.435731  | 4.233273  |

|    |           |           |           |
|----|-----------|-----------|-----------|
| C  | 9.824120  | 9.081086  | 2.983909  |
| C  | 9.019278  | 9.850263  | 2.102940  |
| Nd | 7.478589  | 7.384724  | 2.552668  |
| C  | 7.277894  | 4.756832  | 3.028463  |
| C  | 5.942363  | 5.195590  | 2.834117  |
| C  | 5.237761  | 5.989160  | 1.885245  |
| C  | 5.669767  | 6.641090  | 0.694290  |
| C  | 6.888404  | 6.769303  | -0.012465 |
| C  | 8.219239  | 6.331969  | 0.184284  |
| C  | 8.896523  | 5.568376  | 1.165249  |
| C  | 8.532361  | 4.895528  | 2.364529  |
| Si | 9.929829  | 3.909684  | 3.207700  |
| C  | 9.646266  | 2.062870  | 2.874239  |
| C  | 9.946344  | 4.188449  | 5.088155  |
| C  | 11.637578 | 4.397535  | 2.536709  |
| C  | 13.094042 | 14.837812 | 3.532220  |
| C  | 13.788554 | 11.829856 | 3.555909  |
| Si | 6.277533  | 8.053189  | 6.756314  |
| C  | 4.442800  | 8.522068  | 6.708286  |
| C  | 7.055650  | 8.783971  | 8.323299  |
| C  | 6.420718  | 6.164555  | 6.851335  |
| C  | 6.874671  | 13.156988 | 1.065901  |
| C  | 5.518456  | 10.671846 | -0.128118 |
| Si | 3.362228  | 6.177951  | 2.177682  |
| C  | 2.442992  | 5.382474  | 0.720084  |
| C  | 2.811862  | 5.317608  | 3.777263  |
| C  | 2.861722  | 8.008845  | 2.283917  |
| H  | 7.947791  | 14.514003 | 4.023791  |
| H  | 9.913841  | 14.123212 | 3.184241  |
| H  | 12.168340 | 11.451978 | 5.493290  |
| H  | 11.056885 | 10.798949 | 7.295832  |
| H  | 9.041188  | 11.209071 | 8.165363  |

|   |           |           |          |
|---|-----------|-----------|----------|
| H | 7.282227  | 12.419311 | 7.592628 |
| H | 3.721890  | 13.382169 | 6.321497 |
| H | 4.889956  | 12.230920 | 6.980655 |
| H | 4.654115  | 12.344169 | 5.228751 |
| H | 5.072823  | 15.710121 | 7.834591 |
| H | 6.795658  | 16.063181 | 7.606837 |
| H | 6.301584  | 14.633738 | 8.518667 |
| H | 5.608747  | 14.911448 | 3.644586 |
| H | 6.363636  | 16.243962 | 4.535715 |
| H | 4.655483  | 15.868323 | 4.783181 |
| H | 12.325016 | 15.596885 | 3.357255 |
| H | 13.931562 | 15.041766 | 2.856074 |
| H | 13.448652 | 14.958148 | 4.560841 |
| H | 5.407959  | 9.648041  | 4.645520 |
| H | 5.700213  | 10.641316 | 2.742881 |
| H | 9.580195  | 10.143763 | 1.221067 |
| H | 10.834762 | 8.950942  | 2.607454 |
| H | 10.538258 | 7.941910  | 4.578006 |
| H | 8.854889  | 7.665608  | 5.989252 |
| H | 6.919524  | 9.868734  | 8.360675 |
| H | 8.129015  | 8.576337  | 8.376461 |
| H | 6.587566  | 8.353148  | 9.215263 |
| H | 7.463121  | 5.834531  | 6.898791 |
| H | 5.958738  | 5.690348  | 5.979963 |
| H | 5.914283  | 5.791564  | 7.748470 |
| H | 3.950418  | 8.116208  | 7.598920 |
| H | 3.933895  | 8.104482  | 5.833891 |
| H | 4.284799  | 9.605081  | 6.713133 |
| H | 6.532978  | 13.748300 | 0.209307 |
| H | 7.796873  | 13.608375 | 1.444104 |
| H | 6.114672  | 13.236049 | 1.849829 |
| H | 4.699264  | 10.749500 | 0.593397 |



|   |           |           |           |
|---|-----------|-----------|-----------|
| H | 5.621443  | 9.619435  | -0.408462 |
| H | 5.225273  | 11.235150 | -1.020872 |
| H | 7.362180  | 4.221659  | 3.973531  |
| H | 5.316646  | 4.888884  | 3.668893  |
| H | 4.882589  | 7.222962  | 0.215540  |
| H | 6.795986  | 7.420841  | -0.878964 |
| H | 8.899087  | 6.738072  | -0.561913 |
| H | 9.964810  | 5.540942  | 0.965326  |
| H | 9.000805  | 3.904754  | 5.560266  |
| H | 10.140810 | 5.239304  | 5.326041  |
| H | 10.736864 | 3.586930  | 5.550537  |
| H | 12.409363 | 3.838659  | 3.077555  |
| H | 11.842384 | 5.464298  | 2.674886  |
| H | 11.751033 | 4.163093  | 1.473649  |
| H | 8.670572  | 1.741934  | 3.252883  |
| H | 10.415627 | 1.448398  | 3.354574  |
| H | 9.667357  | 1.857694  | 1.799212  |
| H | 3.024419  | 4.244005  | 3.757542  |
| H | 1.729024  | 5.436139  | 3.894580  |
| H | 3.286859  | 5.743115  | 4.667132  |
| H | 3.332745  | 8.492998  | 3.145977  |
| H | 1.776045  | 8.107201  | 2.394191  |
| H | 3.154348  | 8.562812  | 1.386480  |
| H | 2.719593  | 5.850703  | -0.229820 |
| H | 1.357947  | 5.476861  | 0.838486  |
| H | 2.686857  | 4.317801  | 0.646947  |
| H | 8.108999  | 11.800228 | -1.672140 |
| H | 9.410777  | 11.738095 | -0.483873 |
| H | 8.684213  | 10.235137 | -1.088136 |
| H | 12.673010 | 13.129782 | 0.780021  |
| H | 11.476907 | 11.914087 | 1.258788  |
| H | 11.033898 | 13.628518 | 1.207223  |

|   |           |           |          |
|---|-----------|-----------|----------|
| H | 14.576073 | 11.982420 | 2.809660 |
| H | 14.248639 | 11.939037 | 4.542937 |
| H | 13.433471 | 10.798743 | 3.456810 |

**Nd<sub>2</sub>(1,5-COT)(1,4-COT)<sub>2</sub>:**

|    |           |           |          |
|----|-----------|-----------|----------|
| C  | 4.489273  | 13.191242 | 5.336120 |
| Si | 5.923858  | 14.439610 | 5.300480 |
| C  | 5.696775  | 15.663774 | 6.732491 |
| C  | 5.828810  | 15.400021 | 3.666481 |
| C  | 7.605028  | 13.565200 | 5.513991 |
| C  | 8.598719  | 13.862880 | 4.538757 |
| C  | 9.948251  | 13.500664 | 4.287922 |
| Nd | 8.682943  | 11.186976 | 4.765111 |
| C  | 7.712659  | 10.361906 | 2.073488 |
| Nd | 7.412557  | 7.423174  | 2.522829 |
| C  | 6.150855  | 5.107598  | 2.999117 |
| C  | 5.155988  | 5.926641  | 2.388210 |
| Si | 3.481292  | 5.882739  | 3.300408 |
| C  | 2.333968  | 7.280787  | 2.722141 |
| C  | 7.647961  | 12.760996 | 6.688755 |
| C  | 8.623296  | 11.980302 | 7.350561 |
| C  | 9.969467  | 11.624282 | 7.100908 |
| C  | 10.918417 | 11.899626 | 6.087068 |
| C  | 10.942201 | 12.680347 | 4.898579 |
| Si | 12.616775 | 12.722492 | 3.986064 |
| C  | 13.762963 | 11.323470 | 4.564188 |
| C  | 12.391596 | 12.544016 | 2.106942 |
| C  | 13.456387 | 14.387558 | 4.337782 |
| C  | 6.596941  | 10.215115 | 2.947880 |
| C  | 6.335194  | 9.561174  | 4.183162 |
| C  | 7.057283  | 8.757386  | 5.107293 |
| C  | 8.384419  | 8.248260  | 5.213702 |

|    |           |           |           |
|----|-----------|-----------|-----------|
| C  | 9.500050  | 8.394968  | 4.339213  |
| C  | 9.761750  | 9.048902  | 3.103982  |
| C  | 9.039747  | 9.852770  | 2.179956  |
| Si | 7.418637  | 11.404775 | 0.488305  |
| C  | 5.578465  | 11.812088 | 0.290316  |
| C  | 7.994707  | 10.440499 | -1.038932 |
| C  | 8.412725  | 13.016113 | 0.571124  |
| C  | 7.501002  | 4.747286  | 2.748755  |
| C  | 8.494716  | 5.046551  | 1.774047  |
| Si | 10.177393 | 4.175321  | 1.988809  |
| C  | 11.609483 | 5.426671  | 1.956340  |
| C  | 5.179114  | 6.707407  | 1.199714  |
| C  | 6.128106  | 6.984086  | 0.186261  |
| C  | 7.474945  | 6.630130  | -0.062771 |
| C  | 8.451148  | 5.850849  | 0.599394  |
| C  | 10.408957 | 2.952978  | 0.555971  |
| C  | 10.272284 | 3.213615  | 3.622052  |
| C  | 2.643288  | 4.216894  | 2.948571  |
| C  | 3.705868  | 6.061430  | 5.179596  |
| H  | 8.216132  | 14.478639 | 3.728072  |
| H  | 10.275993 | 13.918974 | 3.337201  |
| H  | 11.830773 | 11.329331 | 6.243133  |
| H  | 10.345704 | 10.908188 | 7.828606  |
| H  | 8.218267  | 11.470490 | 8.221762  |
| H  | 6.686955  | 12.690952 | 7.197551  |
| H  | 3.526603  | 13.711923 | 5.283891  |
| H  | 4.488971  | 12.589675 | 6.250721  |
| H  | 4.547497  | 12.506380 | 4.483693  |
| H  | 4.733562  | 16.180961 | 6.662409  |
| H  | 6.490189  | 16.417988 | 6.723586  |
| H  | 5.736542  | 15.154247 | 7.700369  |
| H  | 5.944099  | 14.749851 | 2.793225  |

|    |           |           |           |
|----|-----------|-----------|-----------|
| H  | 6.586863  | 16.187496 | 3.608676  |
| H  | 4.848311  | 15.882901 | 3.590259  |
| H  | 12.823774 | 15.219623 | 4.012552  |
| H  | 14.417027 | 14.467745 | 3.817254  |
| H  | 13.638388 | 14.510003 | 5.410249  |
| H  | 5.309334  | 9.717035  | 4.505858  |
| H  | 5.706141  | 10.722529 | 2.590442  |
| H  | 9.678040  | 10.137806 | 1.346241  |
| H  | 10.787542 | 8.892853  | 2.781175  |
| H  | 10.390809 | 7.887481  | 4.696638  |
| Si | 8.678407  | 7.205568  | 6.799019  |
| H  | 8.299393  | 13.584957 | -0.358428 |
| H  | 9.479105  | 12.814804 | 0.711908  |
| H  | 8.078364  | 13.649278 | 1.397952  |
| H  | 5.198705  | 12.447569 | 1.096701  |
| H  | 4.962728  | 10.908027 | 0.246194  |
| H  | 5.432628  | 12.356904 | -0.648836 |
| H  | 7.884105  | 4.132006  | 3.559561  |
| H  | 5.823352  | 4.688775  | 3.949693  |
| H  | 4.266031  | 7.276449  | 1.043300  |
| H  | 5.751163  | 7.699696  | -0.541554 |
| H  | 7.879608  | 7.140727  | -0.933680 |
| H  | 9.412293  | 5.922412  | 0.091054  |
| H  | 9.515377  | 2.424942  | 3.678477  |
| H  | 10.155191 | 3.862883  | 4.495741  |
| H  | 11.253457 | 2.732183  | 3.698796  |
| H  | 12.573198 | 4.907984  | 2.009127  |
| H  | 11.548722 | 6.110360  | 2.809537  |
| H  | 11.609561 | 6.029363  | 1.042479  |
| H  | 9.617070  | 2.197151  | 0.563008  |
| H  | 11.373124 | 2.437704  | 0.627016  |
| H  | 10.369615 | 3.463323  | -0.411489 |

|   |           |           |           |
|---|-----------|-----------|-----------|
| H | 4.297229  | 5.246160  | 5.607639  |
| H | 2.729512  | 6.052395  | 5.676760  |
| H | 4.200925  | 7.006385  | 5.426631  |
| H | 2.789804  | 8.267223  | 2.857770  |
| H | 1.411272  | 7.257258  | 3.312464  |
| H | 2.049093  | 7.178067  | 1.670384  |
| H | 2.461971  | 4.094050  | 1.876039  |
| H | 1.682441  | 4.136050  | 3.468613  |
| H | 3.276406  | 3.385429  | 3.274356  |
| H | 7.864211  | 11.053203 | -1.937741 |
| H | 9.052084  | 10.164376 | -0.979432 |
| H | 7.413466  | 9.523046  | -1.166256 |
| H | 13.367884 | 12.550790 | 1.609612  |
| H | 11.894372 | 11.600140 | 1.860193  |
| H | 11.801972 | 13.360545 | 1.678894  |
| H | 14.686066 | 11.346913 | 3.974497  |
| H | 14.047208 | 11.425351 | 5.616199  |
| H | 13.306711 | 10.337361 | 4.427630  |
| C | 10.518730 | 6.799284  | 6.997624  |
| H | 6.418990  | 8.472398  | 5.941022  |
| C | 8.101402  | 8.169757  | 8.325963  |
| C | 7.685045  | 5.593795  | 6.716068  |
| H | 7.798845  | 5.024797  | 7.645463  |
| H | 6.618544  | 5.794726  | 6.575627  |
| H | 8.019412  | 4.960958  | 5.888993  |
| H | 10.664534 | 6.254136  | 7.936593  |
| H | 10.899292 | 6.164413  | 6.191134  |
| H | 11.133821 | 7.703752  | 7.042389  |
| H | 8.232457  | 7.557458  | 9.224967  |
| H | 8.681841  | 9.087759  | 8.452967  |
| H | 7.043781  | 8.444939  | 8.266428  |

**Tb<sub>2</sub>(1,4-COT)<sub>3</sub>:**

|    |           |           |           |
|----|-----------|-----------|-----------|
| C  | 5.609183  | 18.677469 | 9.124547  |
| Si | 6.393310  | 18.713532 | 7.394792  |
| C  | 5.982635  | 17.136561 | 6.406510  |
| C  | 4.842798  | 16.420480 | 6.866160  |
| C  | 4.126091  | 15.274252 | 6.448816  |
| C  | 4.247247  | 14.335677 | 5.398612  |
| C  | 5.139556  | 14.143514 | 4.319004  |
| C  | 6.279349  | 14.819493 | 3.797367  |
| Si | 6.916880  | 14.017498 | 2.189179  |
| C  | 7.270216  | 12.165261 | 2.432400  |
| C  | 8.268492  | 18.939225 | 7.610636  |
| C  | 5.711655  | 20.210323 | 6.447910  |
| C  | 6.840632  | 16.929466 | 5.286963  |
| Tb | 6.660715  | 14.590741 | 6.415054  |
| C  | 8.019683  | 14.871648 | 8.900606  |
| C  | 9.067029  | 14.750693 | 7.954988  |
| C  | 9.406620  | 13.833862 | 6.919926  |
| Si | 11.014701 | 14.316120 | 5.991738  |
| C  | 12.497359 | 14.293114 | 7.173500  |
| C  | 6.957408  | 15.994748 | 4.226089  |
| C  | 8.759819  | 12.640207 | 6.486759  |
| C  | 7.587543  | 11.899619 | 6.813758  |
| Tb | 8.844049  | 12.185937 | 9.361492  |
| C  | 10.503427 | 10.121224 | 9.436532  |
| C  | 9.290396  | 9.722250  | 10.069470 |
| C  | 8.408820  | 10.251311 | 11.046747 |
| C  | 8.318257  | 11.433036 | 11.835796 |
| Si | 6.879000  | 11.486588 | 13.084956 |
| C  | 5.946748  | 13.142020 | 13.015220 |
| C  | 6.488879  | 12.003686 | 7.721030  |
| C  | 6.207561  | 12.971855 | 8.727130  |

|    |           |           |           |
|----|-----------|-----------|-----------|
| C  | 6.841617  | 14.145904 | 9.212231  |
| Si | 5.185900  | 10.606927 | 7.524605  |
| C  | 4.861687  | 10.292501 | 5.682831  |
| C  | 5.791651  | 8.983817  | 8.293103  |
| C  | 3.556821  | 11.112599 | 8.353197  |
| C  | 5.575553  | 14.202255 | 0.858744  |
| C  | 8.501535  | 14.852351 | 1.562356  |
| C  | 9.160324  | 12.577550 | 11.928574 |
| C  | 10.369052 | 13.001267 | 11.330702 |
| C  | 11.251683 | 12.467330 | 10.364074 |
| C  | 11.304369 | 11.286715 | 9.585491  |
| Si | 11.212204 | 8.779184  | 8.283444  |
| C  | 12.616858 | 9.452401  | 7.197833  |
| C  | 9.877967  | 8.064826  | 7.133464  |
| C  | 11.895931 | 7.374208  | 9.360567  |
| C  | 7.603855  | 11.275703 | 14.826337 |
| C  | 5.620509  | 10.097679 | 12.784605 |
| C  | 11.355972 | 13.115645 | 4.565498  |
| C  | 10.845623 | 16.072544 | 5.299194  |
| H  | 7.676094  | 17.626931 | 5.263928  |
| H  | 7.844694  | 16.202632 | 3.633110  |
| H  | 4.912669  | 13.218777 | 3.789686  |
| H  | 3.530034  | 13.523133 | 5.491069  |
| H  | 3.343783  | 15.001517 | 7.153769  |
| H  | 4.453872  | 16.796030 | 7.809237  |
| H  | 5.913355  | 17.793083 | 9.693678  |
| H  | 4.515508  | 18.698273 | 9.086737  |
| H  | 5.931221  | 19.561734 | 9.685639  |
| H  | 8.793332  | 19.031718 | 6.654793  |
| H  | 8.708002  | 18.098801 | 8.157185  |
| H  | 8.468871  | 19.852910 | 8.181273  |
| H  | 5.930568  | 21.147858 | 6.970717  |

|   |           |           |           |
|---|-----------|-----------|-----------|
| H | 4.626253  | 20.131277 | 6.329477  |
| H | 6.150018  | 20.269433 | 5.446559  |
| H | 5.278980  | 12.787156 | 9.257773  |
| H | 7.512123  | 11.028320 | 6.167570  |
| H | 9.289740  | 12.153645 | 5.673517  |
| H | 4.063268  | 9.551126  | 5.568407  |
| H | 5.744061  | 9.902808  | 5.165994  |
| H | 4.550962  | 11.209702 | 5.174967  |
| H | 5.047383  | 8.194437  | 8.139366  |
| H | 5.960416  | 9.084515  | 9.369003  |
| H | 6.727996  | 8.654677  | 7.832399  |
| H | 3.186229  | 12.068810 | 7.970988  |
| H | 3.642091  | 11.188719 | 9.441867  |
| H | 2.797318  | 10.351861 | 8.141828  |
| H | 8.887908  | 8.795821  | 9.662808  |
| H | 7.544325  | 9.603716  | 11.167179 |
| H | 8.754769  | 13.356031 | 12.573122 |
| H | 10.639742 | 14.014450 | 11.619636 |
| H | 12.036311 | 13.169731 | 10.094939 |
| H | 12.140820 | 11.317268 | 8.892314  |
| H | 12.288240 | 10.293402 | 6.578983  |
| H | 13.479045 | 9.778586  | 7.787982  |
| H | 12.963158 | 8.660417  | 6.524668  |
| H | 9.048135  | 7.616298  | 7.688492  |
| H | 9.468575  | 8.838420  | 6.475756  |
| H | 10.308627 | 7.280095  | 6.501662  |
| H | 12.297794 | 6.560007  | 8.747494  |
| H | 12.697958 | 7.741241  | 10.008843 |
| H | 11.113499 | 6.960240  | 10.004535 |
| H | 8.137562  | 15.743521 | 9.537043  |
| H | 6.285209  | 14.604690 | 10.023391 |
| H | 5.177353  | 13.172938 | 13.794694 |



|   |           |           |           |
|---|-----------|-----------|-----------|
| H | 6.606945  | 14.000580 | 13.172749 |
| H | 5.449822  | 13.271814 | 12.048500 |
| H | 4.814589  | 10.179442 | 13.522415 |
| H | 5.164493  | 10.157828 | 11.791215 |
| H | 6.065141  | 9.103849  | 12.897293 |
| H | 6.820240  | 11.316603 | 15.590921 |
| H | 8.117807  | 10.313290 | 14.915975 |
| H | 8.333669  | 12.061150 | 15.046987 |
| H | 5.887887  | 13.739867 | -0.084113 |
| H | 4.638668  | 13.730488 | 1.171534  |
| H | 5.365261  | 15.259301 | 0.667211  |
| H | 8.824628  | 14.360238 | 0.638358  |
| H | 8.343500  | 15.910742 | 1.332014  |
| H | 9.324960  | 14.778694 | 2.279515  |
| H | 7.595838  | 11.711968 | 1.489484  |
| H | 8.061043  | 12.008306 | 3.173282  |
| H | 6.383266  | 11.620397 | 2.770574  |
| H | 9.776710  | 15.568506 | 8.060804  |
| H | 12.270967 | 13.428611 | 4.050757  |
| H | 11.513786 | 12.089959 | 4.913699  |
| H | 10.549901 | 13.105666 | 3.825417  |
| H | 13.397056 | 14.644410 | 6.656118  |
| H | 12.336445 | 14.944163 | 8.038622  |
| H | 12.693198 | 13.282588 | 7.543073  |
| H | 11.752929 | 16.355396 | 4.754223  |
| H | 9.997932  | 16.144347 | 4.611854  |
| H | 10.693469 | 16.809308 | 6.093987  |

**Tb<sub>2</sub>(1,5-COT)(1,4-COT)<sub>2</sub>:**

|    |          |           |          |
|----|----------|-----------|----------|
| C  | 3.777519 | 17.596316 | 8.959995 |
| Si | 4.901117 | 18.170743 | 7.540832 |
| C  | 6.487955 | 18.880928 | 8.308764 |

|    |           |           |           |
|----|-----------|-----------|-----------|
| C  | 4.016509  | 19.554126 | 6.588712  |
| C  | 5.283314  | 16.751454 | 6.326777  |
| C  | 6.407397  | 17.008129 | 5.488786  |
| C  | 7.083213  | 16.356045 | 4.424794  |
| Tb | 6.730329  | 14.546426 | 6.281195  |
| C  | 9.362023  | 13.497472 | 6.692898  |
| C  | 8.539273  | 12.359917 | 6.467071  |
| C  | 7.333300  | 11.822502 | 6.993582  |
| C  | 6.390091  | 12.191714 | 7.994472  |
| Si | 4.937762  | 10.950371 | 8.185930  |
| C  | 5.564219  | 9.327020  | 8.935109  |
| C  | 4.365457  | 15.665694 | 6.363532  |
| C  | 4.188810  | 14.462626 | 5.639860  |
| C  | 4.865733  | 13.808497 | 4.585035  |
| C  | 6.012791  | 14.075894 | 3.804040  |
| C  | 6.960513  | 15.133423 | 3.707007  |
| Si | 8.205682  | 14.862774 | 2.289642  |
| C  | 7.267664  | 14.988418 | 0.644335  |
| C  | 9.588739  | 16.162612 | 2.302198  |
| C  | 9.015062  | 13.145343 | 2.393889  |
| C  | 7.192580  | 14.460246 | 9.085316  |
| Tb | 9.001523  | 12.273749 | 9.271187  |
| C  | 8.771352  | 11.686759 | 11.845378 |
| C  | 9.719066  | 12.744293 | 11.748339 |
| C  | 10.866119 | 13.011696 | 10.967338 |
| C  | 11.543044 | 12.357570 | 9.912512  |
| C  | 11.366402 | 11.154499 | 9.188844  |
| C  | 10.448554 | 10.068732 | 9.225606  |
| Si | 10.830770 | 8.649445  | 8.011556  |
| C  | 9.243949  | 7.939247  | 7.243600  |
| C  | 8.398554  | 14.997660 | 8.558803  |
| C  | 9.341761  | 14.628451 | 7.557912  |

|    |           |           |           |
|----|-----------|-----------|-----------|
| Si | 10.794051 | 15.869837 | 7.366412  |
| C  | 10.167517 | 17.493169 | 6.617252  |
| C  | 6.369828  | 13.322693 | 8.859486  |
| C  | 9.324474  | 9.812051  | 10.063603 |
| C  | 8.648657  | 10.464134 | 11.127594 |
| Si | 7.526185  | 11.957399 | 13.262746 |
| C  | 8.464210  | 11.831771 | 14.908050 |
| C  | 6.143143  | 10.657546 | 13.250199 |
| C  | 6.716786  | 13.674821 | 13.158495 |
| C  | 3.587406  | 11.677399 | 9.299251  |
| C  | 4.178916  | 10.542022 | 6.497446  |
| C  | 11.715379 | 7.266069  | 8.963685  |
| C  | 11.954383 | 9.223883  | 6.592409  |
| C  | 12.144396 | 15.142856 | 6.253045  |
| C  | 11.552935 | 16.278210 | 9.054873  |
| H  | 6.946798  | 17.908575 | 5.776853  |
| H  | 7.970704  | 16.916401 | 4.141758  |
| H  | 6.243083  | 13.232161 | 3.155064  |
| H  | 4.457305  | 12.821613 | 4.383545  |
| H  | 3.386115  | 13.854379 | 6.050948  |
| H  | 3.656217  | 15.731857 | 7.184583  |
| H  | 4.212502  | 16.758345 | 9.514371  |
| H  | 2.784578  | 17.295612 | 8.611244  |
| H  | 3.636895  | 18.424004 | 9.663966  |
| H  | 7.160951  | 19.308104 | 7.558894  |
| H  | 7.037467  | 18.110736 | 8.859592  |
| H  | 6.235448  | 19.681897 | 9.012451  |
| H  | 3.781811  | 20.402243 | 7.241341  |
| H  | 3.079467  | 19.186495 | 6.158246  |
| H  | 4.636314  | 19.921924 | 5.764661  |
| H  | 5.509360  | 13.340049 | 9.520928  |
| H  | 7.079109  | 10.896027 | 6.483924  |

|   |           |           |           |
|---|-----------|-----------|-----------|
| H | 8.942654  | 11.730351 | 5.679080  |
| H | 3.408949  | 9.772031  | 6.618814  |
| H | 4.919542  | 10.156387 | 5.789968  |
| H | 3.709874  | 11.421467 | 6.049655  |
| H | 4.745345  | 8.604760  | 9.024816  |
| H | 5.989003  | 9.485953  | 9.929985  |
| H | 6.339866  | 8.878310  | 8.306763  |
| H | 3.209961  | 12.630980 | 8.916545  |
| H | 3.928698  | 11.831076 | 10.327808 |
| H | 2.744186  | 10.979113 | 9.338028  |
| H | 8.785079  | 8.911601  | 9.775541  |
| H | 7.761170  | 9.903774  | 11.410635 |
| H | 9.488773  | 13.588026 | 12.397314 |
| H | 11.274541 | 13.998583 | 11.168826 |
| H | 12.345732 | 12.965823 | 9.501419  |
| H | 12.075637 | 11.088337 | 8.367789  |
| H | 11.519399 | 10.061849 | 6.038028  |
| H | 12.947315 | 9.524597  | 6.941176  |
| H | 12.095026 | 8.396196  | 5.888440  |
| H | 8.570946  | 7.512065  | 7.993459  |
| H | 8.694440  | 8.709433  | 6.692762  |
| H | 9.496474  | 7.138279  | 6.539917  |
| H | 11.950092 | 6.417955  | 8.311058  |
| H | 12.652412 | 7.633707  | 9.394163  |
| H | 11.095566 | 6.898264  | 9.787728  |
| H | 10.222490 | 13.480112 | 6.031455  |
| H | 8.652744  | 15.924136 | 9.068461  |
| H | 6.789201  | 15.089811 | 9.873308  |
| H | 12.322872 | 17.048226 | 8.933482  |
| H | 10.812317 | 16.663822 | 9.762372  |
| H | 12.022019 | 15.398781 | 9.502651  |
| H | 10.986364 | 18.215456 | 6.527510  |

|   |           |           |           |
|---|-----------|-----------|-----------|
| H | 9.742700  | 17.334220 | 5.622392  |
| H | 9.391879  | 17.941855 | 7.245625  |
| H | 12.521880 | 14.189284 | 6.635735  |
| H | 11.803077 | 14.989176 | 5.224498  |
| H | 12.987594 | 15.841167 | 6.214244  |
| H | 6.058528  | 13.837480 | 14.019142 |
| H | 7.455321  | 14.482719 | 13.152303 |
| H | 6.111972  | 13.765775 | 12.250491 |
| H | 5.461035  | 10.852610 | 14.085092 |
| H | 5.553675  | 10.691094 | 12.328420 |
| H | 6.527937  | 9.640288  | 13.373570 |
| H | 7.797879  | 12.006860 | 15.759887 |
| H | 8.912082  | 10.839591 | 15.023340 |
| H | 9.273781  | 12.567006 | 14.955152 |
| H | 7.933996  | 14.813326 | -0.207500 |
| H | 6.458085  | 14.253193 | 0.597228  |
| H | 6.819803  | 15.980604 | 0.529048  |
| H | 10.270848 | 15.967543 | 1.467307  |
| H | 9.203957  | 17.179875 | 2.178828  |
| H | 10.178205 | 16.129055 | 3.223979  |
| H | 9.673322  | 12.982679 | 1.533245  |
| H | 9.619870  | 13.054378 | 3.301896  |
| H | 8.276517  | 12.337454 | 2.400074  |

**Ho<sub>2</sub>(1,4-COT)<sub>3</sub>:**

|    |          |           |          |
|----|----------|-----------|----------|
| C  | 5.669784 | 18.744124 | 9.082718 |
| Si | 6.421306 | 18.767166 | 7.338626 |
| C  | 8.294339 | 19.039136 | 7.515532 |
| C  | 5.688975 | 20.231717 | 6.378682 |
| C  | 6.023665 | 17.167272 | 6.382864 |
| C  | 6.849076 | 16.975884 | 5.236806 |
| C  | 6.968151 | 16.028842 | 4.187659 |

|    |           |           |           |
|----|-----------|-----------|-----------|
| Ho | 6.775275  | 14.678232 | 6.380370  |
| C  | 9.438299  | 14.002273 | 6.774978  |
| C  | 8.868501  | 12.735049 | 6.480104  |
| C  | 7.738593  | 11.953300 | 6.867521  |
| C  | 6.607061  | 12.068122 | 7.740772  |
| Si | 5.293332  | 10.683587 | 7.536553  |
| C  | 5.856569  | 9.065013  | 8.350723  |
| C  | 4.925283  | 16.419290 | 6.890536  |
| C  | 4.227301  | 15.251663 | 6.503250  |
| C  | 4.342725  | 14.308617 | 5.457265  |
| C  | 5.211782  | 14.125540 | 4.358185  |
| C  | 6.318487  | 14.824722 | 3.797500  |
| Si | 6.936850  | 14.014885 | 2.186014  |
| C  | 5.539927  | 14.104199 | 0.903501  |
| C  | 8.449234  | 14.913954 | 1.474969  |
| C  | 7.391848  | 12.189876 | 2.458474  |
| C  | 6.331981  | 13.054235 | 8.736223  |
| Ho | 8.595244  | 11.931785 | 9.504960  |
| C  | 8.367643  | 10.066286 | 11.214171 |
| C  | 8.227314  | 11.267094 | 11.970096 |
| C  | 9.005622  | 12.459462 | 11.997333 |
| C  | 10.143449 | 12.948870 | 11.315361 |
| C  | 10.995188 | 12.462357 | 10.296066 |
| C  | 11.095029 | 11.262659 | 9.550026  |
| C  | 10.389853 | 10.029290 | 9.502614  |
| Si | 11.111415 | 8.706875  | 8.331819  |
| C  | 9.763744  | 7.928419  | 7.240675  |
| C  | 7.009343  | 14.214403 | 9.205418  |
| C  | 8.129055  | 14.990468 | 8.804240  |
| C  | 9.090613  | 14.946614 | 7.774465  |
| C  | 9.250107  | 9.563637  | 10.220732 |
| Si | 6.804157  | 11.285303 | 13.241555 |

|   |           |           |           |
|---|-----------|-----------|-----------|
| C | 7.556244  | 11.116443 | 14.975014 |
| C | 5.588056  | 9.855094  | 12.961635 |
| C | 5.821458  | 12.909901 | 13.157714 |
| C | 3.656491  | 11.223709 | 8.325668  |
| C | 5.012161  | 10.327364 | 5.696831  |
| C | 11.889210 | 7.343141  | 9.397220  |
| C | 12.439593 | 9.432447  | 7.188550  |
| H | 7.662959  | 17.696619 | 5.181582  |
| H | 7.835686  | 16.251599 | 3.571823  |
| H | 4.995082  | 13.189729 | 3.844354  |
| H | 3.648617  | 13.479599 | 5.575820  |
| H | 3.475421  | 14.963203 | 7.234483  |
| H | 4.561689  | 16.789602 | 7.845521  |
| H | 6.007026  | 17.878058 | 9.661274  |
| H | 4.575419  | 18.736435 | 9.064302  |
| H | 5.979680  | 19.646335 | 9.621585  |
| H | 8.801428  | 19.110883 | 6.548443  |
| H | 8.760533  | 18.226428 | 8.081599  |
| H | 8.484230  | 19.974980 | 8.052929  |
| H | 5.896687  | 21.183388 | 6.880120  |
| H | 4.603554  | 20.126377 | 6.282813  |
| H | 6.106382  | 20.282388 | 5.367925  |
| H | 5.402210  | 12.893191 | 9.273069  |
| H | 7.695484  | 11.049421 | 6.263283  |
| H | 9.408027  | 12.213142 | 5.694065  |
| H | 4.217225  | 9.582657  | 5.580035  |
| H | 5.908709  | 9.927256  | 5.213444  |
| H | 4.715122  | 11.231862 | 5.159721  |
| H | 5.102367  | 8.285883  | 8.191730  |
| H | 6.000476  | 9.177527  | 9.429512  |
| H | 6.797062  | 8.710051  | 7.918600  |
| H | 3.309549  | 12.180284 | 7.923383  |

|    |           |           |           |
|----|-----------|-----------|-----------|
| H  | 3.724399  | 11.314485 | 9.414509  |
| H  | 2.889089  | 10.471784 | 8.111650  |
| H  | 8.902475  | 8.592307  | 9.871790  |
| H  | 7.556280  | 9.365056  | 11.390152 |
| H  | 8.584920  | 13.228413 | 12.642698 |
| H  | 10.355723 | 13.985902 | 11.564002 |
| H  | 11.697760 | 13.217923 | 9.954544  |
| H  | 11.869194 | 11.340805 | 8.791723  |
| H  | 12.042182 | 10.239110 | 6.564239  |
| H  | 13.300491 | 9.819423  | 7.742574  |
| H  | 12.806765 | 8.646053  | 6.520056  |
| H  | 8.967385  | 7.462674  | 7.829783  |
| H  | 9.307825  | 8.677330  | 6.584674  |
| H  | 10.198164 | 7.147959  | 6.606072  |
| H  | 12.306208 | 6.541717  | 8.777570  |
| H  | 12.694482 | 7.749054  | 10.017703 |
| H  | 11.146470 | 6.900062  | 10.068237 |
| Si | 11.030187 | 14.465721 | 5.822787  |
| H  | 8.231766  | 15.876473 | 9.425243  |
| H  | 6.486453  | 14.667857 | 10.042582 |
| H  | 5.044780  | 12.917580 | 13.930556 |
| H  | 6.451792  | 13.789752 | 13.319638 |
| H  | 5.327837  | 13.023479 | 12.187033 |
| H  | 4.786569  | 9.917978  | 13.706069 |
| H  | 5.121108  | 9.895736  | 11.972120 |
| H  | 6.061347  | 8.874853  | 13.076640 |
| H  | 6.781056  | 11.142513 | 15.748660 |
| H  | 8.100352  | 10.171257 | 15.069540 |
| H  | 8.263945  | 11.926642 | 15.177314 |
| H  | 5.836581  | 13.628143 | -0.037631 |
| H  | 4.634994  | 13.604519 | 1.263332  |
| H  | 5.279092  | 15.145961 | 0.691138  |



|   |           |           |          |
|---|-----------|-----------|----------|
| H | 8.759648  | 14.415606 | 0.549870 |
| H | 8.222799  | 15.955569 | 1.225820 |
| H | 9.305768  | 14.904905 | 2.156084 |
| H | 7.705863  | 11.727932 | 1.515830 |
| H | 8.215545  | 12.094712 | 3.173260 |
| H | 6.546956  | 11.611185 | 2.844603 |
| H | 9.719102  | 15.834823 | 7.783790 |
| C | 11.350432 | 13.267646 | 4.388055 |
| C | 10.915798 | 16.230005 | 5.136674 |
| C | 12.511969 | 14.392093 | 7.007796 |
| H | 12.249584 | 13.588255 | 3.850412 |
| H | 11.527819 | 12.243557 | 4.731886 |
| H | 10.525466 | 13.248819 | 3.669463 |
| H | 13.432310 | 14.695131 | 6.496329 |
| H | 12.371292 | 15.059242 | 7.864385 |
| H | 12.658990 | 13.377709 | 7.391145 |
| H | 11.848251 | 16.495797 | 4.626511 |
| H | 10.096783 | 16.321677 | 4.417565 |
| H | 10.751144 | 16.968636 | 5.927151 |

**Ho<sub>2</sub>(1,5-COT)(1,4-COT)<sub>2</sub>:**

|    |          |           |          |
|----|----------|-----------|----------|
| C  | 3.820212 | 17.577663 | 8.994600 |
| Si | 4.935486 | 18.152070 | 7.568924 |
| C  | 4.034101 | 19.518098 | 6.607487 |
| C  | 5.327816 | 16.728434 | 6.363443 |
| C  | 4.422396 | 15.633419 | 6.412695 |
| C  | 4.253291 | 14.425231 | 5.696705 |
| C  | 4.929048 | 13.771995 | 4.641003 |
| C  | 6.065937 | 14.047658 | 3.848771 |
| C  | 6.999742 | 15.115750 | 3.737360 |
| Si | 8.236954 | 14.850038 | 2.312341 |
| C  | 9.607029 | 16.163587 | 2.307984 |

|    |           |           |           |
|----|-----------|-----------|-----------|
| C  | 6.515413  | 18.887147 | 8.327191  |
| Ho | 6.782750  | 14.562705 | 6.291753  |
| C  | 6.373469  | 13.318078 | 8.861711  |
| C  | 7.185257  | 14.466422 | 9.071863  |
| C  | 8.383405  | 15.013369 | 8.537706  |
| C  | 9.329447  | 14.643452 | 7.540798  |
| C  | 9.358403  | 13.502102 | 6.690646  |
| Ho | 8.949111  | 12.257468 | 9.260597  |
| C  | 11.478571 | 12.394934 | 9.855647  |
| C  | 11.309457 | 11.186735 | 9.139677  |
| C  | 10.404026 | 10.091729 | 9.188944  |
| C  | 9.289127  | 9.827665  | 10.036608 |
| C  | 8.615993  | 10.477340 | 11.103996 |
| C  | 8.732114  | 11.704468 | 11.815002 |
| Si | 7.494911  | 11.970209 | 13.240021 |
| C  | 6.124817  | 10.656681 | 13.244396 |
| C  | 6.442713  | 16.992522 | 5.515784  |
| C  | 7.115854  | 16.342869 | 4.448386  |
| C  | 6.402422  | 12.176732 | 8.011557  |
| C  | 7.348459  | 11.806817 | 7.014644  |
| C  | 8.546611  | 12.353761 | 6.480491  |
| C  | 9.062449  | 13.140564 | 2.418378  |
| C  | 7.284646  | 14.959033 | 0.674202  |
| Si | 4.948829  | 10.936343 | 8.203983  |
| C  | 3.607052  | 11.659311 | 9.330257  |
| C  | 4.178157  | 10.539595 | 6.517639  |
| C  | 5.568429  | 9.302803  | 8.936215  |
| C  | 9.665924  | 12.772554 | 11.703572 |
| C  | 10.802817 | 13.048195 | 10.911336 |
| Si | 10.796345 | 8.668073  | 7.983483  |
| C  | 11.697721 | 7.302052  | 8.944937  |
| C  | 11.911621 | 9.242450  | 6.557796  |

|    |           |           |           |
|----|-----------|-----------|-----------|
| C  | 9.216410  | 7.932999  | 7.225228  |
| C  | 6.669437  | 13.679694 | 13.133974 |
| C  | 8.447224  | 11.861217 | 14.878158 |
| Si | 10.783041 | 15.883841 | 7.348376  |
| C  | 12.124792 | 15.160902 | 6.222052  |
| C  | 11.553754 | 16.280543 | 9.034713  |
| C  | 10.163428 | 17.517404 | 6.616204  |
| H  | 6.978696  | 17.896208 | 5.799580  |
| H  | 7.997654  | 16.908653 | 4.158738  |
| H  | 6.303916  | 13.200936 | 3.206734  |
| H  | 4.534256  | 12.776986 | 4.453895  |
| H  | 3.463514  | 13.809160 | 6.120457  |
| H  | 3.723600  | 15.693109 | 7.242962  |
| H  | 4.262140  | 16.746437 | 9.553506  |
| H  | 2.828838  | 17.267527 | 8.649647  |
| H  | 3.674979  | 18.408723 | 9.693645  |
| H  | 7.184502  | 19.310514 | 7.571692  |
| H  | 7.071843  | 18.130148 | 8.889042  |
| H  | 6.254722  | 19.695343 | 9.019538  |
| H  | 3.792366  | 20.369122 | 7.253733  |
| H  | 3.099829  | 19.137304 | 6.182512  |
| H  | 4.648086  | 19.885443 | 5.778876  |
| H  | 5.513711  | 13.336458 | 9.523838  |
| H  | 7.105512  | 10.871388 | 6.516186  |
| H  | 8.957191  | 11.718718 | 5.700915  |
| H  | 3.418263  | 9.759522  | 6.638424  |
| H  | 4.916718  | 10.169607 | 5.799687  |
| H  | 3.694060  | 11.417214 | 6.082453  |
| H  | 4.745352  | 8.584018  | 9.015215  |
| H  | 5.991033  | 9.448119  | 9.933964  |
| H  | 6.342882  | 8.857038  | 8.304419  |
| H  | 3.224977  | 12.613639 | 8.954076  |

|   |           |           |           |
|---|-----------|-----------|-----------|
| H | 3.956857  | 11.810278 | 10.356347 |
| H | 2.764962  | 10.959934 | 9.373827  |
| H | 8.753136  | 8.923978  | 9.752829  |
| H | 7.734190  | 9.911567  | 11.393655 |
| H | 9.427949  | 13.619290 | 12.345593 |
| H | 11.197615 | 14.043206 | 11.098423 |
| H | 12.268353 | 13.010991 | 9.431884  |
| H | 12.008253 | 11.127027 | 8.309411  |
| H | 11.469692 | 10.073659 | 5.998868  |
| H | 12.902992 | 9.552599  | 6.902744  |
| H | 12.056861 | 8.411371  | 5.858774  |
| H | 8.547312  | 7.509662  | 7.980734  |
| H | 8.659995  | 8.689992  | 6.663354  |
| H | 9.477093  | 7.124782  | 6.532903  |
| H | 11.939448 | 6.451017  | 8.298703  |
| H | 12.631996 | 7.682844  | 9.369906  |
| H | 11.083735 | 6.934723  | 9.773554  |
| H | 10.218167 | 13.483718 | 6.028525  |
| H | 8.626348  | 15.948804 | 9.036158  |
| H | 6.774677  | 15.101466 | 9.851437  |
| H | 12.313631 | 17.060633 | 8.913935  |
| H | 10.815205 | 16.650493 | 9.752698  |
| H | 12.037878 | 15.402917 | 9.469857  |
| H | 10.986506 | 18.236188 | 6.537206  |
| H | 9.740799  | 17.372117 | 5.618462  |
| H | 9.388991  | 17.963155 | 7.248032  |
| H | 12.506881 | 14.206567 | 6.598203  |
| H | 11.774963 | 15.009956 | 5.195968  |
| H | 12.966880 | 15.860283 | 6.178477  |
| H | 6.007541  | 13.835756 | 13.993040 |
| H | 7.400262  | 14.494579 | 13.130205 |
| H | 6.066414  | 13.765513 | 12.224356 |

|   |           |           |           |
|---|-----------|-----------|-----------|
| H | 5.447095  | 10.849173 | 14.083455 |
| H | 5.528082  | 10.679145 | 12.327010 |
| H | 6.520927  | 9.644052  | 13.370202 |
| H | 7.786967  | 12.037002 | 15.734553 |
| H | 8.903098  | 10.872965 | 14.995751 |
| H | 9.251934  | 12.602438 | 14.913528 |
| H | 7.944910  | 14.783265 | -0.182191 |
| H | 6.479946  | 14.217801 | 0.638821  |
| H | 6.828760  | 15.947280 | 0.556615  |
| H | 10.284758 | 15.971111 | 1.468928  |
| H | 9.210904  | 17.176211 | 2.182185  |
| H | 10.203759 | 16.141124 | 3.225374  |
| H | 9.724359  | 12.984522 | 1.559319  |
| H | 9.665461  | 13.054741 | 3.328003  |
| H | 8.331636  | 12.325668 | 2.422125  |

**Tm<sub>2</sub>(1,4-COT)<sub>3</sub>:**

|    |          |           |          |
|----|----------|-----------|----------|
| C  | 6.044716 | 19.269986 | 9.054023 |
| Si | 6.790724 | 19.088382 | 7.319246 |
| C  | 6.177505 | 17.499920 | 6.454866 |
| C  | 5.113974 | 16.810982 | 7.104631 |
| C  | 4.351434 | 15.646172 | 6.848270 |
| C  | 4.347141 | 14.642703 | 5.851979 |
| C  | 5.088620 | 14.391249 | 4.673140 |
| C  | 6.116664 | 15.058972 | 3.945733 |
| Si | 6.508559 | 14.202450 | 2.284336 |
| C  | 6.791561 | 12.339240 | 2.514166 |
| C  | 8.683278 | 19.093813 | 7.488936 |
| C  | 6.268342 | 20.574964 | 6.262753 |
| C  | 6.857850 | 17.248949 | 5.225509 |
| Tm | 6.813843 | 15.048612 | 6.452251 |
| C  | 8.246908 | 14.742419 | 8.596089 |

|    |           |           |           |
|----|-----------|-----------|-----------|
| C  | 9.157864  | 14.692864 | 7.515032  |
| C  | 9.431392  | 13.738307 | 6.495637  |
| Si | 10.941611 | 14.217442 | 5.427100  |
| C  | 12.510677 | 14.110963 | 6.493222  |
| C  | 6.821842  | 16.268191 | 4.200652  |
| C  | 8.980617  | 12.402653 | 6.353879  |
| C  | 7.979961  | 11.562276 | 6.895262  |
| Tm | 8.538455  | 11.863091 | 9.585429  |
| C  | 10.489801 | 10.163677 | 9.803069  |
| C  | 9.331957  | 9.582150  | 10.395082 |
| C  | 8.287039  | 9.997421  | 11.262363 |
| C  | 7.938855  | 11.184551 | 11.972604 |
| Si | 6.383069  | 11.077107 | 13.072299 |
| C  | 5.183250  | 12.507326 | 12.714871 |
| C  | 6.790720  | 11.735526 | 7.667283  |
| C  | 6.397132  | 12.849064 | 8.460896  |
| C  | 7.053068  | 14.031079 | 8.931547  |
| Si | 5.513055  | 10.327591 | 7.468521  |
| C  | 4.875387  | 10.299548 | 5.682456  |
| C  | 6.289625  | 8.637618  | 7.841791  |
| C  | 4.036855  | 10.588424 | 8.632102  |
| C  | 5.016929  | 14.449782 | 1.137175  |
| C  | 8.038306  | 14.954687 | 1.452735  |
| C  | 8.584494  | 12.451364 | 12.072023 |
| C  | 9.740337  | 13.052617 | 11.522881 |
| C  | 10.744943 | 12.655465 | 10.610034 |
| C  | 11.048756 | 11.468455 | 9.898314  |
| Si | 11.480496 | 8.916974  | 8.750067  |
| C  | 12.895609 | 9.764218  | 7.813557  |
| C  | 10.386614 | 8.034293  | 7.472497  |
| C  | 12.209078 | 7.616469  | 9.924793  |
| C  | 6.932474  | 11.186278 | 14.885160 |

|   |           |           |           |
|---|-----------|-----------|-----------|
| C | 5.457707  | 9.440861  | 12.816055 |
| C | 11.137784 | 13.058362 | 3.937616  |
| C | 10.791800 | 16.000947 | 4.795657  |
| H | 7.678724  | 17.943129 | 5.052459  |
| H | 7.606891  | 16.454635 | 3.472585  |
| H | 4.818831  | 13.428149 | 4.243954  |
| H | 3.672545  | 13.825823 | 6.096716  |
| H | 3.682247  | 15.407800 | 7.671622  |
| H | 4.866193  | 17.230999 | 8.075590  |
| H | 6.297609  | 18.425054 | 9.703000  |
| H | 4.954899  | 19.367906 | 9.028731  |
| H | 6.442923  | 20.176657 | 9.522752  |
| H | 9.187587  | 18.995808 | 6.522682  |
| H | 9.022914  | 18.274239 | 8.130876  |
| H | 9.019835  | 20.033676 | 7.940574  |
| H | 6.612427  | 21.516557 | 6.704317  |
| H | 5.178459  | 20.619646 | 6.170965  |
| H | 6.682906  | 20.504578 | 5.252118  |
| H | 5.420166  | 12.740899 | 8.924460  |
| H | 8.062842  | 10.555767 | 6.485780  |
| H | 9.559387  | 11.850545 | 5.614587  |
| H | 4.169677  | 9.474669  | 5.535031  |
| H | 5.697334  | 10.172256 | 4.971475  |
| H | 4.360598  | 11.233343 | 5.436662  |
| H | 5.556685  | 7.843646  | 7.659926  |
| H | 6.611258  | 8.567221  | 8.885420  |
| H | 7.157582  | 8.435525  | 7.207246  |
| H | 3.481856  | 11.502945 | 8.399109  |
| H | 4.338986  | 10.630430 | 9.683333  |
| H | 3.341050  | 9.749315  | 8.522807  |
| H | 9.133968  | 8.576007  | 10.027865 |
| H | 7.531991  | 9.220370  | 11.350604 |

|   |           |           |           |
|---|-----------|-----------|-----------|
| H | 8.014277  | 13.175076 | 12.652934 |
| H | 9.816090  | 14.106341 | 11.780554 |
| H | 11.398804 | 13.478599 | 10.333446 |
| H | 11.890904 | 11.622493 | 9.229938  |
| H | 12.522638 | 10.521832 | 7.116971  |
| H | 13.615542 | 10.239053 | 8.487344  |
| H | 13.439130 | 9.014840  | 7.227649  |
| H | 9.532855  | 7.526733  | 7.931265  |
| H | 10.002800 | 8.746449  | 6.735180  |
| H | 10.971793 | 7.277817  | 6.937771  |
| H | 12.773633 | 6.856109  | 9.374086  |
| H | 12.883292 | 8.083199  | 10.649991 |
| H | 11.418301 | 7.109422  | 10.486729 |
| H | 8.407456  | 15.593008 | 9.254107  |
| H | 6.495299  | 14.517994 | 9.727816  |
| H | 4.333032  | 12.470729 | 13.404951 |
| H | 5.660162  | 13.485428 | 12.833796 |
| H | 4.789264  | 12.446923 | 11.695126 |
| H | 4.565127  | 9.429502  | 13.451286 |
| H | 5.126742  | 9.304588  | 11.781572 |
| H | 6.068861  | 8.576636  | 13.095013 |
| H | 6.072315  | 11.144006 | 15.562252 |
| H | 7.603878  | 10.358589 | 15.134991 |
| H | 7.470640  | 12.118953 | 15.081457 |
| H | 5.179785  | 13.968076 | 0.166751  |
| H | 4.108593  | 14.025387 | 1.576646  |
| H | 4.833929  | 15.514763 | 0.962249  |
| H | 8.241360  | 14.413505 | 0.521982  |
| H | 7.888910  | 16.007035 | 1.191067  |
| H | 8.932693  | 14.881382 | 2.078943  |
| H | 7.054090  | 11.879378 | 1.554773  |
| H | 7.603531  | 12.141542 | 3.220775  |



|   |           |           |          |
|---|-----------|-----------|----------|
| H | 5.895802  | 11.831444 | 2.884566 |
| H | 9.820641  | 15.557933 | 7.516264 |
| H | 11.947403 | 13.425218 | 3.297073 |
| H | 11.398434 | 12.037831 | 4.235746 |
| H | 10.227823 | 13.012213 | 3.331880 |
| H | 13.396626 | 14.401876 | 5.918025 |
| H | 12.442513 | 14.774555 | 7.361419 |
| H | 12.668119 | 13.093010 | 6.862735 |
| H | 11.672126 | 16.263970 | 4.198771 |
| H | 9.905775  | 16.126678 | 4.166669 |
| H | 10.725144 | 16.722917 | 5.615678 |

**Tm<sub>2</sub>(1,5-COT)(1,4-COT)<sub>2</sub>:**

|    |          |           |          |
|----|----------|-----------|----------|
| C  | 4.123214 | 17.899850 | 9.161303 |
| Si | 5.340956 | 18.432667 | 7.807649 |
| C  | 6.988575 | 18.880692 | 8.642499 |
| C  | 4.658209 | 19.975590 | 6.939290 |
| C  | 5.576620 | 17.065359 | 6.498574 |
| C  | 6.591879 | 17.389150 | 5.548153 |
| C  | 7.139701 | 16.806703 | 4.373363 |
| Tm | 7.050966 | 14.996534 | 6.161990 |
| C  | 9.256852 | 13.250332 | 6.119894 |
| C  | 8.632004 | 11.992968 | 6.246365 |
| C  | 7.663373 | 11.387797 | 7.072450 |
| C  | 6.642403 | 11.874075 | 7.940992 |
| Si | 5.149924 | 10.692595 | 8.112918 |
| C  | 5.708653 | 8.976361  | 8.695627 |
| C  | 4.705454 | 15.946601 | 6.601971 |
| C  | 4.513180 | 14.738375 | 5.890678 |
| C  | 5.104178 | 14.123687 | 4.761727 |
| C  | 6.114605 | 14.480671 | 3.837481 |
| C  | 6.965475 | 15.603957 | 3.633241 |

|    |           |           |           |
|----|-----------|-----------|-----------|
| Si | 7.956823  | 15.469082 | 2.007493  |
| C  | 6.726156  | 15.620402 | 0.570627  |
| C  | 9.235636  | 16.861174 | 1.837442  |
| C  | 8.850192  | 13.799082 | 1.862430  |
| C  | 7.453429  | 14.257747 | 8.724094  |
| Tm | 8.585372  | 11.986639 | 9.647582  |
| C  | 8.147767  | 11.428890 | 12.101789 |
| C  | 8.886450  | 12.648144 | 12.090935 |
| C  | 10.042482 | 13.128176 | 11.434088 |
| C  | 10.934214 | 12.613626 | 10.465235 |
| C  | 11.063737 | 11.397284 | 9.750813  |
| C  | 10.386948 | 10.145210 | 9.731242  |
| Si | 11.162249 | 8.828910  | 8.586015  |
| C  | 9.836793  | 7.809147  | 7.686034  |
| C  | 8.696909  | 14.695211 | 8.155509  |
| C  | 9.430583  | 14.372497 | 6.980158  |
| Si | 10.933505 | 15.506212 | 6.639356  |
| C  | 10.430800 | 17.335629 | 6.688085  |
| C  | 6.545894  | 13.160209 | 8.540068  |
| C  | 9.260521  | 9.671410  | 10.462975 |
| C  | 8.349606  | 10.192611 | 11.419003 |
| Si | 6.716870  | 11.461672 | 13.363961 |
| C  | 7.471754  | 11.459687 | 15.104798 |
| C  | 5.586753  | 9.947357  | 13.194772 |
| C  | 5.657452  | 13.027817 | 13.167382 |
| C  | 3.879736  | 11.378270 | 9.342972  |
| C  | 4.307396  | 10.495319 | 6.424066  |
| C  | 12.201975 | 7.660384  | 9.661119  |
| C  | 12.281814 | 9.622409  | 7.274430  |
| C  | 11.708237 | 15.124613 | 4.953457  |
| C  | 12.255901 | 15.234760 | 7.973223  |
| H  | 7.133650  | 18.298687 | 5.804330  |

|   |           |           |           |
|---|-----------|-----------|-----------|
| H | 7.958392  | 17.413941 | 3.994955  |
| H | 6.311653  | 13.663331 | 3.146475  |
| H | 4.740770  | 13.111991 | 4.603198  |
| H | 3.804397  | 14.080966 | 6.388120  |
| H | 4.088010  | 15.970813 | 7.495823  |
| H | 4.467502  | 17.010461 | 9.699217  |
| H | 3.124552  | 17.694374 | 8.763196  |
| H | 4.024450  | 18.709650 | 9.892545  |
| H | 7.754476  | 19.175893 | 7.918708  |
| H | 7.378260  | 18.034500 | 9.218362  |
| H | 6.847971  | 19.718722 | 9.334222  |
| H | 4.519839  | 20.800199 | 7.647128  |
| H | 3.691262  | 19.760120 | 6.473553  |
| H | 5.335607  | 20.318474 | 6.150765  |
| H | 5.632785  | 13.318910 | 9.108963  |
| H | 7.555146  | 10.328487 | 6.840960  |
| H | 8.994971  | 11.296508 | 5.490468  |
| H | 3.506552  | 9.749418  | 6.474937  |
| H | 5.021796  | 10.171057 | 5.660890  |
| H | 3.865281  | 11.439496 | 6.091734  |
| H | 4.853448  | 8.291852  | 8.720235  |
| H | 6.135952  | 9.022770  | 9.701583  |
| H | 6.461552  | 8.540075  | 8.032124  |
| H | 3.456102  | 12.330743 | 9.008205  |
| H | 4.306129  | 11.525405 | 10.339970 |
| H | 3.049935  | 10.669678 | 9.440289  |
| H | 8.944815  | 8.678101  | 10.150157 |
| H | 7.557731  | 9.475255  | 11.618304 |
| H | 8.425200  | 13.432847 | 12.688084 |
| H | 10.232796 | 14.176878 | 11.650505 |
| H | 11.638286 | 13.364642 | 10.120229 |
| H | 11.848379 | 11.470172 | 9.002728  |

|   |           |           |           |
|---|-----------|-----------|-----------|
| H | 11.743271 | 10.366905 | 6.679551  |
| H | 13.161525 | 10.103893 | 7.713128  |
| H | 12.644232 | 8.845866  | 6.591583  |
| H | 9.171556  | 7.278547  | 8.374133  |
| H | 9.222819  | 8.446557  | 7.042285  |
| H | 10.317994 | 7.055637  | 7.052532  |
| H | 12.678155 | 6.879275  | 9.058411  |
| H | 12.988503 | 8.214335  | 10.183514 |
| H | 11.581298 | 7.172352  | 10.419523 |
| H | 9.889662  | 13.289303 | 5.236708  |
| H | 9.078601  | 15.561118 | 8.695069  |
| H | 7.096963  | 14.946165 | 9.488383  |
| H | 13.124148 | 15.876334 | 7.785990  |
| H | 11.873061 | 15.475948 | 8.969801  |
| H | 12.599131 | 14.195760 | 7.981308  |
| H | 11.311492 | 17.974275 | 6.557952  |
| H | 9.721488  | 17.570858 | 5.888427  |
| H | 9.964647  | 17.608016 | 7.640235  |
| H | 12.122997 | 14.112655 | 4.912394  |
| H | 10.991730 | 15.234915 | 4.134283  |
| H | 12.531142 | 15.824284 | 4.770301  |
| H | 4.873162  | 13.047784 | 13.932241 |
| H | 6.246241  | 13.943685 | 13.280092 |
| H | 5.169741  | 13.061385 | 12.187804 |
| H | 4.772697  | 10.026232 | 13.923831 |
| H | 5.133008  | 9.871285  | 12.201783 |
| H | 6.117862  | 9.012517  | 13.400259 |
| H | 6.692988  | 11.495205 | 15.874508 |
| H | 8.068796  | 10.556390 | 15.265742 |
| H | 8.130447  | 12.321747 | 15.249969 |
| H | 7.235652  | 15.543865 | -0.396291 |
| H | 5.965843  | 14.834191 | 0.614894  |

|   |          |           |          |
|---|----------|-----------|----------|
| H | 6.207681 | 16.583901 | 0.606814 |
| H | 9.782719 | 16.728359 | 0.897481 |
| H | 8.761814 | 17.847368 | 1.802075 |
| H | 9.971750 | 16.865226 | 2.647342 |
| H | 9.341632 | 13.721203 | 0.886189 |
| H | 9.617136 | 13.687383 | 2.634743 |
| H | 8.161751 | 12.952879 | 1.951448 |

**Lu<sub>2</sub>(1,4-COT)<sub>3</sub>:**

|   |          |           |          |
|---|----------|-----------|----------|
| C | 5.475596 | 1.410550  | 4.313876 |
| C | 6.795614 | 1.022961  | 4.687510 |
| H | 7.129474 | 0.129327  | 4.167111 |
| C | 7.836803 | 1.539423  | 5.503418 |
| H | 8.723540 | 0.914094  | 5.412545 |
| C | 8.061754 | 2.697517  | 6.301765 |
| C | 7.238470 | 3.819079  | 6.590784 |
| H | 7.752672 | 4.596846  | 7.147577 |
| C | 5.919674 | 4.219542  | 6.263353 |
| H | 5.692817 | 5.216825  | 6.630100 |
| C | 4.860493 | 3.675914  | 5.499472 |
| H | 4.013090 | 4.353124  | 5.435512 |
| C | 4.682827 | 2.531429  | 4.689107 |
| H | 3.725038 | 2.569583  | 4.172743 |
| C | 3.170975 | -0.633358 | 4.228265 |
| H | 2.584803 | -1.334783 | 3.624519 |
| H | 2.484260 | 0.110949  | 4.643804 |
| H | 3.606273 | -1.186556 | 5.066548 |
| C | 5.670344 | -1.163425 | 2.505632 |
| H | 6.479235 | -0.756506 | 1.890630 |
| H | 5.081908 | -1.836214 | 1.871836 |
| H | 6.116077 | -1.771958 | 3.298863 |
| C | 3.720008 | 1.083066  | 1.724390 |

|   |           |          |           |
|---|-----------|----------|-----------|
| H | 4.470199  | 1.558293 | 1.084071  |
| H | 3.015358  | 1.856380 | 2.045361  |
| H | 3.161585  | 0.367260 | 1.110896  |
| C | 10.141688 | 4.345886 | 7.993240  |
| H | 11.137947 | 4.303759 | 8.447171  |
| H | 9.428284  | 4.573982 | 8.791409  |
| H | 10.136681 | 5.177407 | 7.281258  |
| C | 9.751309  | 1.321319 | 8.473056  |
| H | 10.713010 | 1.259183 | 8.994034  |
| H | 9.545305  | 0.343106 | 8.026809  |
| H | 8.972359  | 1.515885 | 9.217172  |
| C | 11.173020 | 2.320410 | 5.925668  |
| H | 12.127594 | 2.249547 | 6.459010  |
| H | 11.263889 | 3.119605 | 5.183155  |
| H | 11.026846 | 1.376349 | 5.391630  |
| C | 8.245370  | 3.936890 | 1.957526  |
| C | 6.896999  | 4.339120 | 1.667313  |
| H | 6.416744  | 3.703849 | 0.925506  |
| C | 5.929827  | 5.250828 | 2.235925  |
| H | 4.929907  | 4.986792 | 1.897543  |
| C | 5.965907  | 6.501149 | 2.941444  |
| C | 7.103369  | 7.209349 | 3.420539  |
| H | 6.882404  | 8.227335 | 3.742732  |
| C | 8.424365  | 6.831387 | 3.733005  |
| H | 8.972246  | 7.637095 | 4.218219  |
| C | 9.169092  | 5.640136 | 3.697528  |
| H | 10.073285 | 5.705949 | 4.300765  |
| C | 9.118871  | 4.439815 | 2.960003  |
| H | 10.007539 | 3.827282 | 3.112326  |
| C | 10.635739 | 3.177075 | 0.093900  |
| H | 10.453756 | 3.978215 | -0.626810 |
| H | 11.137035 | 2.357540 | -0.433006 |

|   |           |           |           |
|---|-----------|-----------|-----------|
| H | 11.328237 | 3.560206  | 0.850032  |
| C | 9.516893  | 1.065746  | 1.971377  |
| H | 8.642277  | 0.602879  | 2.436555  |
| H | 10.208368 | 1.352730  | 2.769916  |
| H | 10.017440 | 0.308014  | 1.357959  |
| C | 7.835754  | 1.971895  | -0.455445 |
| H | 7.541257  | 2.791638  | -1.118133 |
| H | 6.926249  | 1.525616  | -0.040537 |
| H | 8.323221  | 1.207657  | -1.070532 |
| C | 2.844275  | 6.339625  | 2.674030  |
| H | 1.904756  | 6.837562  | 2.937549  |
| H | 2.812505  | 5.330694  | 3.097438  |
| H | 2.872990  | 6.251124  | 1.583138  |
| C | 4.217875  | 9.101136  | 2.628285  |
| H | 5.055135  | 9.720291  | 2.965699  |
| H | 3.294280  | 9.591257  | 2.956499  |
| H | 4.224778  | 9.091822  | 1.534939  |
| C | 4.111150  | 7.539135  | 5.231426  |
| H | 4.989949  | 8.027722  | 5.664115  |
| H | 3.982105  | 6.576696  | 5.733118  |
| H | 3.236407  | 8.157004  | 5.462775  |
| C | 6.053713  | 7.163476  | -1.433516 |
| C | 6.021740  | 8.438208  | -0.795824 |
| H | 5.021169  | 8.861179  | -0.755904 |
| C | 6.944738  | 9.284252  | -0.124336 |
| H | 6.433876  | 10.160095 | 0.266049  |
| C | 8.312444  | 9.234008  | 0.264226  |
| C | 9.309260  | 8.232803  | 0.097016  |
| H | 10.233569 | 8.452204  | 0.628443  |
| C | 9.383294  | 6.969727  | -0.539314 |
| H | 10.334521 | 6.473630  | -0.364799 |
| C | 8.483311  | 6.164350  | -1.275760 |

|    |           |           |           |
|----|-----------|-----------|-----------|
| H  | 8.919424  | 5.207350  | -1.547701 |
| C  | 7.117582  | 6.240769  | -1.635157 |
| H  | 6.795010  | 5.317594  | -2.114103 |
| C  | 2.975905  | 7.726982  | -1.788243 |
| H  | 2.801127  | 7.765286  | -0.708336 |
| H  | 2.061216  | 7.347433  | -2.256796 |
| H  | 3.125542  | 8.750424  | -2.146593 |
| C  | 3.985601  | 4.817415  | -1.736666 |
| H  | 3.793557  | 4.752122  | -0.660714 |
| H  | 4.782567  | 4.107379  | -1.978685 |
| H  | 3.081337  | 4.484291  | -2.258075 |
| C  | 4.660446  | 6.646130  | -4.131250 |
| H  | 4.888584  | 7.664784  | -4.460873 |
| H  | 3.757347  | 6.312670  | -4.654002 |
| H  | 5.489358  | 6.003823  | -4.444974 |
| C  | 7.600794  | 12.036898 | 1.515449  |
| H  | 8.034494  | 12.914003 | 2.008575  |
| H  | 6.850366  | 11.616337 | 2.192584  |
| H  | 7.088898  | 12.388313 | 0.614085  |
| C  | 10.210513 | 11.627879 | -0.073941 |
| H  | 10.637728 | 12.536710 | 0.363796  |
| H  | 9.712815  | 11.901476 | -1.009771 |
| H  | 11.035374 | 10.952774 | -0.323168 |
| C  | 9.892339  | 10.397767 | 2.737894  |
| H  | 10.362068 | 11.302165 | 3.140534  |
| H  | 10.678570 | 9.648864  | 2.603432  |
| H  | 9.193176  | 10.018789 | 3.489567  |
| Si | 4.531075  | 0.189524  | 3.192267  |
| Si | 9.769752  | 2.686062  | 7.154029  |
| Si | 9.032861  | 2.552518  | 0.894861  |
| Si | 4.299707  | 7.347648  | 3.352579  |
| Si | 4.425395  | 6.593440  | -2.249465 |



|    |          |           |          |
|----|----------|-----------|----------|
| Si | 8.986583 | 10.802606 | 1.118932 |
| Lu | 6.977309 | 3.448929  | 4.110635 |
| Lu | 7.244757 | 6.961472  | 0.795388 |

**Lu<sub>2</sub>(1,5-COT)(1,4-COT)<sub>2</sub>:**

|    |           |           |           |
|----|-----------|-----------|-----------|
| C  | 4.065714  | -1.394045 | 3.668222  |
| Si | 5.432290  | -0.359908 | 2.853459  |
| C  | 4.781604  | 0.307192  | 1.196871  |
| C  | 5.885613  | 1.065331  | 4.037981  |
| Lu | 6.912746  | 3.370188  | 3.925844  |
| C  | 7.301889  | 4.031334  | 1.471969  |
| Lu | 6.990832  | 6.905965  | 0.685826  |
| C  | 8.358398  | 6.208389  | -1.338183 |
| C  | 7.009364  | 5.972778  | -1.686991 |
| C  | 5.792727  | 6.673092  | -1.523362 |
| C  | 5.400601  | 7.933803  | -0.987182 |
| Si | 3.530865  | 8.254846  | -1.197797 |
| C  | 3.178534  | 8.460729  | -3.050520 |
| C  | 7.171114  | 0.989982  | 4.650411  |
| C  | 7.926024  | 1.758168  | 5.575700  |
| C  | 7.759213  | 2.971425  | 6.302098  |
| Si | 9.230916  | 3.405490  | 7.438093  |
| C  | 10.897836 | 2.972366  | 6.638133  |
| C  | 4.814631  | 1.991951  | 4.196543  |
| C  | 4.589785  | 3.163605  | 4.953598  |
| C  | 5.357307  | 3.946689  | 5.845556  |
| C  | 6.666044  | 3.879643  | 6.383319  |
| C  | 8.585355  | 3.954856  | 2.076352  |
| Si | 9.853302  | 2.739253  | 1.325316  |
| C  | 9.038773  | 1.634375  | 0.016519  |
| C  | 9.135531  | 4.817112  | 3.073052  |
| C  | 8.875108  | 6.143142  | 3.468606  |

|    |           |           |           |
|----|-----------|-----------|-----------|
| C  | 7.810038  | 7.058082  | 3.367035  |
| C  | 6.400308  | 6.922016  | 3.186071  |
| C  | 5.696735  | 5.824859  | 2.622868  |
| C  | 6.076599  | 4.705490  | 1.805704  |
| C  | 6.158759  | 8.995891  | -0.412254 |
| C  | 7.519397  | 9.244591  | -0.092286 |
| C  | 8.752740  | 8.539008  | -0.176641 |
| Si | 10.273752 | 9.509993  | 0.447830  |
| C  | 11.602453 | 8.339383  | 1.130539  |
| C  | 9.070418  | 7.252615  | -0.698950 |
| C  | 6.916955  | -1.488855 | 2.507058  |
| C  | 9.257992  | 5.255114  | 7.863326  |
| C  | 9.044789  | 2.404348  | 9.039772  |
| C  | 11.250767 | 3.726277  | 0.503957  |
| C  | 10.630843 | 1.636346  | 2.658312  |
| C  | 2.982696  | 9.830849  | -0.295047 |
| C  | 2.504659  | 6.796520  | -0.540473 |
| C  | 9.811203  | 10.735523 | 1.822342  |
| C  | 10.996400 | 10.480178 | -1.015018 |
| H  | 7.770988  | 0.173567  | 4.256562  |
| H  | 8.930561  | 1.351017  | 5.666380  |
| H  | 6.892927  | 4.772923  | 6.958670  |
| H  | 4.851191  | 4.869849  | 6.114919  |
| H  | 3.641219  | 3.635190  | 4.708048  |
| H  | 3.981630  | 1.802738  | 3.521285  |
| H  | 3.757904  | -2.221705 | 3.019880  |
| H  | 3.181183  | -0.785778 | 3.882087  |
| H  | 4.413821  | -1.815724 | 4.616554  |
| H  | 7.752905  | -0.955339 | 2.043801  |
| H  | 6.608648  | -2.281481 | 1.816351  |
| H  | 7.284085  | -1.973754 | 3.417245  |
| H  | 5.552008  | 0.880359  | 0.670885  |

|   |           |           |           |
|---|-----------|-----------|-----------|
| H | 3.910228  | 0.956800  | 1.327172  |
| H | 4.478561  | -0.521462 | 0.547314  |
| H | 10.164879 | 5.479867  | 8.435710  |
| H | 8.404602  | 5.558108  | 8.477783  |
| H | 9.268234  | 5.874528  | 6.960948  |
| H | 9.870353  | 2.601707  | 9.732298  |
| H | 9.027889  | 1.330358  | 8.828408  |
| H | 8.107639  | 2.656771  | 9.546152  |
| H | 11.710115 | 3.214379  | 7.332619  |
| H | 11.056382 | 3.552008  | 5.723455  |
| H | 10.989654 | 1.910872  | 6.389208  |
| H | 7.138597  | 3.311438  | 0.673746  |
| H | 5.218678  | 4.259032  | 1.305940  |
| H | 8.100063  | 8.047418  | 3.720721  |
| H | 9.728981  | 6.580143  | 3.987147  |
| H | 10.094663 | 4.468697  | 3.455716  |
| H | 10.874108 | 4.341888  | -0.318326 |
| H | 12.012737 | 3.050987  | 0.099290  |
| H | 11.739570 | 4.392273  | 1.221563  |
| H | 9.889384  | 0.967495  | 3.104828  |
| H | 11.084142 | 2.220220  | 3.465088  |
| H | 11.420329 | 1.018785  | 2.215471  |
| H | 8.643233  | 2.213254  | -0.824335 |
| H | 8.224413  | 1.031528  | 0.430466  |
| H | 9.786676  | 0.943184  | -0.387210 |
| H | 5.529791  | 9.803478  | -0.046815 |
| H | 7.610942  | 10.183492 | 0.447991  |
| H | 10.104476 | 6.965346  | -0.526410 |
| H | 8.984591  | 5.339887  | -1.524853 |
| H | 6.855579  | 4.967892  | -2.073214 |
| H | 4.948535  | 6.056794  | -1.827895 |
| H | 3.181985  | 9.787576  | 0.780326  |

|    |           |           |           |
|----|-----------|-----------|-----------|
| H  | 1.902678  | 9.961638  | -0.424923 |
| H  | 3.470108  | 10.724773 | -0.697005 |
| H  | 2.657758  | 6.655798  | 0.534422  |
| H  | 2.753698  | 5.855312  | -1.040668 |
| H  | 1.437272  | 6.981370  | -0.704770 |
| H  | 3.723788  | 9.320552  | -3.452707 |
| H  | 2.110390  | 8.616722  | -3.237089 |
| H  | 3.494358  | 7.576417  | -3.613002 |
| H  | 10.713566 | 11.255181 | 2.163389  |
| H  | 9.376207  | 10.221500 | 2.685081  |
| H  | 9.103926  | 11.501356 | 1.489441  |
| H  | 11.887962 | 11.043623 | -0.718588 |
| H  | 10.263312 | 11.188809 | -1.413568 |
| H  | 11.277780 | 9.802669  | -1.827637 |
| H  | 12.401579 | 8.926352  | 1.596791  |
| H  | 12.064119 | 7.726572  | 0.350192  |
| H  | 11.185372 | 7.669476  | 1.888807  |
| H  | 4.614085  | 5.907821  | 2.681910  |
| Si | 5.376927  | 8.273752  | 4.066358  |
| C  | 5.709558  | 8.177072  | 5.932218  |
| C  | 5.863627  | 10.009792 | 3.478096  |
| C  | 3.521599  | 8.025232  | 3.760177  |
| H  | 5.322360  | 10.764601 | 4.059577  |
| H  | 6.932946  | 10.203426 | 3.604552  |
| H  | 5.618934  | 10.156858 | 2.422245  |
| H  | 5.170836  | 8.968891  | 6.464166  |
| H  | 5.387833  | 7.215347  | 6.342844  |
| H  | 6.776295  | 8.291330  | 6.148515  |
| H  | 2.963759  | 8.831628  | 4.248711  |
| H  | 3.273666  | 8.052296  | 2.694581  |
| H  | 3.155994  | 7.079591  | 4.173233  |

**Scandium complex (4Sc)**  
1,4 isomer

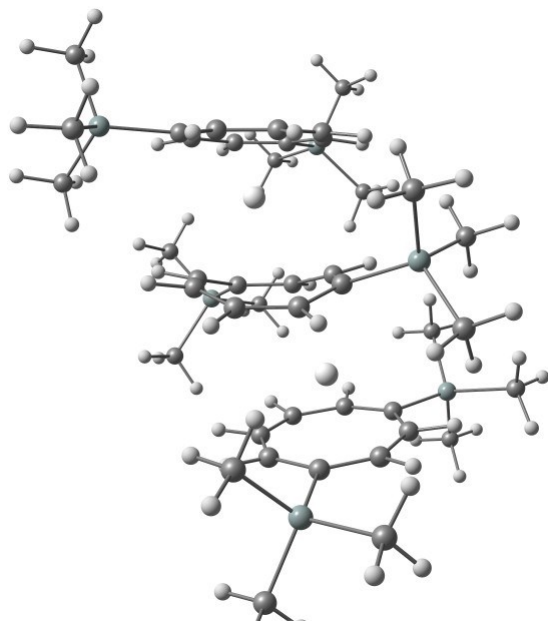

1,5 isomer

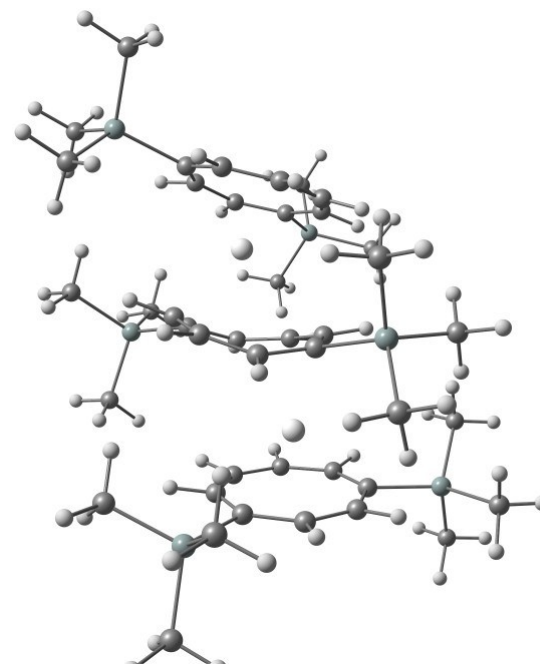

**Figure S19.** Optimized structures

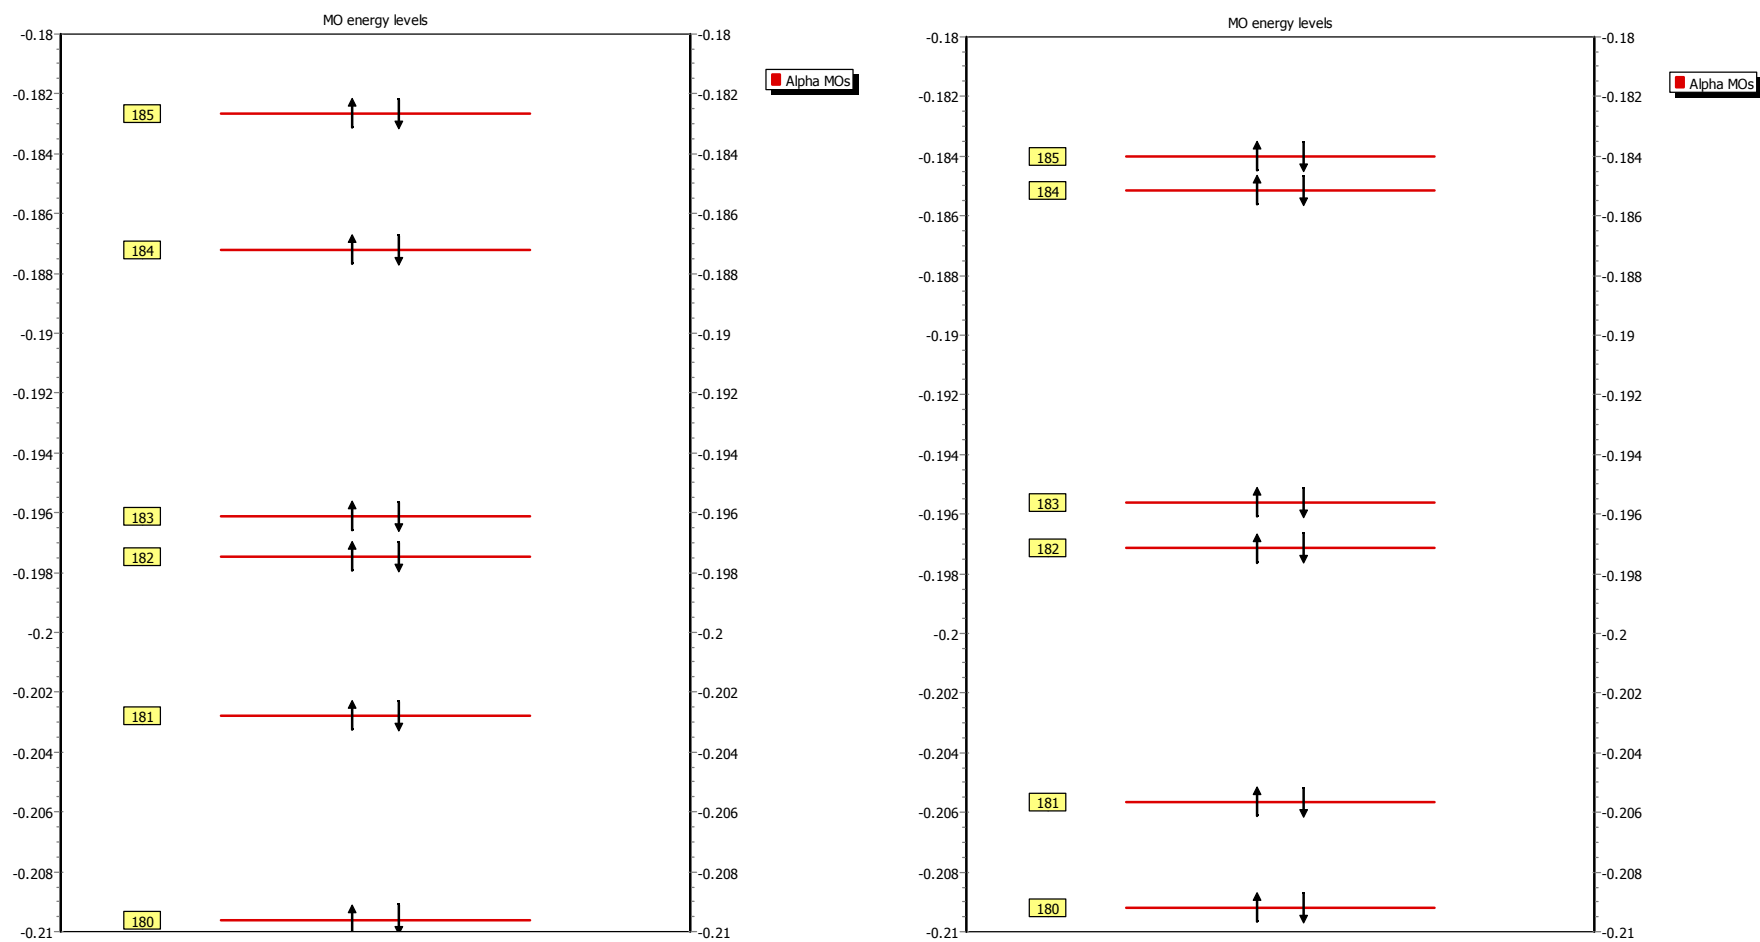

**Figure S20.** Associated MO diagrams focusing on the frontier orbitals (MO 185 being the HOMO)

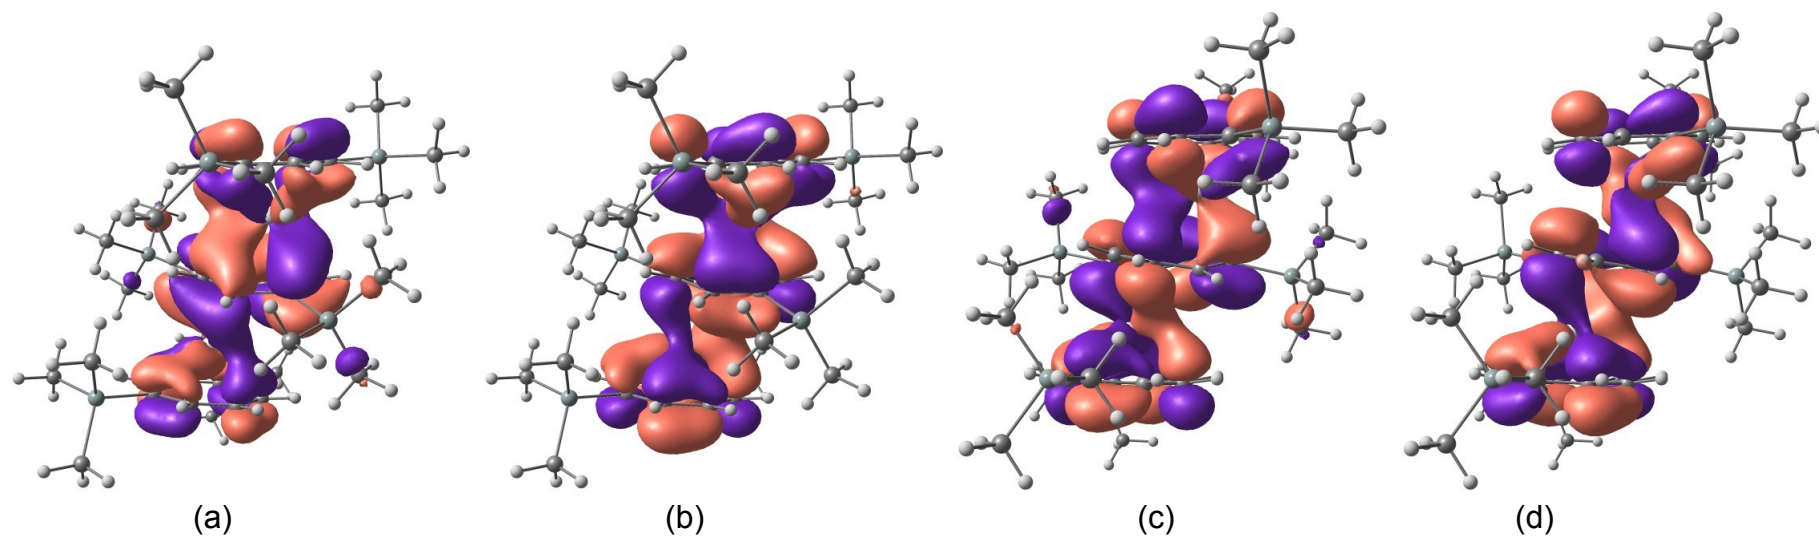

**Figure S21.**  $\delta$ -bonding orbitals: HOMO (a,c) and HOMO-1 (b,d)

The two  $\delta$ -bonds are overall slightly more stable for the 1,4-COT'' complex than for the 1,5-COT'' one, as the two formally degenerated orbitals are strongly energetically splitted in the 1,4 isomer in line with a first order Jahn-Teller effect associated with the strongly distorted COT ring in between the two metal centers. The same holds true for the Lutetium complex.

**Lanthanum complex (4La)**

1,4 isomer

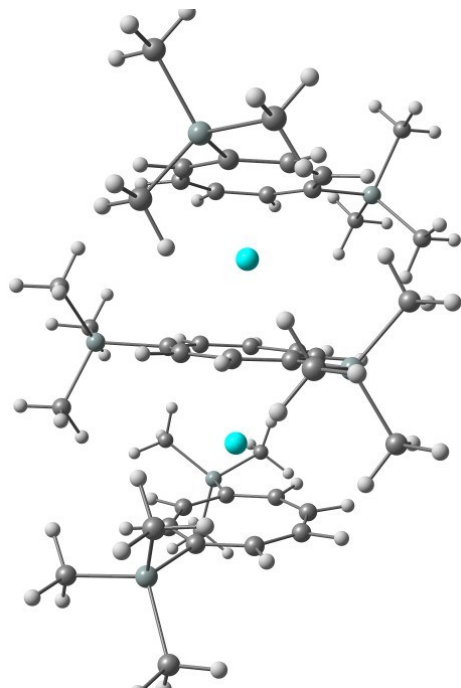

1,5 isomer

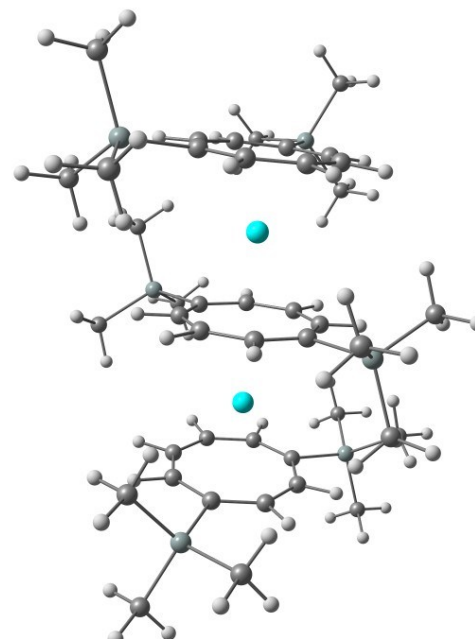**Figure S22.** Optimized structures



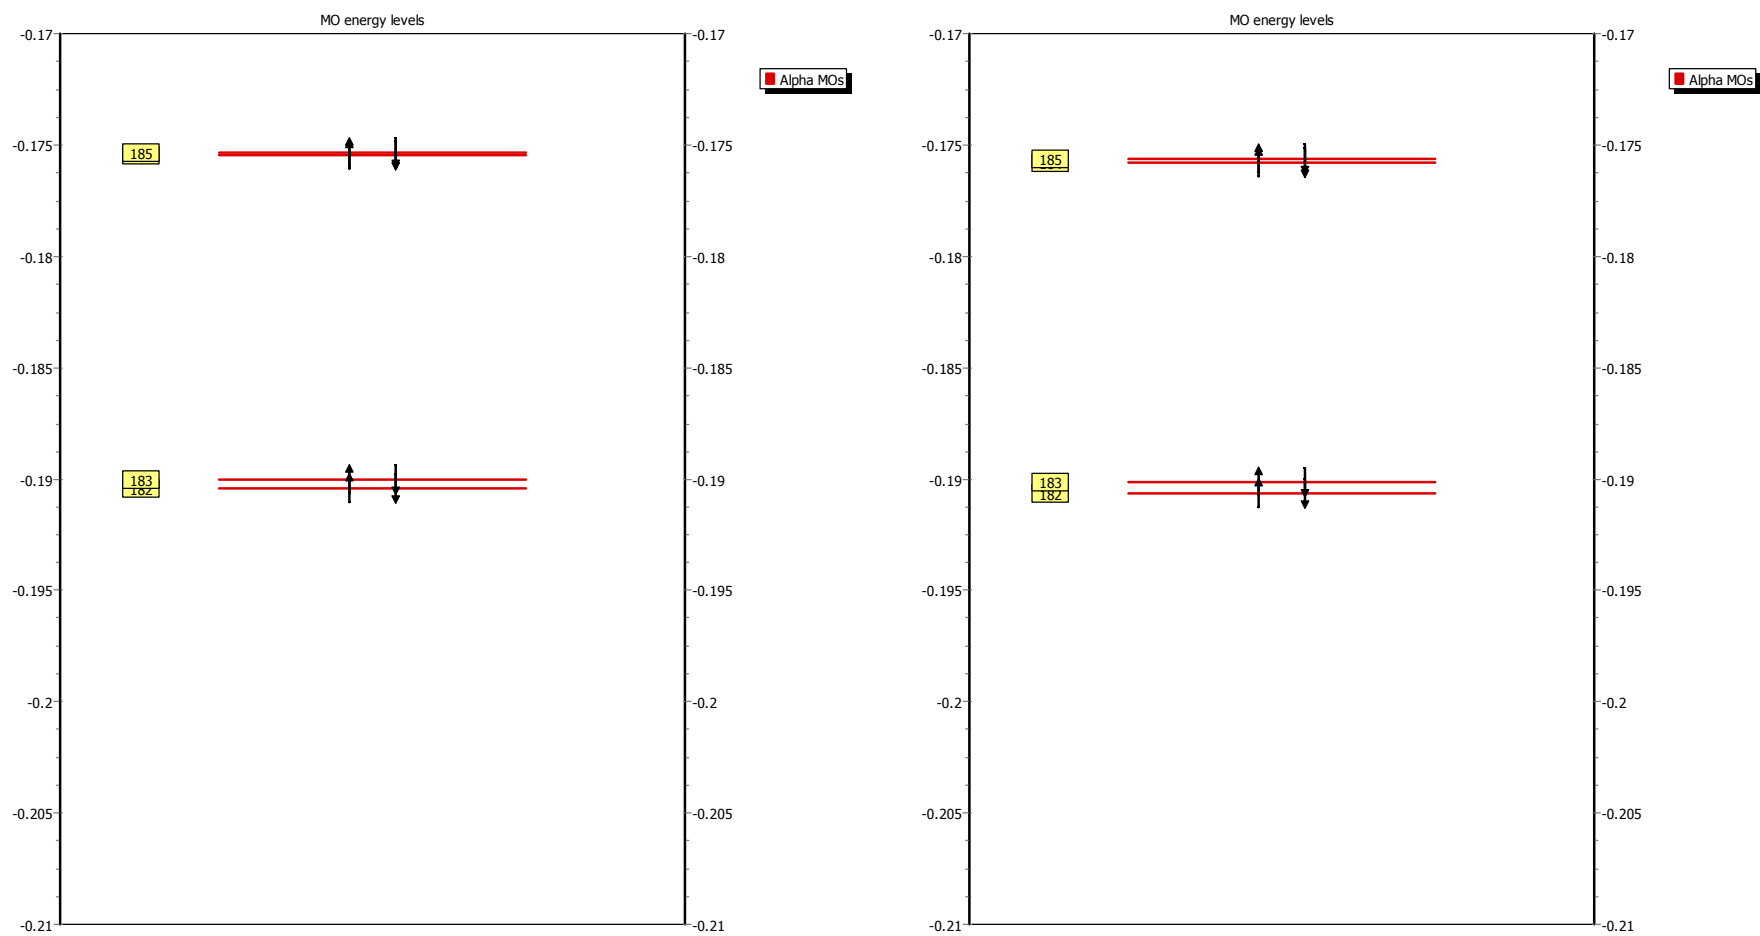

**Figure S23.** Associated MO diagrams focusing on the frontier orbitals (MO 185 being the HOMO)

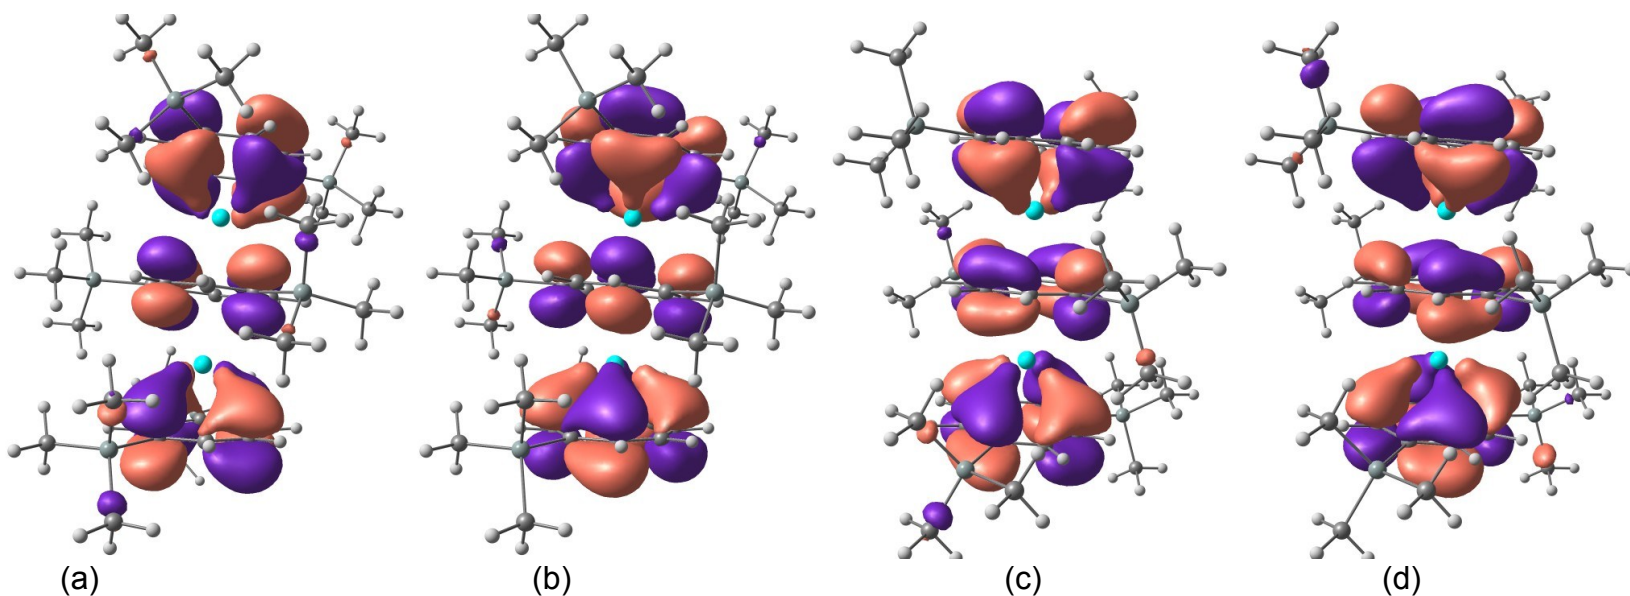

**Figure S24.**  $\delta$ -bonding orbitals: HOMO (a,c) and HOMO-1 (b,d)

The two  $\delta$ -bonds are overall slightly more stable for the 1,5-COT'' isomer than for the 1,4-COT'' one, as the two formally degenerated orbitals are energetically splitted in the 1,5 isomer in line with a first order Jahn-Teller effect. This is the same effect as for **4Sc** and **4Lu**, but in the opposite direction as there is no distortion of the ring. Therefore, it is the steric repulsion between the silyl groups inducing the first order Jahn teller effect. The same holds true for **4Y**.

**Yttrium complex (4Y)**  
1,4 isomer

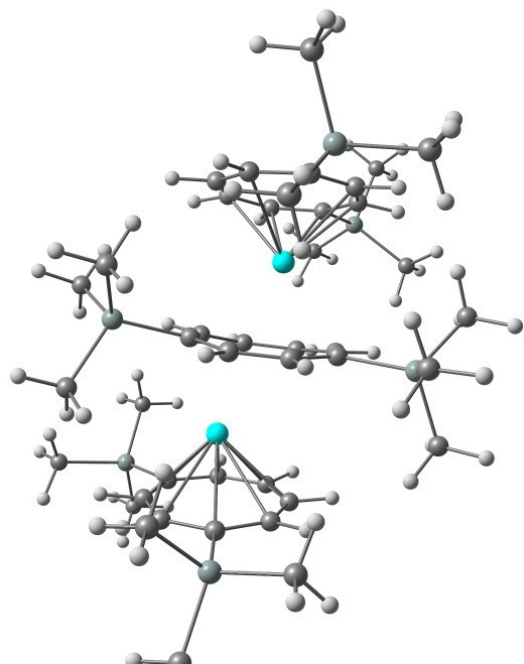

1,5 isomer

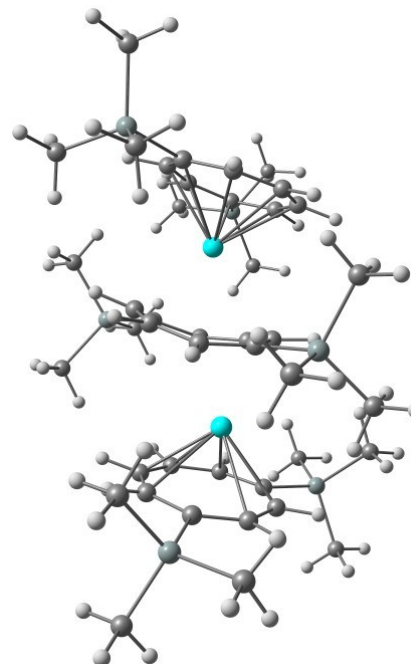

**Figure S25.** Optimized structures

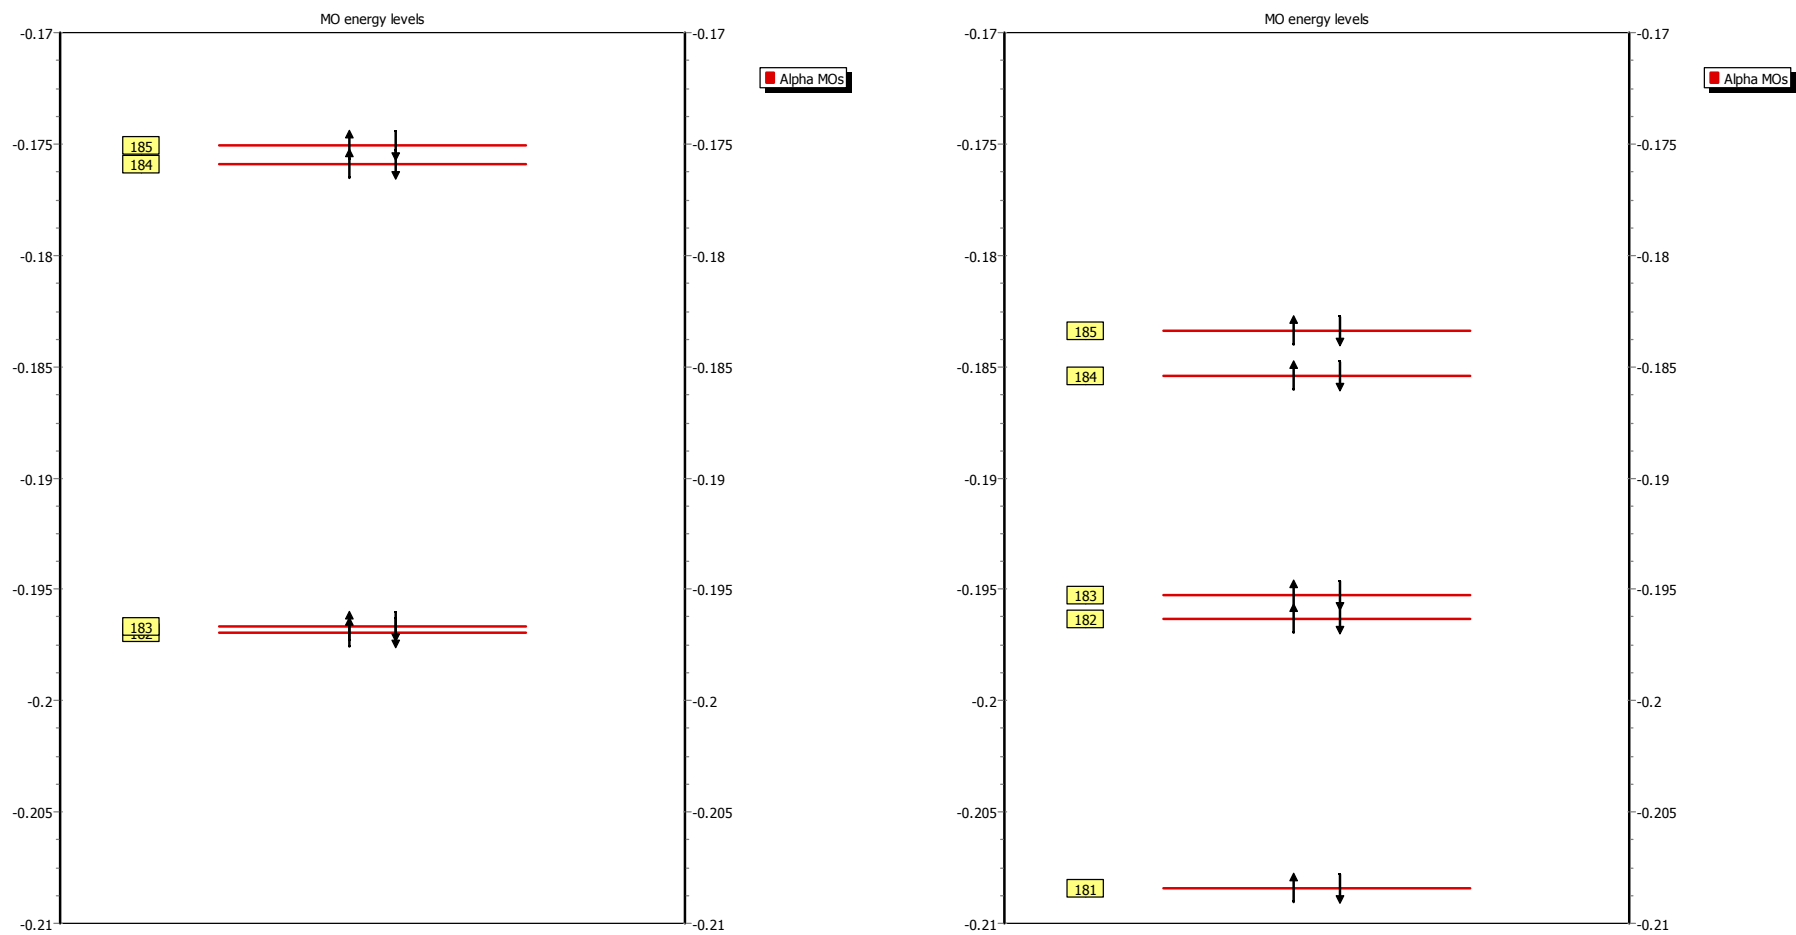

**Figure S26.** Associated MO diagrams focusing on the frontier orbitals (MO 185 being the HOMO)

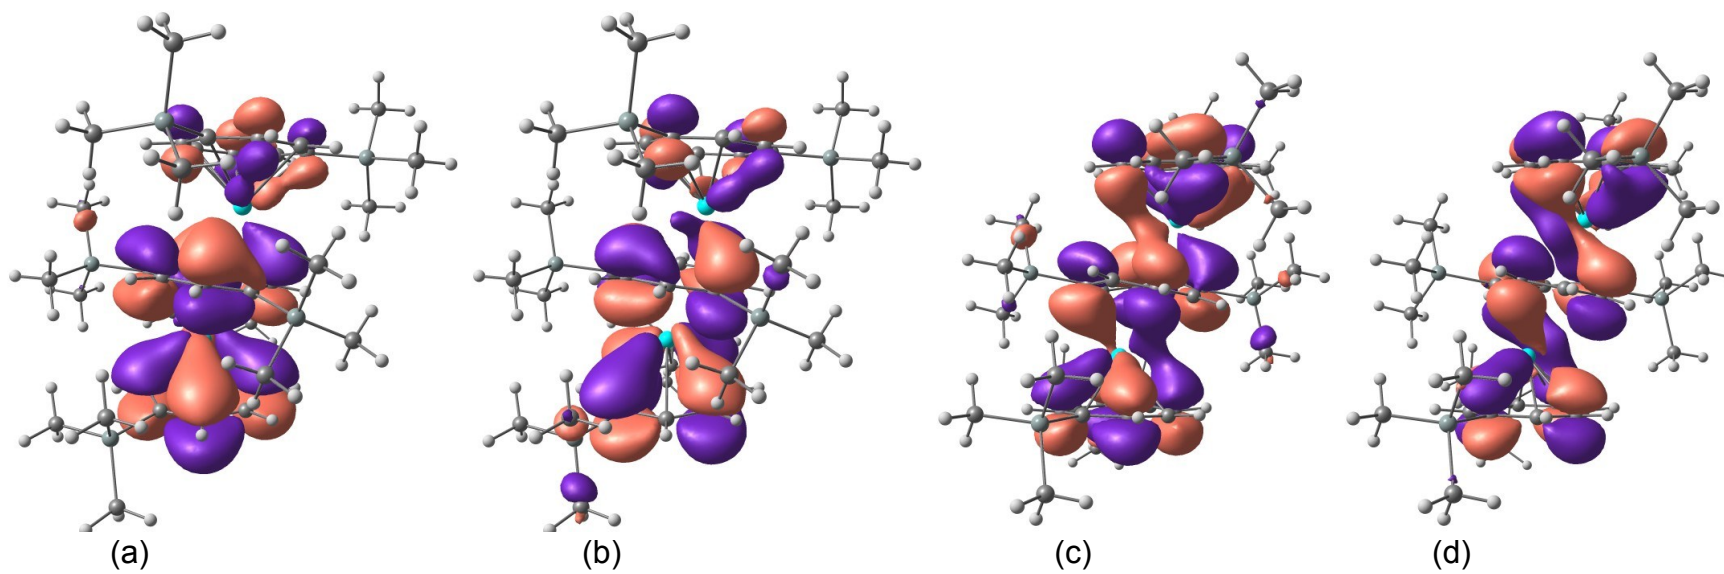

**Figure S27.**  $\delta$ -bonding orbitals: HOMO (a,c) and HOMO-1 (b,d)

**Neodymium complex (4Nd)**

1,4 isomer

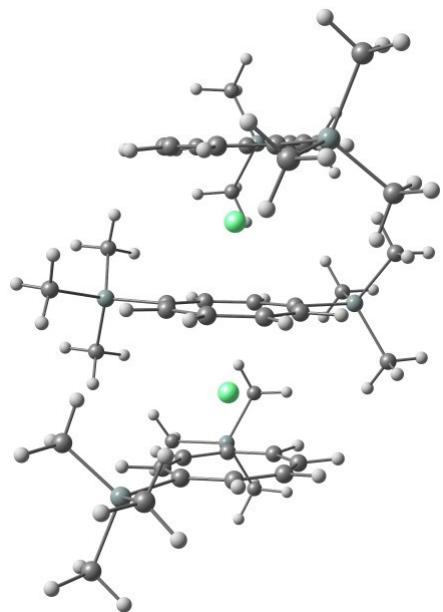**Figure S28.** Optimized structures

1,5 isomer

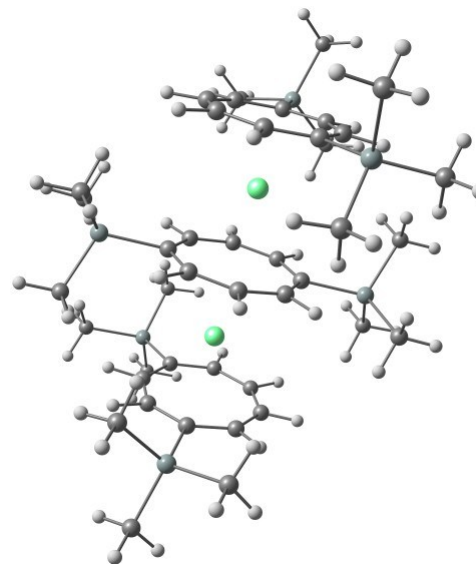

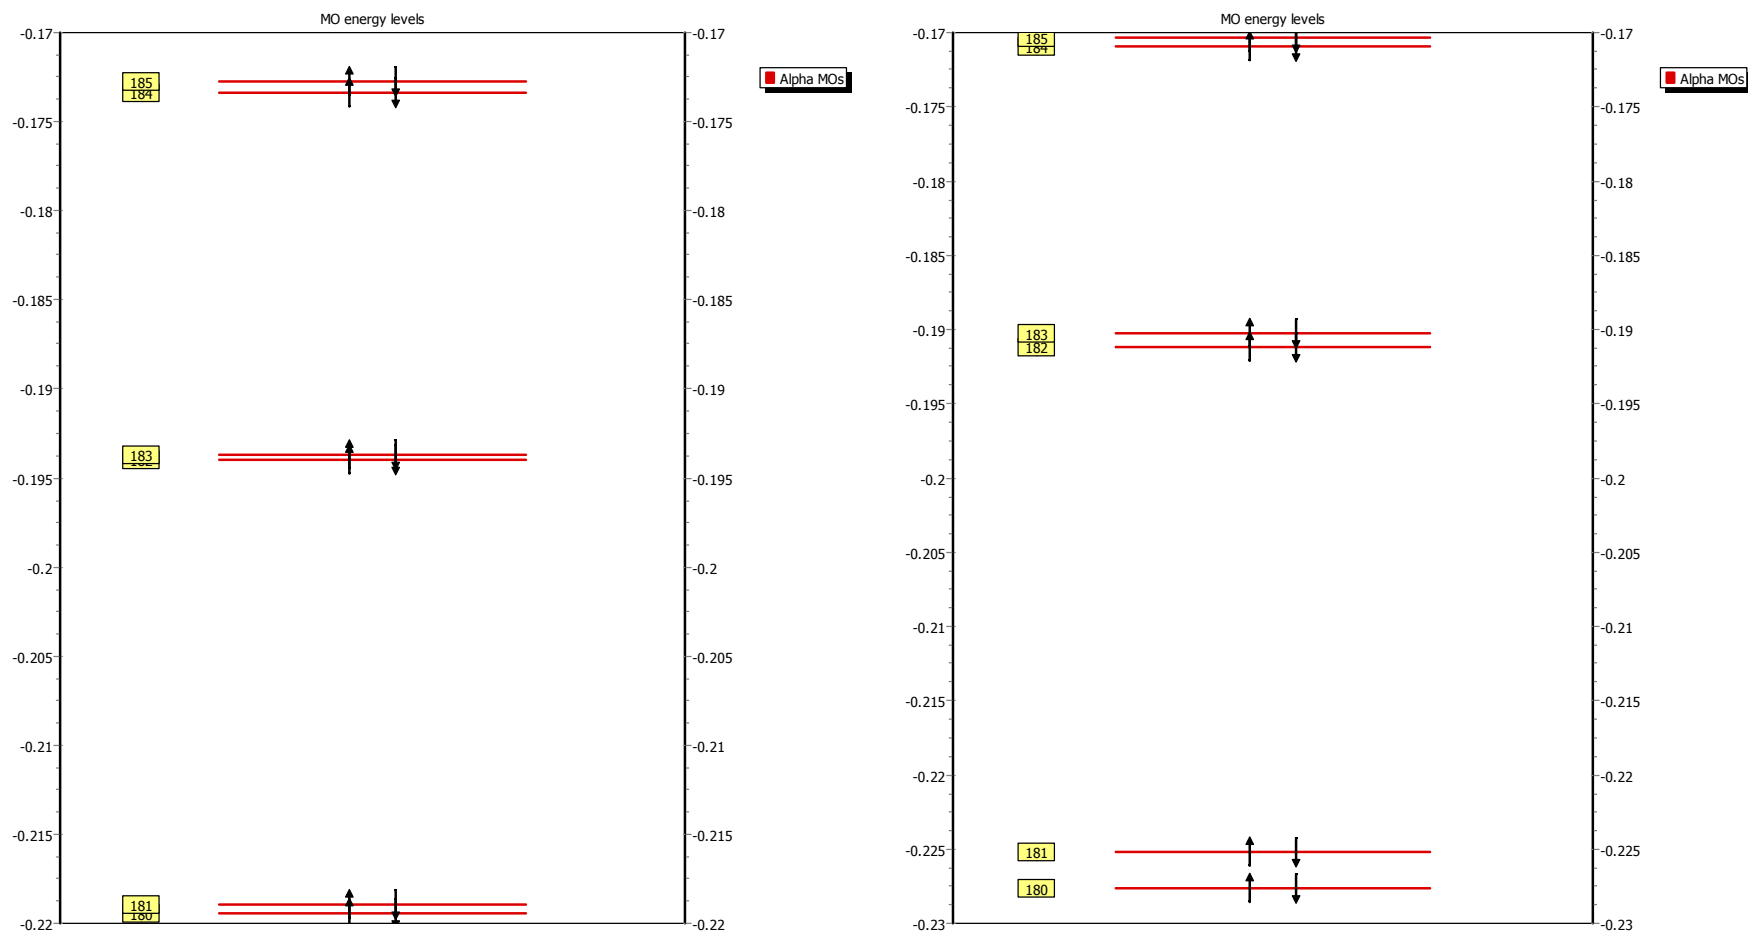

**Figure S29.** Associated MO diagrams focusing on the frontier orbitals (MO 185 being the HOMO)

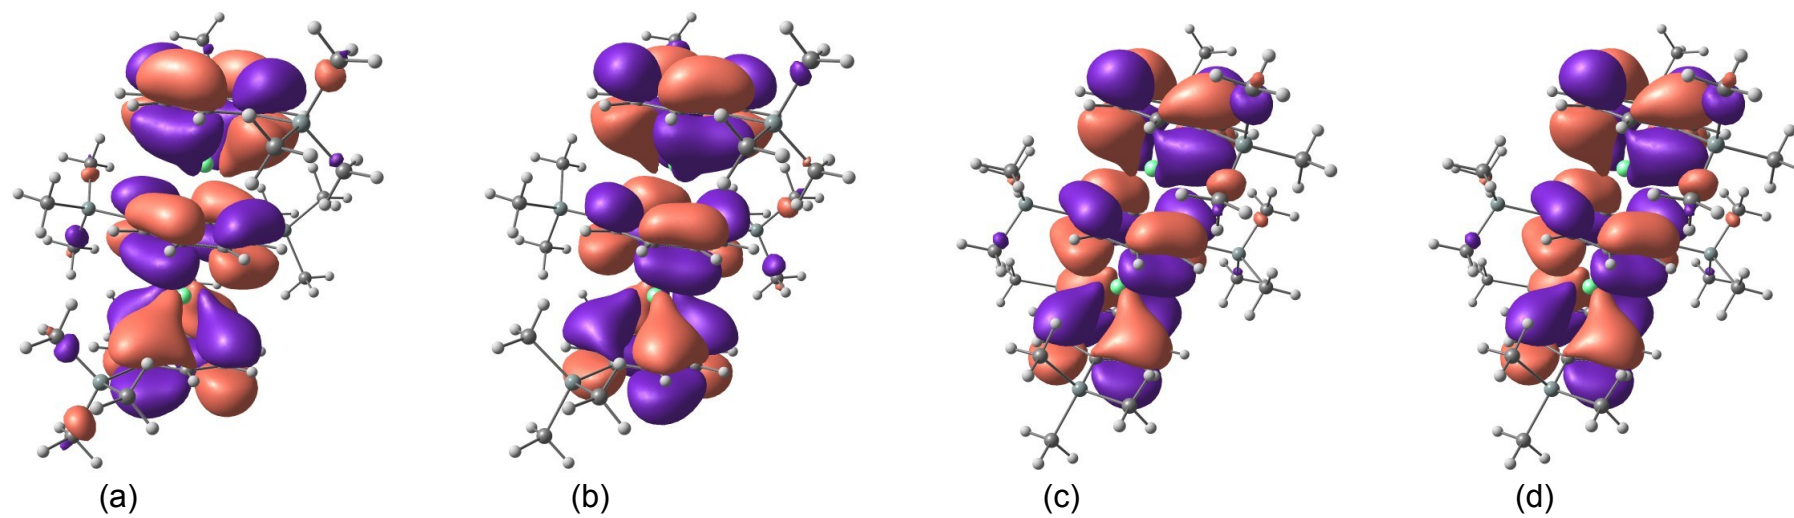

**Figure S20.**  $\delta$ -bonding orbitals: HOMO (a,c) and HOMO-1 (b,d)



**Holmium complex (4Ho)**

1,4 isomer

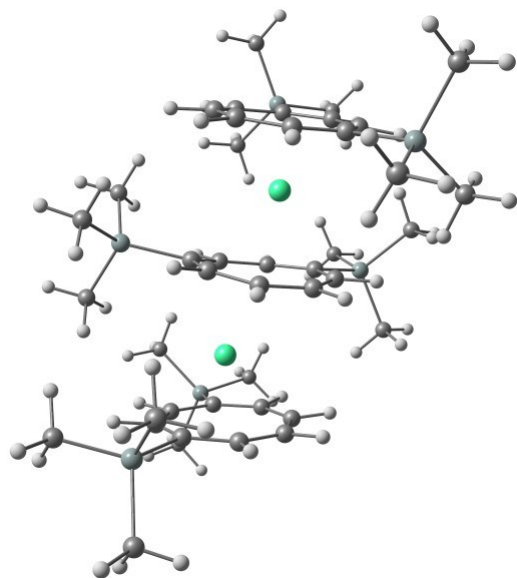

1,5 isomer

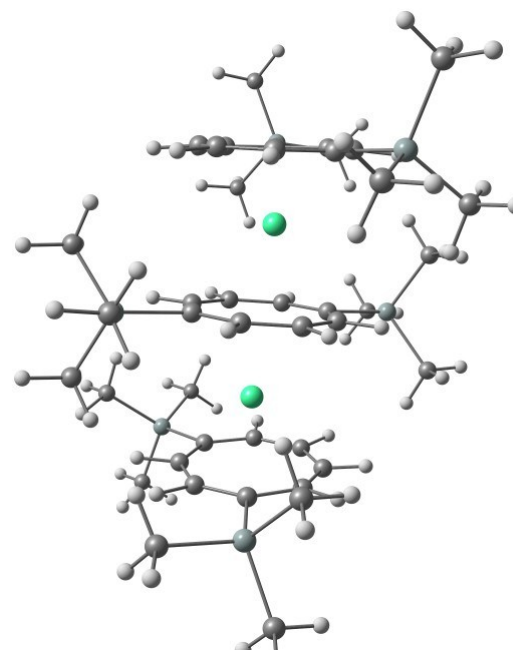**Figure S31.** Optimized structures

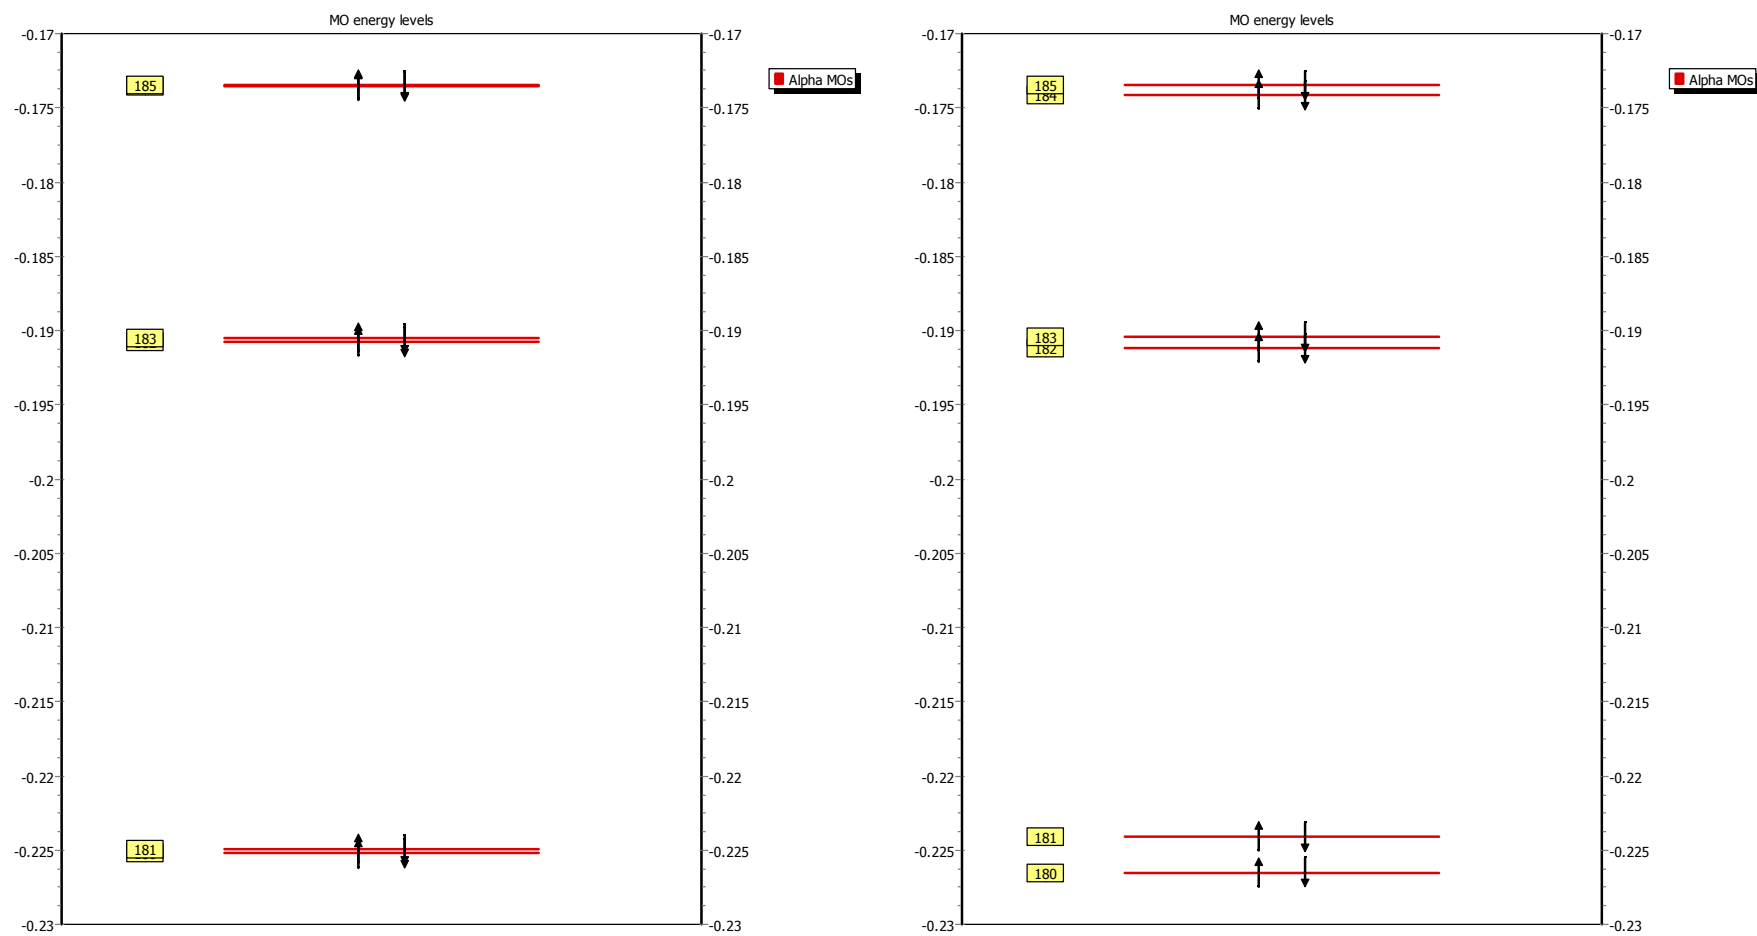

**Figure S32.** Associated MO diagrams focusing on the frontier orbitals (MO 185 being the HOMO)

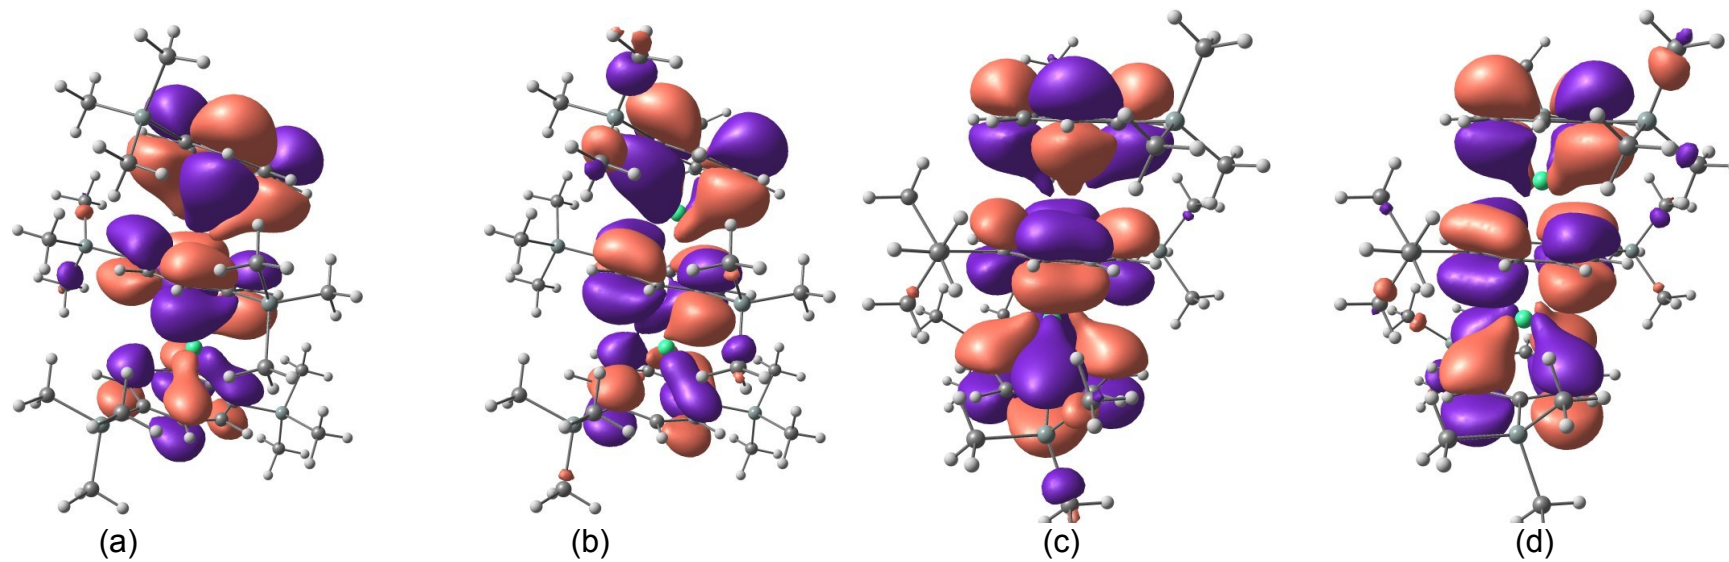

**Figure S33.**  $\delta$ -bonding orbitals: HOMO (a,c) and HOMO-1 (b,d)

**Lutetium complex (4Lu)**  
1,4 isomer

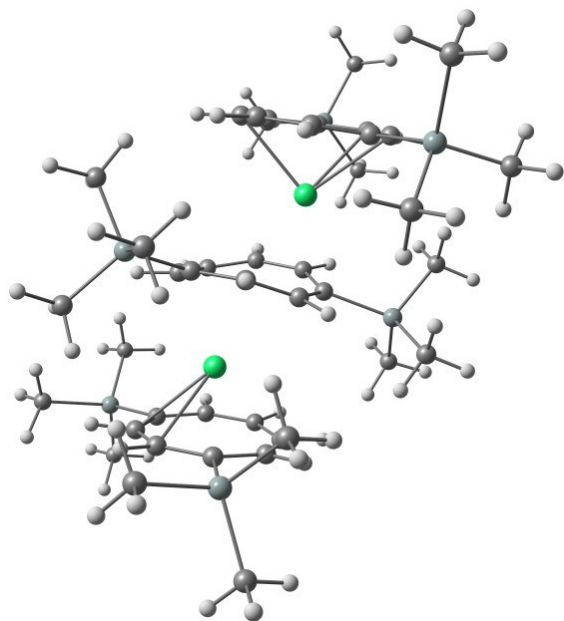

1,5 isomer

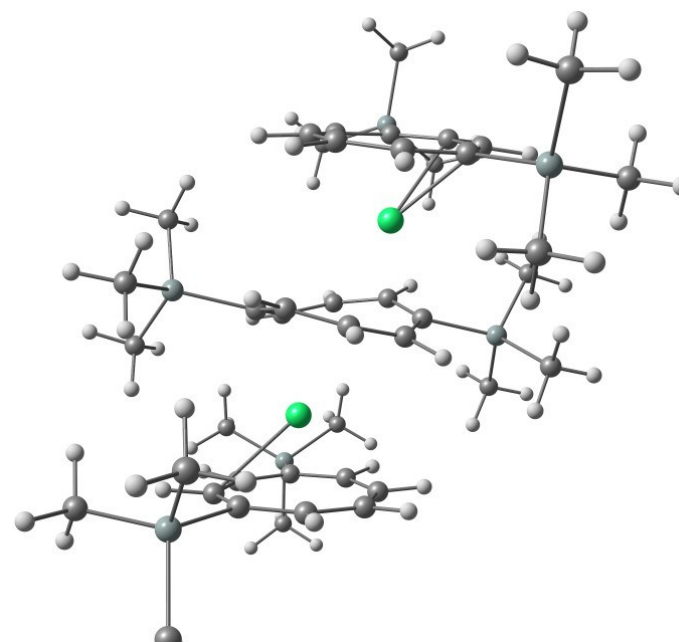

**Figure S34.** Optimized structures

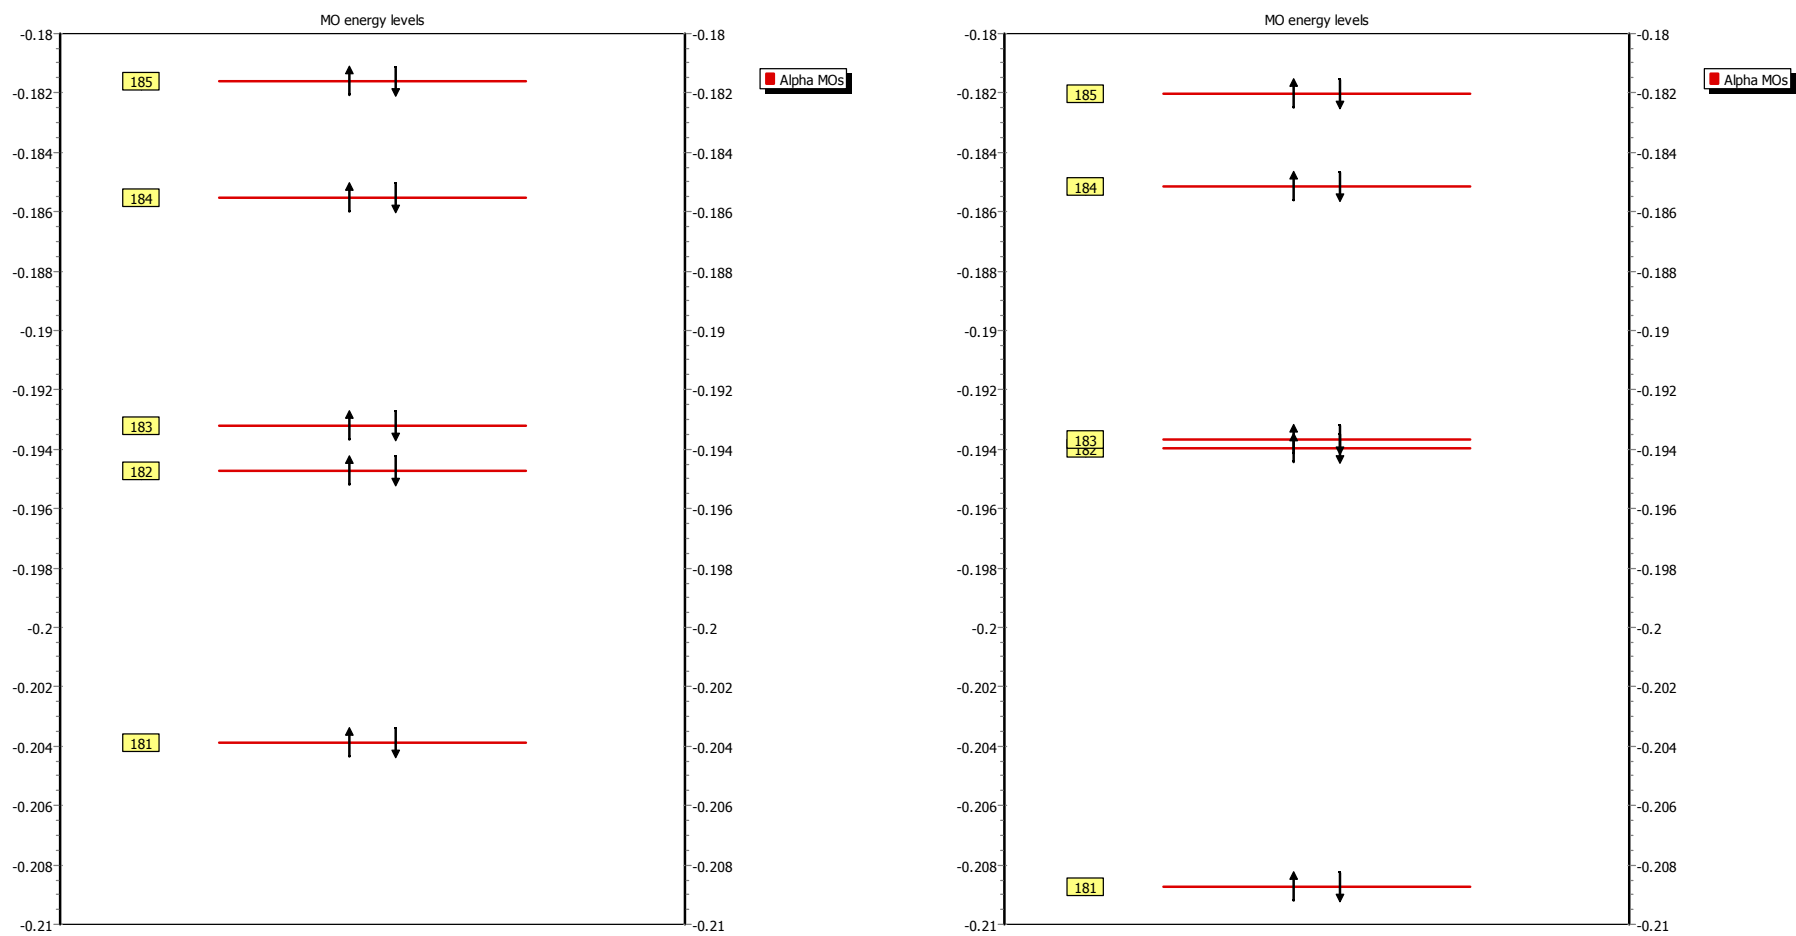

**Figure S35.** Associated MO diagrams focusing on the frontier orbitals (MO 185 being the HOMO)

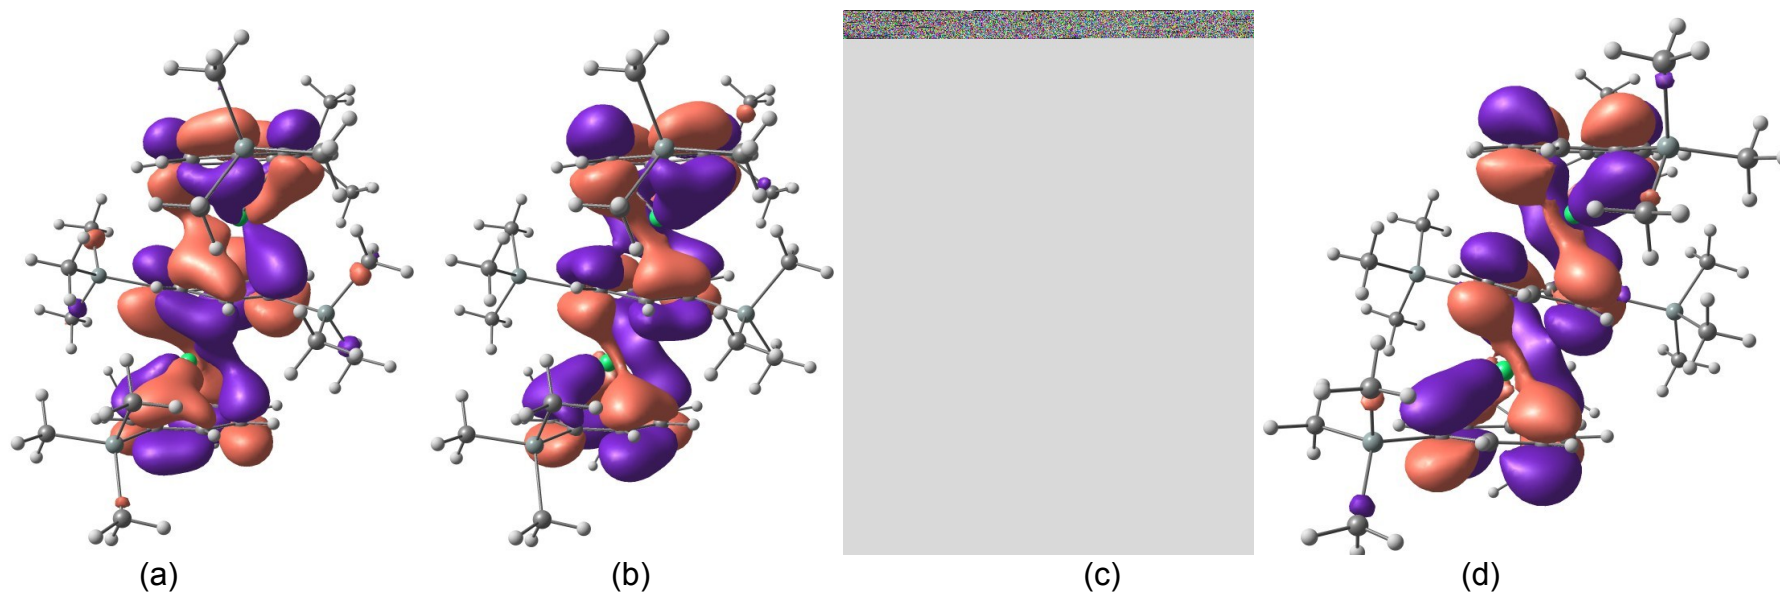

**Figure S36.**  $\delta$ -bonding orbitals: HOMO (a,c) and HOMO-1 (b,d)

The situation is different for **4Y** and **4La**. The Frontier orbitals are also  $\delta$ -bonding orbitals, but the overall stabilization is greater in the 1,5 isomer than in the 1,4 isomer.

## 7. References

- [S1] J. Rausch, C. Apostolidis, O. Walter, V. Lorenz, C. G. Hrib, L. Hilfert, M. Kühling and F. T. Edelmann, *New J. Chem.*, 2015, **39**, 7656–7666.
- [S2] J. H. Freeman and M. L. Smith, *J. Inorg. Nucl. Chem.*, 1958, **7**, 224–227.
- [S3] A. R. Pray, *Inorg. Synth.*, 1957, **5**, 153–156.
- [S4] M. J. Turner, J. J. McKinnon, S. K. Wolff, D. J. Grimwood, P. R. Spackman, D. Jayatilaka and M. A. Spackman, *CrystalExplorer17* (2017). University of Western Australia. <http://hirshfeldsurface.net>
- [S5] a) J. P. Perdew and Y. Wang, *Phys. Rev. B*, 1992, **45**, 13244-13249; b) A. D. Becke, *J. Chem. Phys.*, 1993, **98**, 5648-5652.
- [S6] Gaussian09, revision D.01. M. J. Frisch, G. W. Trucks, H. B. Schlegel, G. E. Scuseria, M. A. Robb, J. R. Cheeseman, G. Scalmani, V. Barone, B. Mennucci, G. A. Petersson, H. Nakatsuji, M. Caricato, X. Li, H. P. Hratchian, A. F. Izmaylov, J. Bloino, G. Zheng, J. L. Sonnenberg, M. Hada, M. Ehara, K. Toyota, R. Fukuda, J. Hasegawa, M. Ishida, T. Nakajima, Y. Honda, O. Kitao, H. Nakai, T. Vreven, J. A. Montgomery, Jr., J. E. Peralta, F. Ogliaro, M. Bearpark, J. J. Heyd, E. Brothers, K. N. Kudin, V. N. Staroverov, T. Keith, R. Kobayashi, J. Normand, K. Raghavachari, A. Rendell, J. C. Burant, S. S. Iyengar, J. Tomasi, M. Cossi, N. Rega, J. M. Millam, M. Klene, J. E. Knox, J. B. Cross, V. Bakken, C. Adamo, J. Jaramillo, R. Gomperts, R. E. Stratmann, O. Yazyev, A. J. Austin, R. Cammi, C. Pomelli, J. W. Ochterski, R. L. Martin, K. Morokuma, V. G. Zakrzewski, G. A. Voth, P. Salvador, J. J. Dannenberg, S. Dapprich, A. D. Daniels, O. Farkas, J. B. Foresman, J. V. Ortiz, J. Cioslowski and D. J. Fox, Gaussian, Inc., Wallingford CT, 2013.
- [S7] (a) D. Andrae, U. Haeussermann, M. Dolg, H. Stoll and H. Preuss, *Theor. Chim. Acta*, 1990, **77**, 123-141; (b) J. M. L. Martin and A. Sundermann, *J. Chem. Phys.*, 2001, **114**, 3408-3420; (c) M. Dolg, H. Stoll and H. Preuss, *J. Chem. Phys.*, 1989, **90**, 1730.
- [S8] A. Bergner, M. Dolg, W. Kuechle, H. Stoll and H. Preuss, *Mol. Phys.*, 1993, **80**, 1431.
- [S9] J.-P. Blaudeau, M. P. McGrath, L. A. Curtiss and L. Radom, *J. Chem. Phys.*, 1997, **107**, 5016-5021.
- [S10] A. E. Reed, L. A. Curtiss and F. Weinhold, *Chem. Rev.*, 1988, **88**, 899-926.
